# Supplementary material for: Guideline-based exercise management for hip and knee osteoarthritis: a cross-sectional comparison of healthcare professional and patient beliefs in Ireland
Source: PubMed Central journal article supplement — BMJ Open. 2024 Jul 5;14(7):e080646. doi: 10.1136/bmjopen-2023-080646 (PMC11227783; doi:10.1136/bmjopen-2023-080646), 2024-07-05
Supplement: bmjopen-2023-080646.draft_revisions.pdf [file bmjopen-2023-080646.draft_revisions.pdf]

# BMJ Open

BMJ Open is committed to open peer review. As part of this commitment we make the peer review history of every article we publish publicly available.

When an article is published we post the peer reviewers' comments and the authors' responses online. We also post the versions of the paper that were used during peer review. These are the versions that the peer review comments apply to.

The versions of the paper that follow are the versions that were submitted during the peer review process. They are not the versions of record or the final published versions. They should not be cited or distributed as the published version of this manuscript.

BMJ Open is an open access journal and the full, final, typeset and author-corrected version of record of the manuscript is available on our site with no access controls, subscription charges or pay-per-view fees (<http://bmjopen.bmj.com>).

If you have any questions on BMJ Open's open peer review process please email [info.bmjopen@bmj.com](mailto:info.bmjopen@bmj.com)

# BMJ Open

## Guideline-based exercise management for hip and knee osteoarthritis: differences in healthcare professional and patient beliefs

|                               |                                                                                                                                                                                                                                                                                                                                                                                                                                                                                                                                                                                                                                                                                                                                                                                                                                                                                                                                                                                                                                                                                                                     |
|-------------------------------|---------------------------------------------------------------------------------------------------------------------------------------------------------------------------------------------------------------------------------------------------------------------------------------------------------------------------------------------------------------------------------------------------------------------------------------------------------------------------------------------------------------------------------------------------------------------------------------------------------------------------------------------------------------------------------------------------------------------------------------------------------------------------------------------------------------------------------------------------------------------------------------------------------------------------------------------------------------------------------------------------------------------------------------------------------------------------------------------------------------------|
| Journal:                      | <i>BMJ Open</i>                                                                                                                                                                                                                                                                                                                                                                                                                                                                                                                                                                                                                                                                                                                                                                                                                                                                                                                                                                                                                                                                                                     |
| Manuscript ID                 | bmjopen-2023-080646                                                                                                                                                                                                                                                                                                                                                                                                                                                                                                                                                                                                                                                                                                                                                                                                                                                                                                                                                                                                                                                                                                 |
| Article Type:                 | Original research                                                                                                                                                                                                                                                                                                                                                                                                                                                                                                                                                                                                                                                                                                                                                                                                                                                                                                                                                                                                                                                                                                   |
| Date Submitted by the Author: | 23-Oct-2023                                                                                                                                                                                                                                                                                                                                                                                                                                                                                                                                                                                                                                                                                                                                                                                                                                                                                                                                                                                                                                                                                                         |
| Complete List of Authors:     | Toomey, Clodagh; University of Limerick, School of Allied Health; University of Limerick Health Research Institute<br>Bhardwaj, Avantika; University of Limerick, School of Allied Health; University of Limerick Health Research Institute<br>Browne, Jacqui; IMPACT Steering Committee, Patient Representative<br>Dowling, Ian; Ian Dowling Physiotherapy Clinic<br>Grealis, Stacey; IMPACT Steering Committee, Patient Representative; University College Dublin, Centre of Arthritis Research<br>Hayes, Peter; University of Limerick, School of Medicine; University of Limerick Health Research Institute<br>Higgins, Niall; University of Limerick, School of Allied Health<br>Maguire, Darragh; National Orthopaedic Hospital Cappagh, Physiotherapy Department<br>O’Hora, John; Health Service Executive, Community Healthcare West<br>Rector, Joseph; University of Limerick, School of Allied Health<br>Wood-Thornsbury, Arianna; University of Limerick, School of Allied Health<br>Kennedy, Norelee; University of Limerick, School of Allied Health; University of Limerick Health Research Institute |
| Keywords:                     | Physical Therapy Modalities, RHEUMATOLOGY, Protocols & guidelines < HEALTH SERVICES ADMINISTRATION & MANAGEMENT, Hip < ORTHOPAEDIC & TRAUMA SURGERY, Knee < ORTHOPAEDIC & TRAUMA SURGERY                                                                                                                                                                                                                                                                                                                                                                                                                                                                                                                                                                                                                                                                                                                                                                                                                                                                                                                            |
|                               |                                                                                                                                                                                                                                                                                                                                                                                                                                                                                                                                                                                                                                                                                                                                                                                                                                                                                                                                                                                                                                                                                                                     |

SCHOLARONE™  
Manuscripts

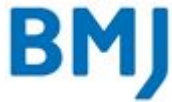

I, the Submitting Author has the right to grant and does grant on behalf of all authors of the Work (as defined in the below author licence), an exclusive licence and/or a non-exclusive licence for contributions from authors who are: i) UK Crown employees; ii) where BMJ has agreed a CC-BY licence shall apply, and/or iii) in accordance with the terms applicable for US Federal Government officers or employees acting as part of their official duties; on a worldwide, perpetual, irrevocable, royalty-free basis to BMJ Publishing Group Ltd ("BMJ") its licensees and where the relevant Journal is co-owned by BMJ to the co-owners of the Journal, to publish the Work in this journal and any other BMJ products and to exploit all rights, as set out in our [licence](#).

The Submitting Author accepts and understands that any supply made under these terms is made by BMJ to the Submitting Author unless you are acting as an employee on behalf of your employer or a postgraduate student of an affiliated institution which is paying any applicable article publishing charge ("APC") for Open Access articles. Where the Submitting Author wishes to make the Work available on an Open Access basis (and intends to pay the relevant APC), the terms of reuse of such Open Access shall be governed by a Creative Commons licence – details of these licences and which [Creative Commons](#) licence will apply to this Work are set out in our licence referred to above.

Other than as permitted in any relevant BMJ Author's Self Archiving Policies, I confirm this Work has not been accepted for publication elsewhere, is not being considered for publication elsewhere and does not duplicate material already published. I confirm all authors consent to publication of this Work and authorise the granting of this licence.

## Guideline-based exercise management for hip and knee osteoarthritis: differences in healthcare professional and patient beliefs

### ABSTRACT

#### Introduction

Patient beliefs regarding evidence-based treatments for osteoarthritis can be influenced by messaging from healthcare professionals. The objective of this study was to determine differences in beliefs regarding exercise for osteoarthritis among general practitioners (GPs), physiotherapists (PTs) and people with hip and knee osteoarthritis (PwOA). A secondary objective was to explore how referral patterns may influence beliefs.

#### Methods

Three online cross-sectional surveys for GPs, PTs and PwOA were advertised in Ireland via social media and healthcare networks. Nine beliefs statements related to exercise effectiveness, safety and delivery were rated on a 5-point Likert scale. Chi-square tests assessed differences in agreement between groups. Multivariable linear regression models tested associations between beliefs in PwOA and referral to/attendance at physiotherapy.

#### Results

There were 421 valid responses (n=161 GPs, n=163 PTs, n=97 PwOA). Positive consensus (>75% agreement) was reached for most statements (7/9 GPs, 6/9 PTs, 5/9 PwOA). Beliefs of PwOA were significantly less positive compared to healthcare professionals for six statements. All stakeholders disagreed that exercise is effective regardless of the level of pain. Attendance at physiotherapy (49% of PwOA), rather than referral to physiotherapy from a GP only, was associated with positive exercise beliefs for PwOA [ $\beta=0.287$  (95% CI 0.299, 1.821)].

#### Discussion

Beliefs about exercise therapy for osteoarthritis are predominantly positive across all stakeholders, albeit less positive in PwOA. PwOA are more likely to have positive beliefs if they have seen a physiotherapist for their osteoarthritis. Knowledge translation should highlight the effectiveness of exercise for all levels of pain and osteoarthritis disease.

### ***Strengths and Limitations***

- Differences in beliefs about exercise between healthcare professionals and patients with osteoarthritis has not previously been examined.
- This study also explored how healthcare professional visits may influence belief about effectiveness of evidence-based care.
- This was a cross-sectional study so no inferences can be made.
- Different results with respect to beliefs and influencers may have been found with an older group of people with osteoarthritis (i.e., 70+ years of age).

For peer review only

## INTRODUCTION

The management of hip and knee osteoarthritis (OA), as for other chronic conditions, should be determined by best available evidence, incorporating randomised controlled trials (RCTs), systematic reviews and clinical guidelines. Although there is no cure for this burdensome disease, healthcare professionals in this field have for a long time had a wealth of high-quality evidence to draw from, all pointing to optimal core clinical management that consists of land-based exercise, education and weight loss if appropriate[1,2]. Despite this, implementation of these guidelines in practice is not optimal, often resulting in care that is fragmented in nature or considered low-value [3]. A global meta-analysis involving 16,103 people with OA (PwOA) in community care, revealed that only 39% received a referral or recommendation to exercise,[4] while a UK-based survey in 2018 revealed that only 3.9% of the 502 respondents with an OA diagnosis, were using exercise as part of their management[5]. Some similarities in shortcomings to implementation of guidelines for musculoskeletal health have been identified globally[6].

Alongside use of best evidence, the provision of patient-centred care is a pillar of high-quality care that should help guide treatment for PwOA[7]. It is defined as “providing care that is respectful of and responsive to individual patient preferences, needs, and values and ensuring that patient values guide all clinical decisions”[8]. Literature and expert opinion recommendations state that it is important to assess patient ideas and concerns regarding the cause and management of their pain, and to take into account their expectations and preferences for treatment[7]. Regarding exercise, researchers have identified a considerable amount of uncertainty among PwOA regarding the benefits of exercise for their pain. Results from cross-sectional surveys and semi-structured interviews have indicated that a lack of knowledge on the condition may result in patients believing that surgery is their only option[9,10]. Furthermore, a view of OA as a “wear and tear” condition was associated with the perspective that exercise was a counterintuitive treatment[9–11]. Since it is widely understood that beliefs influence health-related behaviours [12,13], and because stronger recommendations for exercise have been made since previous publications[2,5,10], an updated understanding of how PwOA view exercise is required.

Healthcare professionals’ perceptions and beliefs will affect the advice and management they offer patients, and researchers have suggested that those with biomedical or biomechanical beliefs about OA may transfer these beliefs to their patients, thus affecting their treatment choices[14,15]. Currently, general practitioners (GPs) and physiotherapists (PTs) are considered among the core care providers for PwOA[16]. While PT’s have the knowledge and skills to adopt a key role in the management of hip and knee OA, GPs

1  
2  
3 remain the most frequently accessed source of formal medical advice and treatment[16,17].  
4 The language used by healthcare professionals, especially GPs, can have a profound  
5 influence on patients' beliefs[18,19]. A systematic review from Cottrell et al [20] in 2010,  
6 found that the attitudes and beliefs of GPs concerning exercise and chronic knee pain varied  
7 widely. An updated UK-based survey of GPs in 2017 found that perspectives were positive,  
8 with 87% reporting the use of exercise in their practice [17]. However, only 11% reported  
9 using exercise in ways that aligned with evidence-based guidelines [17]. This demonstrates  
10 the need for a better understanding of how GPs interact with up-to-date resources for care  
11 advancements for OA, in a time-demanding profession.  
12  
13

14  
15  
16  
17  
18 A scoping review of qualitative research exploring attitudes and beliefs, shows that PTs  
19 generally have a positive attitude to activity and exercise in OA management, despite  
20 indications that some PTs may also be lacking up-to-date knowledge about best practice or  
21 may not be adhering to evidence-based treatments[21]. In contrast, a recent mixed-methods  
22 evaluation by Barton et al [22] in 2021 reported that awareness regarding evidence  
23 supporting exercise for knee OA was good (89–96%) amongst PTs in Australia and Canada.  
24  
25

26  
27  
28 Some implementation strategies to improve uptake or delivery of exercise for PwOA may be  
29 in the form of education interventions to address negative beliefs or myths associated with  
30 exercise and joint pain. Greater knowledge around beliefs and belief influencers are first  
31 needed in order to target delivery of these education interventions. The primary objective of  
32 this study was to identify differences in beliefs in relation to statements on exercise for  
33 management of hip and knee OA in PwOA and healthcare professionals (GPs and PTs).  
34 Secondary objectives were to explore any associations between beliefs of PwOA and  
35 whether they had ever received a GP referral to physiotherapy or had seen a PT for their  
36 painful joint. Based on previous work [10,14,17], it was hypothesised that exercise beliefs of  
37 PTs would be more positive, and in line with clinical guidelines and latest evidence,  
38 compared to GPs and PwOA. It was also hypothesised that PwOA who had received a  
39 physiotherapy referral from their GP, or who had seen a PT for their condition would have  
40 more positive beliefs about exercise compared to those who had not.  
41  
42  
43  
44  
45  
46  
47  
48

## 49 **METHODS**

### 50 **Design and Recruitment**

51  
52 This study incorporates an analysis of three cross-sectional online surveys administered to  
53 three stakeholder groups - GPs, PTs and PwOA – in Ireland between March and September  
54 2021. This cross-sectional study is embedded in a larger study (IMPACT – Implementation  
55 of osteoarthritis clinical guidelines together)[23], that aims to co-design and evaluate  
56 implementation strategies for an exercise and education programme for PwOA in Ireland.  
57  
58  
59  
60

1  
2  
3 Surveys were adapted from previous studies in this field [10,14,17] and reviewed by co-  
4 researchers of a public and patient involvement (PPI) steering committee of representative  
5 stakeholders prior to distribution. Qualtrics© software (Qualtrics, Provo, UT) was used to  
6 administer the online surveys and all procedures were approved by the University of  
7 Limerick Faculty of Education & Health Sciences Research Ethics Committee (REC)  
8 (2020\_12\_13\_EHS) and the Irish College of General Practitioners REC  
9 (ICGP\_REC\_21\_0006). Surveys were completed anonymously after participants were  
10 provided with a participant information sheet and consent was implied by completion of the  
11 survey. Reporting is consistent with the Strengthening the Reporting of Observational  
12 Studies in Epidemiology (STROBE) guidelines for cross-sectional studies.  
13  
14

15  
16  
17  
18  
19 The PT survey was distributed via email invite to all members of the Irish Society of  
20 Chartered Physiotherapists (n=2022), working across all fields. The survey was also  
21 advertised via social media (Twitter, LinkedIn) and amongst networks of researchers and  
22 PPI steering committee members. Physiotherapists were eligible for inclusion if they: (1)  
23 were practicing in Ireland, and (2) treated a patient with hip or knee OA in the past six  
24 months. The GP survey was distributed to the Irish College of General Practitioners network  
25 (n=3152), the University of Limerick Education and Research Network for General Practice  
26 (ULEARN-GP) network[24] (n=140) and via social media (Twitter, LinkedIn). GPs were  
27 eligible to take part if they were currently treating patients with hip and/or knee pain in  
28 Ireland. The survey for PwOA was advertised via social media (Twitter, LinkedIn), Arthritis  
29 Ireland social media, News Rheum patient newsletter and colleagues and networks of  
30 project steering committee and research team members. PwOA were eligible to take part if  
31 they (1) were living on the island of Ireland, (2) at least 30 years of age, (3) had chronic hip  
32 or knee pain for at least 6 months or more, and (4) did not have joint replacement surgery on  
33 at least one of the painful hips or knees. Strategies to increase recruitment via social media  
34 across all three surveys were adopted including tagging specific advocacy groups, patient or  
35 professional organisations and influencers, providing visual infographics alongside social  
36 media posts and aligning posts with events e.g. National Arthritis Day.  
37  
38  
39  
40  
41  
42  
43  
44  
45  
46  
47  
48

## 49 **Outcomes**

50  
51 Each survey (Supplementary file 1) included an initial set of questions related to participant  
52 demographics. For healthcare professionals, these included questions on sex [are you: (1)  
53 Male, (2) Female, (3) Prefer not to say], length of time qualified, work setting, details of  
54 specific post-qualification training related to OA/chronic pain, confidence in treating hip and  
55 knee OA, percentage of typical caseload with hip or knee OA and where they prefer to  
56 access knowledge of management for persons with hip or knee OA. For PwOA,  
57  
58  
59  
60



1  
2  
3 demographic information related to sex [are you: (1) Male, (2) Female, (3) Prefer not to say],  
4 age category, geographical area and health conditions were asked. In relation to joint pain,  
5 questions regarding location, duration, severity, referrals to exercise, and use of clinical  
6 guideline specific treatments (muscle strengthening, aerobic exercise, education, weight  
7 loss) were asked. Additional questions were provided for PwOA to understand healthcare  
8 utilisation and previous experiences with exercise.  
9  
10  
11  
12

13 In each survey, a list of statements on exercise beliefs for hip and knee OA were provided  
14 and were rated on a 5-point Likert scale from strongly agree to strongly disagree. The belief  
15 statements were intended to align with current evidence-based guidelines[1,2] for exercise  
16 and OA. Healthcare professionals were given a more extensive list of statements that were  
17 related to exercise type or referral decisions. A final section related to barriers and enablers  
18 to exercise delivery, referral or uptake was included in each survey. Results of that analysis  
19 are presented elsewhere.  
20  
21  
22  
23  
24

### 25 **Statistical Analysis**

26  
27 Demographic outcomes were summarised as counts/proportions as appropriate. Belief  
28 statements were grouped and summarised descriptively by theme i.e., exercise type and  
29 effectiveness, exercise safety and exercise delivery. Although some statements had slightly  
30 different wording to facilitate understanding and relevance to each group, there were nine  
31 statements that were deemed to be comparable across groups and used to analyse  
32 differences in beliefs. Responses for the 5-point Likert scale statements were collapsed to a  
33 binary scale to label positive beliefs (“strongly agree” or “somewhat agree”) vs. negative  
34 beliefs (“strongly disagree”, “somewhat disagree” or “neither”). A commonly defined cut-off  
35 for consensus (>75%)[25] between stakeholders was used. Chi-square (2 x 3) tests of  
36 independence were used to assess differences in agreement with statements between three  
37 groups, and Bonferroni adjustment for between-group differences ( $p < 0.05$ ). Multivariable  
38 linear regression was used to explore associations between exercise beliefs (number of  
39 statements agreed with (range 0-9)) in PwOA and (1) physiotherapy referral from their GP  
40 (*Has your GP ever referred you to a physiotherapist for your painful joint? Yes/No*), and (2)  
41 physiotherapy attendance (*Have you seen a physiotherapist for your painful joint? Yes/No*).  
42 Histograms, Kolmogorov-Smirnov tests and scatter plots of residuals vs. fitted values were  
43 used to test assumptions of Poisson and linear regression and linear regression was  
44 deemed more appropriate. Pearson correlation coefficients ( $r > 0.5$ ) and variance inflation  
45 factor ( $> 5$ ) were used to determine presence of collinearity between variables. The following  
46 covariates were included using an enter method in each model: sex, average pain rating  
47 (none/mild/moderate/severe), pain duration (6 months-1 year /1-2 years /2-3 years /3-4  
48  
49  
50  
51  
52  
53  
54  
55  
56  
57  
58  
59  
60

years /4+ years) and number of comorbidities. The most parsimonious models were reported checking for a 10% difference in beta coefficients upon removal of covariates ( $p>0.05$ ). Data were analysed using IBM-SPSS version 26.0.0 and Microsoft Excel365.

## RESULTS

There was a total of 421 valid responses from the three distributed surveys, comprising 161 GPs, 163 PTs and 97 PwOA. An additional 26 GP, 33 PT and 15 PwOA surveys were collected but were not fully completed or did not contain sufficient data for analysis so were excluded. Demographic data for each stakeholder are presented in **Table 1**.

### Experiences with Exercise for People with Osteoarthritis

Of the 97 PwOA, 78.4% had spoken to their GP regarding their joint pain, 63.9% had an X-ray of their joint and 48.5% had either been referred to physiotherapy or chosen to self-refer privately. Additionally, 50.5% reported having been given specific exercises for their joint by any healthcare professional. All but 5 respondents reported that this healthcare professional was a physiotherapist. Others included orthopaedic surgeon ( $n=2$ ), rheumatologist ( $n=1$ ) and GP ( $n=1$ ). **Figure 1** shows answers to questions regarding the types of treatments tried by PwOA, as per clinical guideline recommendations (aerobic exercise, strengthening exercise, education and weight management).

### Stakeholder Beliefs about Exercise Type and Effectiveness, Exercise Safety and Delivery

**Figure 2 (a-d)** shows the Likert scale results in each stakeholder group for statements related to the effectiveness of different types of exercise and for different levels of pain or perceived severity. **Figure 2 (e-i)** shows the Likert scale results in each stakeholder group for statements related to the safety and delivery of different types of exercise for people with OA. Beliefs were predominantly positive amongst GP's [positive consensus ( $>75\%$  agreement) on 7/9 statements], PTs (6/9 statements) and PwOA (5/9 statements). Results of chi-square tests for differences in agreement between stakeholders across beliefs statements are presented in **Table 2**. There were differences in stakeholder responses across all statements, except for statement (d): "*Exercise works just as well for everybody, regardless of the amount of pain they have*" ( $X^2 = 5.14$ ,  $p=0.076$ ). All three stakeholder groups reached a negative consensus regarding this statement. In six of the eight statements where differences were observed, patient beliefs were significantly different to healthcare professional beliefs. There were two statements with a medium effect size for differences between PwOA and service providers: statements (b) "*Hip and knee problems can be improved by specific muscle strengthening exercises*" ( $V=0.309$ ) and (h) "*Most*

patients with hip or knee OA would benefit from a supervised group exercise programme” (V=0.384). All other differences had a small effect size.

**Table 1.** Descriptive statistics using count (proportions) for healthcare professionals and people with osteoarthritis demographics

| Healthcare Professionals Demographics                   | GP (n=161) | PT (n=163) | People with Hip or Knee Osteoarthritis Demographics | PwOA N=97 |
|---------------------------------------------------------|------------|------------|-----------------------------------------------------|-----------|
|                                                         | Count (%)  | Count (%)  |                                                     | Count (%) |
| <b>Sex:</b>                                             |            |            | <b>Sex:</b>                                         |           |
| Female                                                  | 88 (54.7)  | 128 (78.5) | Female                                              | 76 (78.4) |
| Male                                                    | 72 (44.7)  | 34 (20.9)  | Male                                                | 20 (20.6) |
| Prefer not to say                                       | 1 (0.6)    | 1 (0.6)    | Prefer not to say                                   | 1 (1.0)   |
| <b>How long have you been qualified?</b>                |            |            | <b>Most bothersome joint:</b>                       |           |
| Less than 5 years                                       | 33 (20.5)  | 19 (11.7)  | Knee                                                | 52 (53.8) |
| 5-10 years                                              | 25 (15.5)  | 21 (12.9)  | Hip                                                 | 45 (46.4) |
| More than 10 years                                      | 103 (64.0) | 123 (75.5) | <b>Age Category:</b>                                |           |
| <b>Work practice setting (GPs)</b>                      |            |            | 30-39 years                                         | 12 (12.4) |
| Urban                                                   | 60 (37.3)  | -          | 40-49 years                                         | 24 (24.7) |
| Rural                                                   | 34 (21.1)  | -          | 50-59 years                                         | 30 (30.9) |
| Mixed                                                   | 67 (41.6)  | -          | 60-69 years                                         | 25 (25.8) |
| <b>Work practice setting (PTs)</b>                      |            |            | 70-79 years                                         | 6 (6.2)   |
| Public hospital                                         | -          | 38 (23.3)  | <b>Living Location:</b>                             |           |
| Private hospital                                        | -          | 7 (4.3)    | Inner city or suburb                                | 46 (47.4) |
| Primary care                                            | -          | 41 (25.2)  | Town                                                | 16 (16.5) |
| Private practice clinic                                 | -          | 70 (42.9)  | Village                                             | 15 (15.5) |
| Other                                                   | -          | 7 (4.3)    | Open country                                        | 20 (20.6) |
| <b>Post-qualification training on OA / chronic pain</b> |            |            | <b>No. of other comorbidities:</b>                  |           |
| No                                                      | 72 (44.7)  | 37 (22.7)  | 0                                                   | 31 (32.0) |
| Inservice/webinars/reading                              | 32 (19.9)  | 17 (10.4)  | 1-2                                                 | 45 (47.9) |
| Course or conference                                    | 28 (17.4)  | 72 (44.2)  | 3+                                                  | 18 (19.1) |
| Diploma/APP or certification                            | 15 (9.3)   | 3 (1.8)    | <b>Multi-joint pain(&gt;1):</b>                     |           |
| MSc in related field                                    | 14 (8.7)   | 32 (19.6)  | No                                                  | 6 (6.2)   |
| PhD in related field                                    | 0          | 2 (1.2)    | Yes                                                 | 91 (93.8) |
| <b>Confidence in treating hip and knee OA</b>           |            |            | <b>Rating of pain /symptoms on an average day</b>   |           |
| Not confident                                           | 2 (1.2)    | 0          | No pain/symptoms                                    | 1 (1.0)   |
| Slightly confident                                      | 33 (20.5)  | 5 (3.1)    | Mild                                                | 30 (30.9) |
| Confident                                               | 80 (49.7)  | 41 (25.2)  | Moderate                                            | 49 (50.5) |
| Very confident                                          | 36 (22.4)  | 86 (52.8)  | Severe                                              | 17 (17.5) |
| Extremely confident                                     | 10 (6.2)   | 31 (19.0)  | <b>Duration of pain</b>                             |           |
| <b>% of typical caseload with hip/knee OA</b>           |            |            | 6 mon – 1 year                                      | 24 (24.7) |
| 1-5%                                                    | 19 (11.8)  | 19 (11.7)  | 1-2 years                                           | 13 (13.4) |
| 6-25%                                                   | 117 (72.7) | 83 (50.9)  | 2-3 years                                           | 15 (15.5) |
| 26-50%                                                  | 24 (14.9)  | 36 (22.1)  | 3-4 years                                           | 11 (11.3) |
| 51-75%                                                  | 1 (0.6)    | 18 (11.0)  | More than 4 years                                   | 34 (35.1) |
| >75%                                                    | 0          | 5 (3.1)    |                                                     |           |

APP, Advanced Practice Physiotherapist; GP, General Practitioner; OA, Osteoarthritis; PT, Physiotherapist; PwOA, People with Osteoarthritis.

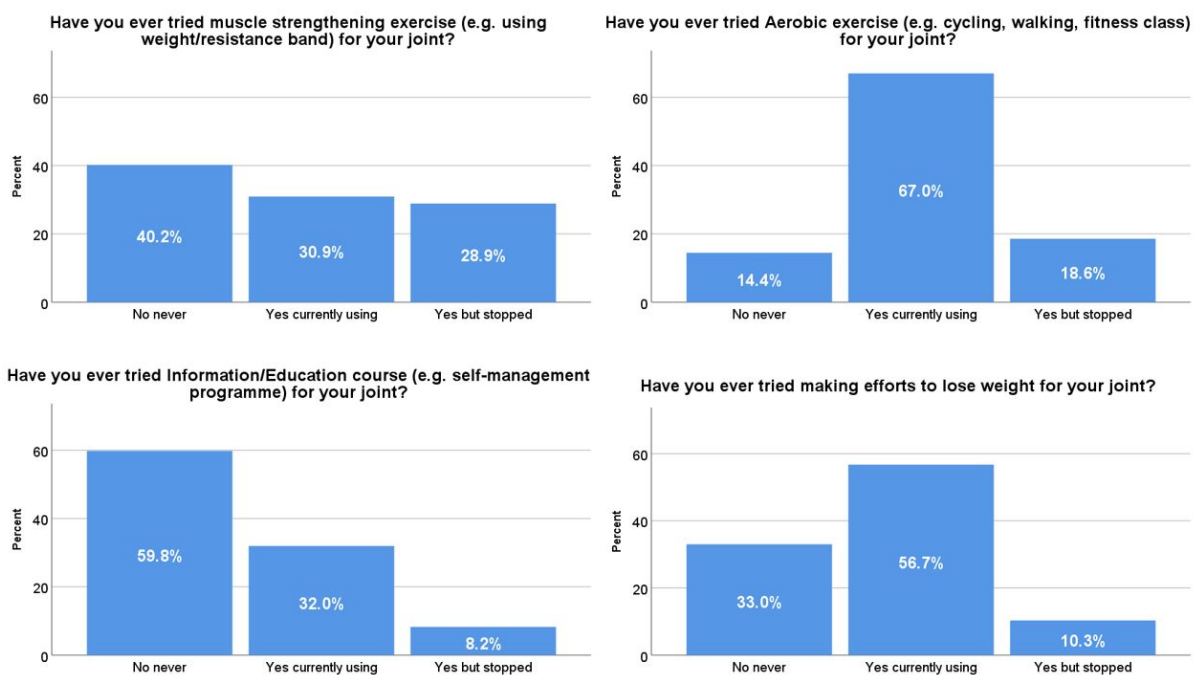

**Figure 1.** Proportion of responses to guideline-based treatments people with osteoarthritis (n=97) have tried

Peer review only

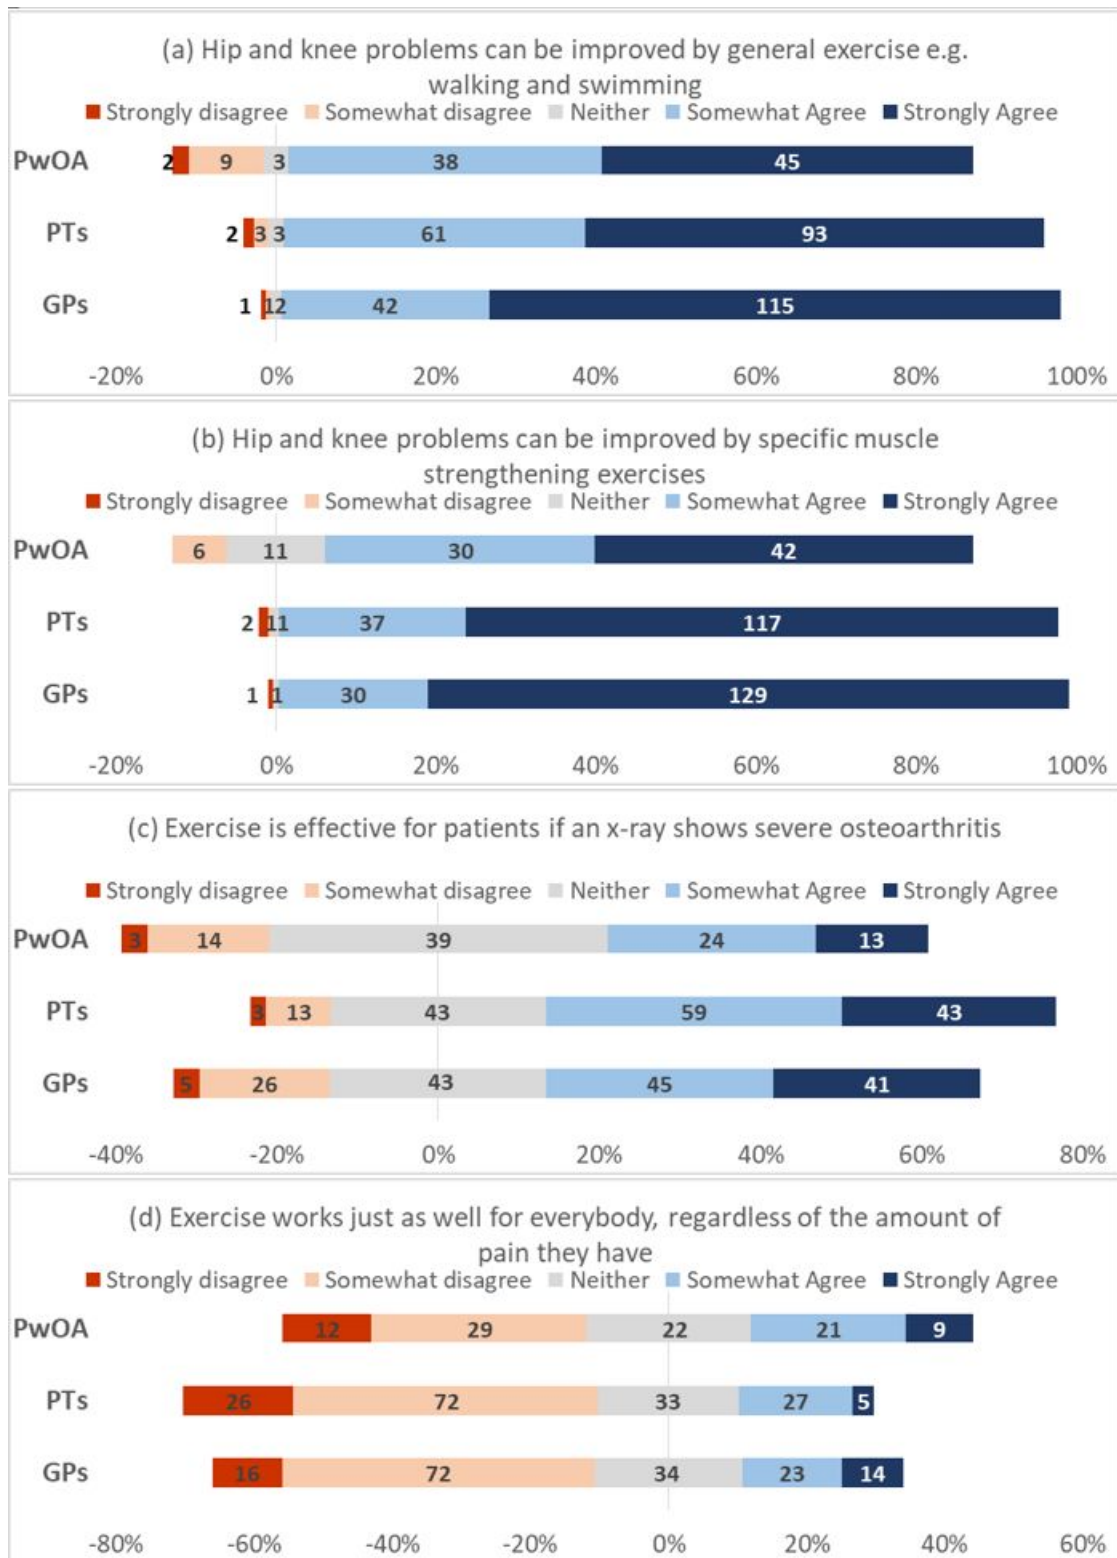

**Figure 2 (a-d).** 100% stacked bar chart showing Likert scale results with count for each stakeholder on belief statements related to exercise effectiveness. GP, general practitioner; PT, physiotherapist; PwOA, people with osteoarthritis.

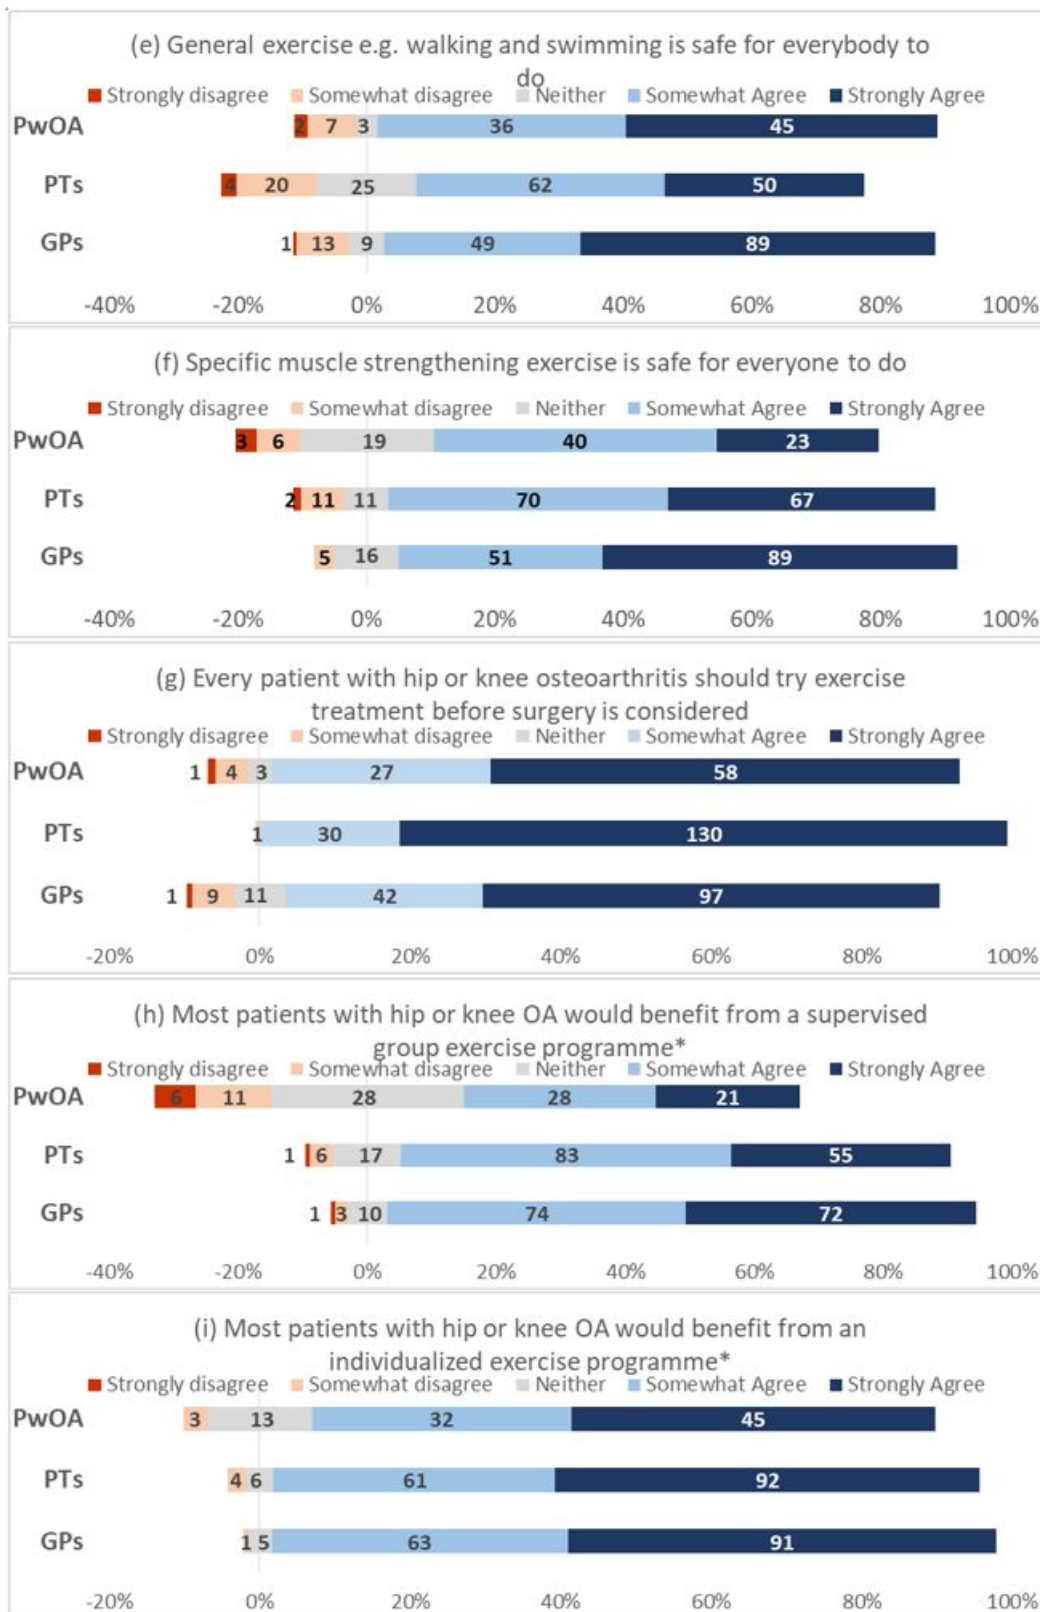

**Figure 2 (e-i).** 100% stacked bar chart showing Likert scale results with count for each stakeholder on belief statements related to exercise safety and delivery. \*Questions for PwOA phrased slightly differently: “The best way to learn about exercise is in a supervised group setting with people who have similar pain” and “The best way to learn about exercise is in a one-on-one setting with a health professional”. GP, general practitioner; PT, physiotherapist; PwOA, people with osteoarthritis.

**Table 2.** Differences in agreement with statements between general practitioner (GP; n=161), physiotherapist (PT; n=163) and people with hip and knee osteoarthritis (PwOA; n=97). Agreement was defined as those who selected “strongly agree” or “somewhat agree” on Likert scales. Proportions that reached “consensus”, defined as >75% majority, are in bold.

| Statement                                                                                               | Proportion in agreement |                          |                          | Chi-Square | Significance | Cramer's V |
|---------------------------------------------------------------------------------------------------------|-------------------------|--------------------------|--------------------------|------------|--------------|------------|
|                                                                                                         | GP                      | PT                       | PwOA                     |            |              |            |
| <b>(a) Hip and knee problems can be improved by general exercise e.g. walking and swimming</b>          | <b>97.5%</b>            | <b>95.1%</b>             | <b>85.6%<sup>a</sup></b> | 15.59      | <0.0001      | 0.193      |
| <b>(b) Hip and knee problems can be improved by specific muscle strengthening exercises</b>             | <b>98.8%</b>            | <b>97.5%</b>             | <b>80.9%<sup>a</sup></b> | 39.04      | <0.0001      | 0.309      |
| <b>(c) Exercise is effective for patients if an x-ray shows severe osteoarthritis</b>                   | 53.8%                   | 63.4%                    | 39.8% <sup>c</sup>       | 13.24      | 0.001        | 0.179      |
| <b>(d) Exercise works just as well for everybody, regardless of the amount of pain they have</b>        | <b>24.2%</b>            | <b>19.6%</b>             | 32.3%                    | 5.14       | 0.076        | n/a        |
| <b>(e) General exercise e.g., walking and swimming is safe for everybody to do</b>                      | <b>85.7%</b>            | 68.9% <sup>b</sup>       | <b>87.1%</b>             | 18.13      | <0.0001      | 0.209      |
| <b>(f) Specific muscle strengthening exercise is safe for everyone to do</b>                            | <b>85.6%</b>            | <b>84.5%</b>             | 69.2% <sup>a</sup>       | 11.86      | 0.003        | 0.170      |
| <b>(g) Every patient with hip or knee OA should try exercise treatment before surgery is considered</b> | <b>86.9%</b>            | <b>99.4%<sup>b</sup></b> | <b>91.4%</b>             | 19.0       | <0.0001      | 0.214      |
| <b>(h) Most patients with hip or knee OA would benefit from a supervised group exercise programme*</b>  | <b>91.3%</b>            | <b>85.3%</b>             | 52.1% <sup>a</sup>       | 61.35      | <0.0001      | 0.384      |
| <b>(i) Most patients with hip or knee OA would benefit from an individualized exercise programme*</b>   | <b>96.3%</b>            | <b>93.9%</b>             | <b>82.8%<sup>a</sup></b> | 15.91      | <0.0001      | 0.196      |

<sup>a</sup>Significantly different compared to GP and PT, <sup>b</sup>significantly different to GP and PwOA, <sup>c</sup>significantly different to PT, using Bonferroni at .05 level. \*Questions for PwOA phrased as: “The best way to learn about exercise is in a supervised group setting with people who have similar pain” and “The best way to learn about exercise is in a one-on-one setting with a health professional”. Cramer's V =0.1 small, 0.3 medium, 0.5 large effect size. GP, general practitioner; OA, osteoarthritis; PT, physiotherapist; PwOA, people with osteoarthritis.

## Predictors of Patient Beliefs

There was no association between beliefs of PwOA about exercise and the question: “has your GP ever referred you to a physiotherapist for your painful joint?” (**Supplemental File 2**) [B=0.46 (95% CI -0.35, 1.27)]. In this model, sex (male) [B=-1.01 (95% CI -2.01, -0.01)] and a higher number of comorbidities [B=-0.36 (95% CI -0.62, -0.11)] were negatively associated with beliefs about exercise. In model 2, there was a positive association between beliefs of PwOA about exercise and the question: “Have you seen a physiotherapist for your painful joint?” [B=1.06 (95% CI 0.30, 1.82)]. Sex (male) [B=-0.72 (95% CI -1.44, -0.00)], a longer duration of pain and symptoms [B=-0.20 (95% CI -0.40, -0.01)] and a higher number of

1  
2  
3 comorbidities [B=-0.29 (95% CI -0.53, -0.06)] were negatively associated with beliefs about  
4 exercise in this model.  
5

### 6 **Healthcare Professional Sources of Education**

7  
8  
9 For the question, “Where do you get your knowledge of care advancements for persons with  
10 knee or hip osteoarthritis?”; the top five selected responses for GPs were continuous  
11 medical education (CME) or GP training networks (78%), published guidelines or  
12 recommendations (61%), reading medical journals (47%), conference attendance (47%) and  
13 course attendance (31%). For the question, “Where do you access your knowledge of  
14 management for persons with knee or hip osteoarthritis?”; the top five selected responses  
15 for PTs were published guidelines or recommendations (85%), reading research articles  
16 (75%), clinic protocols and discussion with peers or in-services (70%), course attendance  
17 (61%) and conference attendance (47%).  
18  
19  
20  
21  
22  
23  
24  
25  
26  
27

## 28 **DISCUSSION**

29  
30 This research identified differences in beliefs about exercise effectiveness, safety and  
31 delivery between healthcare professionals and PwOA. While predominantly positive beliefs  
32 were observed across stakeholders, there was less consensus regarding the effectiveness  
33 of exercise when an X-ray shows “severe” OA. With regards to exercise referral, 48.5% of  
34 PwOA had either been referred to or self-referred to a physiotherapist for their joint pain.  
35 Referral to a physiotherapist by their GP was not associated with positive exercise beliefs.  
36 However, attendance at a physiotherapist for joint pain was associated with positive exercise  
37 beliefs in PwOA.  
38  
39  
40  
41  
42

43 If OA management guidelines do not align with the personal beliefs of service providers or  
44 users, PwOA may not receive high quality care. This study has found that GPs (7/9  
45 statements), PTs (6/9 statements) and PwOA (5/9 statements) have largely positive beliefs  
46 regarding exercise for OA. However, there is less certainty about exercise when an X-ray  
47 shows “severe osteoarthritis” across all stakeholders, and service providers do not agree  
48 that “*exercise works just as well for everybody, regardless of the level of pain they have*”.  
49 These results highlight that beliefs are generally in line with best evidence and clinical  
50 guidelines. However, there may still be some misconceptions about the effectiveness of  
51 exercise for higher levels of pain and disease. Evidence suggests that the pain-relieving  
52 qualities of exercise are effective for even moderate to severe OA disease[26–28], and a  
53 more recent meta-analysis has shown that individuals with higher pain severity at baseline  
54  
55  
56  
57  
58  
59  
60



1  
2  
3 benefit more from therapeutic exercise than those with lower pain[29]. This evidence should  
4 be a focus of future efforts of knowledge translation to clinicians and PwOA.  
5  
6

7 Some of the beliefs identified in this study are reflective of the traditional view of OA as a  
8 “wear and tear” disease, synonymous with a desire to protect a “damaged” joint on X-ray  
9 from further damage, as found previously[9,21]. However, an encouraging finding from this  
10 research are the overwhelmingly more positive views towards exercise observed compared  
11 to similar studies published on a cohort of UK-based PTs in 2009[14], older adults with knee  
12 pain in 2012[10] and GPs in 2017[17]. Using the comparator of statements with at least  
13 majority view (>50% agreement), in the 2009 study[14], PTs agreed on the benefit of  
14 exercise for knee pain on 4/12 statements (33%), compared to 8/9 similar statements (89%)  
15 in the current study. For older adults with knee pain, there was no agreement for any  
16 statement in the 2012 study[10], compared to 7/9 statements (78%) in the current study. In  
17 the 2017 study[17], GPs agreed on 9/12 statements (75%), compared to 8/9 statements  
18 (89%) in the current study. While some statements varied slightly, stronger exercise  
19 recommendations in clinical guidelines and greater efforts in implementation and translation  
20 to practice in the last 10 years are likely the rationale for these changes, particularly since  
21 clinical guideline updates in 2014[1,2]. However, there is still much space to enact  
22 recommendations from a 2018 Cochrane review to provide better information and advice  
23 about the safety and value of exercise for patients[30]. In particular, providing reassurance  
24 on the role of exercise in managing symptoms, and discussion of opportunities to participate  
25 in activities regarded as enjoyable and relevant, may encourage greater exercise  
26 participation[30].  
27  
28  
29  
30  
31  
32  
33  
34  
35  
36  
37  
38

39 Beliefs of PwOA about exercise were significantly less positive compared to healthcare  
40 professional beliefs for 6/9 statements. The greatest differences were observed for  
41 statements in relation to the benefits of strengthening exercises and group-based exercise.  
42 Given 40% had never tried weight or strength-based training for their joint, and an additional  
43 28% tried, but since stopped this type of exercise, healthcare professionals should be  
44 cognisant of ensuring patients understand the benefit of muscle strengthening and support  
45 patients to find enjoyable and sustainable ways to build these exercises into weekly routines.  
46 While strength-based training is not deemed superior to aerobic type exercise for pain relief  
47 in OA[26,31], knock-on benefits for improvements in physical function, longevity, bone  
48 health, and frailty[32] during ageing are important to highlight. Results for aerobic type  
49 exercise, however, were much more promising as only 14% had not tried this type of  
50 exercise for their joint and 67% were actively using. Further exploration on reasons for  
51 stopping exercise would be of benefit to determine if low adherence is related to barriers to  
52 exercise participation or a lack of perceived improvement in symptoms. While there is no  
53  
54  
55  
56  
57  
58  
59  
60

1  
2  
3 strong evidence to indicate a difference in effectiveness regarding exercise setting, PwOA  
4 were less likely to agree with the benefits of a supervised group setting compared to service  
5 providers. Additional benefits of group exercise for older adults, such as social support,  
6 improvements in mental health and loneliness, and cost-effectiveness should, however, be  
7 considered and encouraged[33–35].  
8  
9  
10

11 In this study, referral to physiotherapy by a GP was not associated with more positive  
12 exercise beliefs in PwOA, in contrast to what was hypothesised. Although GPs had the most  
13 positive beliefs in comparison with other stakeholders, this finding may reflect the lack of  
14 time in a GP consultation to educate about exercise therapy and influence patient beliefs. A  
15 referral to exercise therapy alone may not be enough. However, seeing a PT for  
16 osteoarthritis was associated with more positive exercise beliefs. This may suggest that PTs  
17 impart important knowledge and education regarding the benefits of exercise to their  
18 patients, that, in turn, changes patient beliefs. Equally, this finding may suggest that PwOA  
19 with more positive exercise beliefs are more likely to attend a PT appointment. Tracking of  
20 changes in beliefs over time is recommended to further explore this association. Compared  
21 to GPs, PTs have more time in a consultation to discuss the effectiveness, mechanism, and  
22 safety of exercise for joint pain, which may help to influence beliefs and maximise the  
23 potential effect of exercise programs by improving adherence[36]. It is known that the  
24 provision of education for OA is superior for patient outcomes when combined with exercise  
25 therapy[37]. Almost 60% of PwOA reported having not tried self-management/education,  
26 despite some programme availability in Ireland[38]. PwOA were not asked specifically if their  
27 GP referred them to a self-management programme, which is a required area of further  
28 exploration. Additional efforts are required to support clinicians with resources to deliver  
29 trustworthy educational content for PwOA (cite Bhardwaj et al PT facilitator if published on  
30 time), or increase knowledge of available self-management programmes, to ensure clinical  
31 recommendations are fully implemented.  
32  
33  
34  
35  
36  
37  
38  
39  
40  
41  
42  
43  
44

45 In the current study, 78% of PwOA had spoken to their GP about their joint pain, while under  
46 50% had been referred to, or self-referred to a PT. Despite OA being amongst the leading  
47 causes of years lived with disability[39], the decision to seek care can be deterred by  
48 negative or dismissive attitudes from healthcare professionals about their non-urgent  
49 condition, or the perception that pain is part of ageing[40]. Healthcare professionals should  
50 take care regarding attitudes and language use during consultations[41] to help promote the  
51 effectiveness of first-line treatment strategies. From the regression analysis, it is also  
52 apparent that men with OA, and people with multiple comorbidities, may require additional  
53 supports to improve positive beliefs about exercise for their condition. Men are at times  
54 considered 'hard to reach' in terms of meaningful engagement with exercise programmes  
55  
56  
57  
58  
59  
60

1  
2  
3 [42]. For men who do not engage with healthcare services, a suggested route for information  
4 may instead be community support groups or sport organisations, where messaging is  
5 provided by someone who recipients can relate to and get along with[42]. For people living  
6 with the burden of multiple conditions, additional barriers to exercise may require thorough  
7 training of facilitators[43].  
8  
9  
10

11 This study has shown that the most used education sources for healthcare professionals on  
12 management of OA are: published guidelines or recommendations (85% of PTs, 61% of  
13 GPs), use of training networks, in-clinic protocols, discussion and in-services (70% of PTs,  
14 78% of GPs) and reading medical journals or research articles (75% of PTs, 47% of GPs).  
15 Even where clinicians report using clinical guidelines and research to guide practice, this is  
16 no guarantee that the most up-to-date recommendations are being used with confidence, or  
17 that they are being interpreted, recalled or implemented appropriately[44]. In contrast to this  
18 study, previous international investigations have shown that only a small proportion of sport  
19 and musculoskeletal PTs use research articles to change their clinical practice (10.4%)[45].  
20 Over half of PTs instead cited “interactions with colleagues” and “attending private education  
21 short courses” as the source for change[45]. Given the high proportion of GPs that use CME  
22 small groups and training networks, peer-learning opportunities may be a viable source of  
23 intervention to ensure practice guidelines are being met[46]. The evidence to practice gap  
24 could be filled with clinical guideline supplements that address contextual barriers and time  
25 needed to treat[47], and courses/training that include opportunities to discuss real-world  
26 implementation of evidence with experienced colleagues and experts, with input from  
27 patients on delivery needs.  
28  
29  
30  
31  
32  
33  
34  
35  
36  
37  
38

39 While efforts were made to recruit participants for this research from multiple diverse  
40 sources, this study was not a representative sample. Most PwOA were in the 50–59-year  
41 age category with moderate joint pain. While prevalence of OA is higher in older age  
42 categories, the sample recruited is likely reflective of the online nature of participation, wide  
43 inclusion criteria (age 30+ years) and exclusion criteria for previous joint replacement  
44 surgery. Due to the timing of survey administration (during COVID-19 pandemic lockdown),  
45 traditional survey advertising methods such as GP and health clinic waiting rooms were not  
46 utilised. Completion of an anonymous survey has benefits as results cannot be influenced,  
47 however if there was any confusion related to phrasing of a certain question or statement,  
48 then this could not be clarified. The selection of other belief statements about exercise may  
49 have yielded different results. Future research should also investigate similar beliefs using  
50 qualitative approach to allow for more context to these answers.  
51  
52  
53  
54  
55  
56  
57  
58

## 59 **Conclusion**

60

1  
2  
3 Beliefs of healthcare professionals and PwOA regarding exercise as a treatment for hip and  
4 knee OA have likely become more positive in recent years. However, there is still much  
5 scope for service improvement, with less than 50% of PwOA having seen a PT for their joint  
6 pain and all stakeholders in disagreement with statements relating to effectiveness of  
7 exercise for severe joint pain. Knowledge translation activities should be aimed at increasing  
8 knowledge and improving access to evidence-based exercise therapies, using stakeholder  
9 co-design to provide context on barriers and facilitators.  
10  
11  
12  
13

### 14 **Author roles**

15  
16  
17 Toomey CM: Conceptualization, Methodology, Formal Analysis, Supervision, Writing –  
18 Original Draft. Higgins N: Methodology, Formal Analysis, Writing – Reviewing & Editing;  
19 Wood-Thornsbury A: Methodology, Formal Analysis, Writing – Reviewing & Editing; Rector  
20 J: Methodology, Formal Analysis, Writing – Reviewing & Editing; Bhardwaj A: Methodology,  
21 Writing – Review & Editing; Hayes P: Methodology, Writing – Review & Editing; Browne J:  
22 Methodology, Writing – Review & Editing; Grealis S: Methodology, Writing – Review &  
23 Editing; Maguire D: Methodology, Writing – Review & Editing; O’Hora J: Methodology,  
24 Writing – Review & Editing; Dowling I: Methodology, Writing – Review & Editing; Kennedy N:  
25 Conceptualization, Supervision, Writing – Review & Editing.  
26  
27  
28  
29  
30  
31

32 **Competing Interests** – none to declare.  
33

34 **Funding** - Funding for this project (IMPACT), salary of the PI (CMT) and student fees and  
35 stipend (AB) from Health Research Board (Ireland) Emerging Investigator Award, awarded  
36 to CMT (EIA-2019-008).  
37  
38  
39

### 40 **REFERENCES**

- 41  
42 1 McAlindon TE, Bannuru RR, Sullivan MC, *et al.* OARSI guidelines for the non-surgical  
43 management of knee osteoarthritis. *Osteoarthr Cartil* 2014;**22**:363–88.  
44 doi:10.1016/j.joca.2014.01.003  
45  
46  
47 2 National Institute for Health & Clinical Excellence. Osteoarthritis: care and  
48 management. London: 2014.  
49  
50  
51 3 Hunter DJ. Osteoarthritis: time for us all to shift the needle. *Rheumatology*  
52 2018;**57**:iv1–2. doi:10.1093/rheumatology/key065  
53  
54  
55 4 Hagen REB, Smedslund G, Østeras N, *et al.* Quality of Community-Based  
56 Osteoarthritis Care : A Systematic Review and Meta-Analysis. *Arthritis Care Res*  
57 2016;**68**:1443–52. doi:10.1002/acr.22891  
58  
59  
60

- 1  
2  
3 5 Healey EL, Afolabi EK, Lewis M, *et al.* Uptake of the NICE osteoarthritis guidelines in  
4 primary care: a survey of older adults with joint pain. *BMC Musculoskelet Disord*  
5 2018;**19**:295. doi:10.1186/s12891-018-2196-2  
6  
7  
8 6 Briggs AM, Jordan JE, Kopansky-Giles D, *et al.* The need for adaptable global  
9 guidance in health systems strengthening for musculoskeletal health: a qualitative  
10 study of international key informants. *Glob Heal Res policy* 2021;**6**:24.  
11 doi:10.1186/s41256-021-00201-7  
12  
13  
14  
15 7 Geenen R, Overman CL, Christensen R, *et al.* EULAR recommendations for the  
16 health professional's approach to pain management in inflammatory arthritis and  
17 osteoarthritis. *Ann Rheum Dis* 2018;**77**:797–807. doi:10.1136/annrheumdis-2017-  
18 212662  
19  
20  
21  
22 8 Décary S, Toupin-April K, Légaré F, *et al.* Five Golden Rings to Measure Patient-  
23 Centered Care in Rheumatology. *Arthritis Care Res (Hoboken)* 2020;**72 Suppl**  
24 **10**:686–702. doi:10.1002/acr.24244  
25  
26  
27  
28 9 Darlow B, Brown M, Thompson B, *et al.* Living with osteoarthritis is a balancing act :  
29 an exploration of patients ' beliefs about knee pain. *BMC Rheumatol* 2018;**2**.  
30 doi:10.1186/s41927-018-0023-x BMC  
31  
32  
33 10 Holden MA, Nicholls EE, Young J, *et al.* Role of Exercise for Knee Pain : What Do  
34 Older Adults in the Community Think ? *Arthritis Care Res* 2012;**64**:1554–64.  
35 doi:10.1002/acr.21700  
36  
37  
38  
39 11 Bunzli S, Brien PO, Ayton D, *et al.* Misconceptions and the Acceptance of Evidence-  
40 based Nonsurgical Interventions for Knee Osteoarthritis . A Qualitative Study. *Clin*  
41 *Orthop Relat Res* 2019;**477**:1975–83. doi:10.1097/CORR.0000000000000784  
42  
43  
44 12 Armitage CJ, Conner M. Social cognition models and health behaviour: A structured  
45 review. *Psychol Health* 2000;**15**:173–89. doi:10.1080/08870440008400299  
46  
47  
48 13 Hurley M V, Walsh N, Bhavnani V, *et al.* Health beliefs before and after participation  
49 on an exercised-based rehabilitation programme for chronic knee pain: Doing is  
50 believing. *BMC Musculoskelet Disord* 2010;**11**:31. doi:10.1186/1471-2474-11-31  
51  
52  
53 14 Holden MA, Nicholls EE, Young J, *et al.* UK-Based Physical Therapists ' Attitudes and  
54 Beliefs Regarding Exercise and Knee Osteoarthritis : Findings From a Mixed-Methods  
55 Study. *Arthritis Care Res* 2009;**61**:1511–21. doi:10.1002/art.24829  
56  
57  
58 15 Hunter DJ. Osteoarthritis Management: Time to Change the Deck. *J Orthop Sports*  
59  
60

- 1  
2  
3  
4  
5  
6  
7  
8  
9  
10  
11  
12  
13  
14  
15  
16  
17  
18  
19  
20  
21  
22  
23  
24  
25  
26  
27  
28  
29  
30  
31  
32  
33  
34  
35  
36  
37  
38  
39  
40  
41  
42  
43  
44  
45  
46  
47  
48  
49  
50  
51  
52  
53  
54  
55  
56  
57  
58  
59  
60
- Phys Ther* 2017;**47**:370–2. doi:10.2519/jospt.2017.0605
- 16 Briggs AM, Hinman RS, Darlow B, *et al.* Confidence and Attitudes Toward Osteoarthritis Care Among the Current and Emerging Health Workforce: A Multinational Interprofessional Study. *ACR open Rheumatol* 2019;**1**:219–35. doi:10.1002/acr2.1032
- 17 Cottrell E, Foster NE, Porcheret M, *et al.* GPs' attitudes, beliefs and behaviours regarding exercise for chronic knee pain: a questionnaire survey. *BMJ Open* 2017;**7**. doi:10.1136/bmjopen-2016-014999
- 18 MacKay C, Hawker GA, Jaglal SB. Qualitative study exploring the factors influencing physical therapy management of early knee osteoarthritis in Canada. *BMJ Open* 2018;**8**. doi:10.1136/bmjopen-2018-023457
- 19 Barker KL, Reid M, Minns Lowe CJ. What does the language we use about arthritis mean to people who have osteoarthritis? A qualitative study. *Disabil Rehabil* 2014;**36**:367–72. doi:10.3109/09638288.2013.793409
- 20 Cottrell E, Roddy E, Foster N. The attitudes, beliefs and behaviours of GPs regarding exercise for chronic knee pain: a systematic review. *BMC Fam Pract* 2010;**11**.<http://www.doaj.org/doaj?func=abstract&id=516161>
- 21 Nissen N, Holm PM, Bricca A, *et al.* Clinicians' beliefs and attitudes to physical activity and exercise therapy as treatment for knee and/or hip osteoarthritis: a scoping review. *Osteoarthr Cartil* 2022;**30**:260–9. doi:10.1016/j.joca.2021.11.008
- 22 Barton CJ, Ezzat AM, Bell EC, *et al.* Knowledge, confidence and learning needs of physiotherapists treating persistent knee pain in Australia and Canada: a mixed-methods study. *Physiother Theory Pract* 2021;**1**–13. doi:10.1080/09593985.2021.1906805
- 23 Toomey CM, Kennedy N, Macfarlane A, *et al.* Implementation of clinical guidelines for osteoarthritis together (IMPACT): protocol for a participatory health research approach to implementing high value care. *BMC Musculoskelet Disord* 2022;**23**. doi:10.1186/s12891-022-05599-w
- 24 Regan AO, Hayes P, Connor RO, *et al.* The University of Limerick Education and Research Network for General Practice ( ULEARN-GP ): practice characteristics and general practitioner perspectives. *BMC Fam Pract* 2020;**21**. doi:<https://doi.org/10.1186/s12875-020-1100-y>

- 1  
2  
3 25 Diamond IR, Grant RC, Feldman BM, *et al.* Defining consensus: a systematic review  
4 recommends methodologic criteria for reporting of Delphi studies. *J Clin Epidemiol*  
5 2014;**67**:401–9. doi:10.1016/j.jclinepi.2013.12.002  
6  
7  
8  
9 26 Juhl C, Christensen R, Roos EM, *et al.* Impact of Exercise Type and Dose on Pain  
10 and Disability in Knee Osteoarthritis A Systematic Review and Meta-Regression  
11 Analysis of Randomized Controlled Trials. *Arthritis Rheumatol* 2014;**66**:622–36.  
12 doi:10.1002/art.38290  
13  
14  
15 27 Susko AM, Fitzgerald GK. The pain-relieving qualities of exercise in knee  
16 osteoarthritis. *Open access Rheumatol Res Rev* 2013;**5**:81–91.  
17 doi:10.2147/OARRR.S53974  
18  
19  
20  
21 28 Skou ST, Roos EM, Laursen MB, *et al.* A Randomized, Controlled Trial of Total Knee  
22 Replacement. *N Engl J Med* 2015;**373**:1597–606. doi:10.1056/NEJMoa1505467  
23  
24  
25 29 Holden MA, Hattle M, Runhaar J, *et al.* Moderators of the effect of therapeutic  
26 exercise for knee and hip osteoarthritis : a systematic review and individual participant  
27 data meta-analysis. *Lancet Rheumatol* 2023;**5**:e386–400. doi:10.1016/S2665-  
28 9913(23)00122-4  
29  
30  
31  
32 30 Hurley M, Dickson K, Hallett R, *et al.* Exercise interventions and patient beliefs for  
33 people with hip, knee or hip and knee osteoarthritis: a mixed methods review  
34 (Review). *Coch* 2018;:CD010842.  
35 doi:10.1002/14651858.CD010842.pub2.www.cochranelibrary.com  
36  
37  
38  
39 31 Goh S-L, Persson MSM, Stocks J, *et al.* Relative Efficacy of Different Exercises for  
40 Pain, Function, Performance and Quality of Life in Knee and Hip Osteoarthritis:  
41 Systematic Review and Network Meta-Analysis. *Sports Med* 2019;**49**:743–61.  
42 doi:10.1007/s40279-019-01082-0  
43  
44  
45  
46 32 Seguin R, Nelson ME. The benefits of strength training for older adults. *Am J Prev*  
47 *Med* 2003;**25**:141–9. doi:10.1016/s0749-3797(03)00177-6  
48  
49  
50 33 Komatsu H, Yagasaki K, Saito Y, *et al.* Regular group exercise contributes to  
51 balanced health in older adults in Japan: a qualitative study. *BMC Geriatr*  
52 2017;**17**:190. doi:10.1186/s12877-017-0584-3  
53  
54  
55 34 Grønne DT, Roos EM, Ibsen R, *et al.* Cost-effectiveness of an 8- - week supervised  
56 education and exercise therapy programme for knee and hip osteoarthritis : a pre –  
57 post analysis of 16 255 patients participating in Good Life with osteoArthritis in  
58 Denmark (GLA:D). *BMJ Open* 2021;**11**. doi:10.1136/bmjopen-2021-049541  
59  
60

- 1  
2  
3 35 Mays AM, Kim S, Rosales K, *et al.* The Leveraging Exercise to Age in Place (LEAP)  
4 Study: Engaging Older Adults in Community-Based Exercise Classes to Impact  
5 Loneliness and Social Isolation. *Am J Geriatr psychiatry Off J Am Assoc Geriatr*  
6 *Psychiatry* 2021;**29**:777–88. doi:10.1016/j.jagp.2020.10.006  
7  
8  
9  
10 36 Gay C, Chabaud A, Guilley E, *et al.* Educating patients about the benefits of physical  
11 activity and exercise for their hip and knee osteoarthritis. Systematic literature review.  
12 *Ann Phys Rehabil Med* 2016;**59**:174–83.  
13 doi:<https://doi.org/10.1016/j.rehab.2016.02.005>  
14  
15  
16  
17 37 Goff AJ, Oliveira D De, Merolli M, *et al.* Patient education improves pain and function  
18 in people with knee osteoarthritis with better effects when combined with exercise  
19 therapy : a systematic review. *J Physiother* 2021;**67**:177–89.  
20 doi:10.1016/j.jphys.2021.06.011  
21  
22  
23  
24 38 Arthritis Ireland. Living Well with Arthritis (and Related Conditions) Self-Management  
25 Programme. Courses. 2023.[https://www.arthritisireland.ie/living-well-with-arthritis-and-](https://www.arthritisireland.ie/living-well-with-arthritis-and-related-conditions-self-management-programme)  
26 [related-conditions-self-management-programme](https://www.arthritisireland.ie/living-well-with-arthritis-and-related-conditions-self-management-programme) (accessed 22 Aug 2023).  
27  
28  
29  
30 39 Vos T, Lim SS, Abbafati C, *et al.* Global burden of 369 diseases and injuries in 204  
31 countries and territories, 1990-2019: a systematic analysis for the Global Burden of  
32 Disease Study 2019. *Lancet* 2020;**396**:1204–22. doi:10.1016/S0140-6736(20)30925-9  
33  
34  
35 40 Prasanna SS, Korner-bitensky N, Ahmed S. Why Do People Delay Accessing Health  
36 Care for Knee Osteoarthritis ? Exploring Beliefs of Health Professionals and Lay  
37 People. *Physiother Canada* 2013;**65**:56–64. doi:10.3138/ptc.2011-50  
38  
39  
40 41 Vennik J, Hughes S, Smith KA, *et al.* Patient and practitioner priorities and concerns  
41 about primary healthcare interactions for osteoarthritis: A meta-ethnography. *Patient*  
42 *Educ Couns* 2022;**105**:1865–77. doi:<https://doi.org/10.1016/j.pec.2022.01.009>  
43  
44  
45 42 Bell OJ, Flynn D, Clifford T, *et al.* Identifying behavioural barriers and facilitators to  
46 engaging men in a community-based lifestyle intervention to improve physical and  
47 mental health and well-being. *Int J Behav Nutr Phys Act* 2023;**20**:25.  
48 doi:10.1186/s12966-023-01425-1  
49  
50  
51  
52 43 Skou ST, Brødsgaard RH, Nyberg M, *et al.* Personalised exercise therapy and self-  
53 management support for people with multimorbidity: feasibility of the MOBILIZE  
54 intervention. *Pilot Feasibility Stud* 2023;**9**:12. doi:10.1186/s40814-023-01242-0  
55  
56  
57  
58 44 Swaithe L, Paskins Z, Finney A. Factors influencing the implementation of evidence-  
59 based guidelines for osteoarthritis in primary care : A systematic review and thematic  
60



1  
2  
3 synthesis. *Musculoskeletal Care* 2020;**18**:101–10. doi:10.1002/msc.1452  
4

5 45 Whiteley R, Napier C, van Dyk N, *et al*. Clinicians use courses and conversations to  
6 change practice, not journal articles: is it time for journals to peer-review courses to  
7 stay relevant? *Br J Sports Med* 2021;**55**:651 LP – 652. doi:10.1136/bjsports-2020-  
8 102736  
9  
10

11  
12 46 Lineker SC, Bell MJ, Boyle J, *et al*. Implementing arthritis clinical practice guidelines in  
13 primary care. *Med Teach* 2009;**31**:230–7. doi:10.1080/01421590802158377  
14  
15

16 47 Johansson M, Guyatt G, Montori V, *et al*. Guidelines should consider clinicians ' time  
17 needed to treat. *Br Med J* 2023;**380**. doi:10.1136/bmj-2022-072953  
18  
19  
20  
21  
22  
23  
24  
25  
26  
27  
28  
29  
30  
31  
32  
33  
34  
35  
36  
37  
38  
39  
40  
41  
42  
43  
44  
45  
46  
47  
48  
49  
50  
51  
52  
53  
54  
55  
56  
57  
58  
59  
60

1  
2  
3  
4  
5  
6  
7  
8  
9  
10  
11  
12  
13  
14  
15  
16  
17  
18  
19  
20  
21  
22  
23  
24  
25  
26  
27  
28  
29  
30  
31  
32  
33  
34  
35  
36  
37  
38  
39  
40  
41  
42  
43  
44  
45  
46  
47  
48  
49  
50  
51  
52  
53  
54  
55  
56  
57  
58  
59  
60

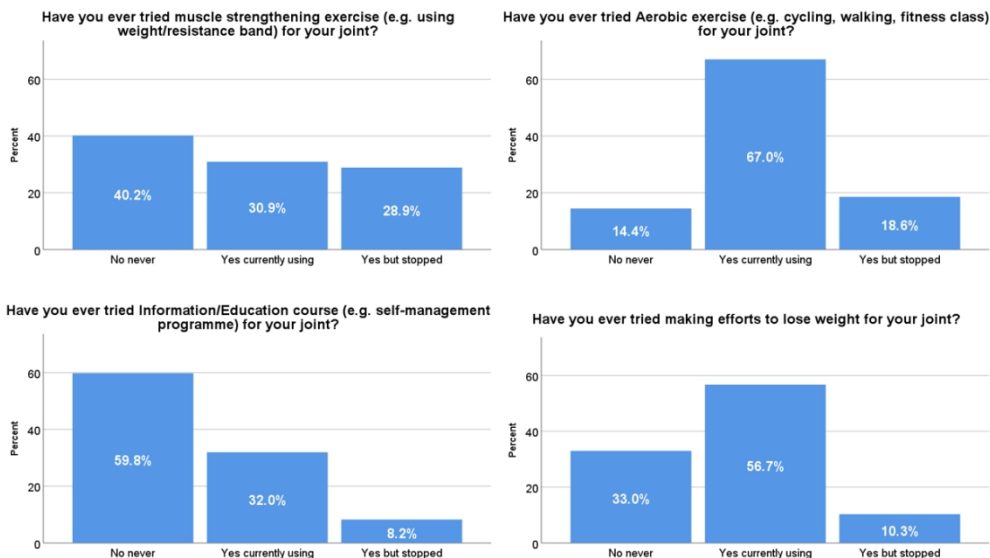

680x385mm (47 x 47 DPI)

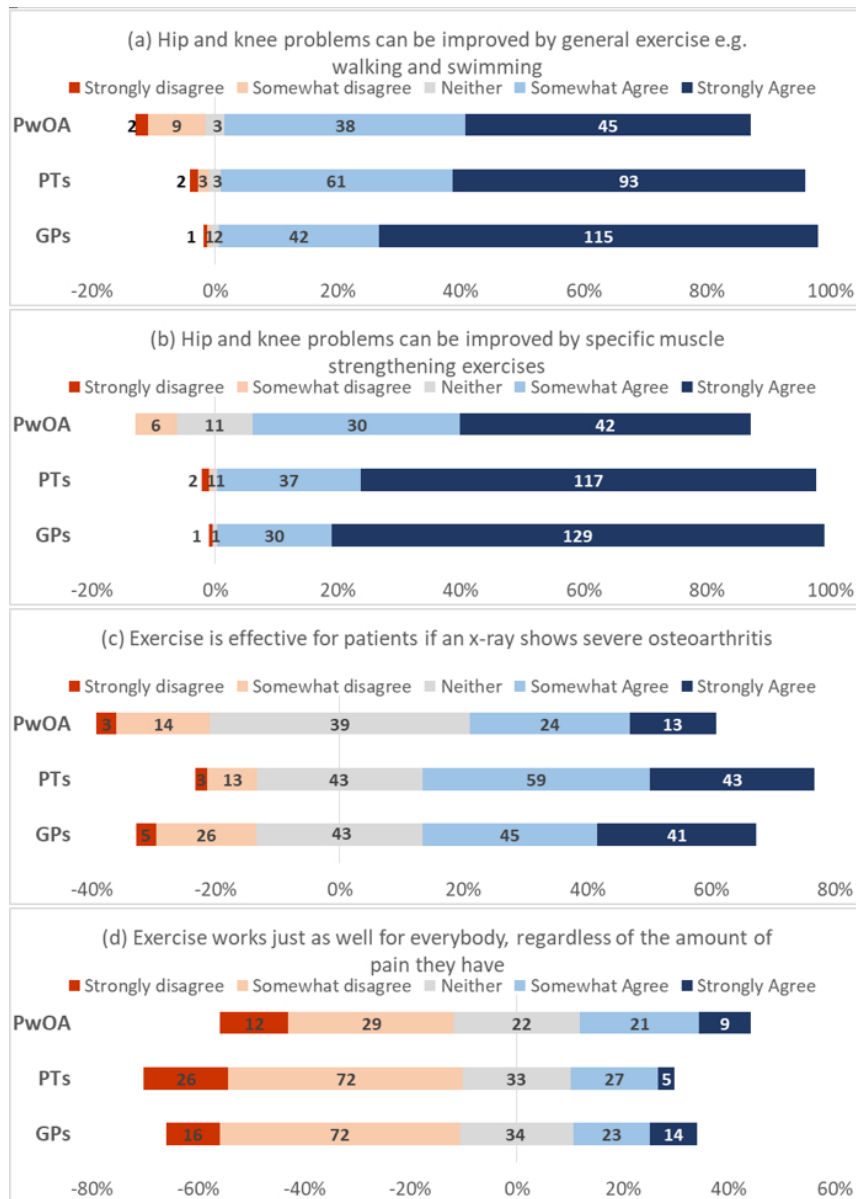

377x526mm (47 x 47 DPI)

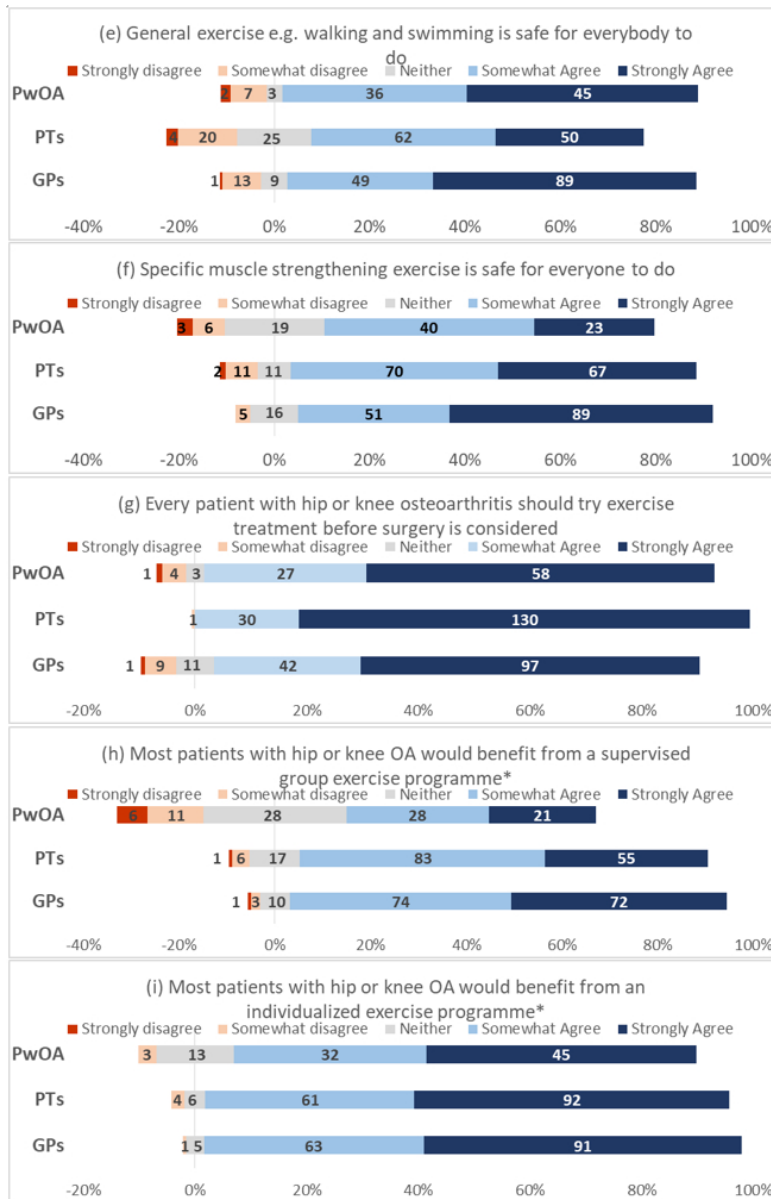

354x545mm (47 x 47 DPI)

**Supplemental File 1**

Guideline-based exercise management for hip and knee osteoarthritis: differences in healthcare professional and patient beliefs

## **Survey 1: Beliefs, Barriers and Enablers to Exercise Prescription for Hip and Knee Osteoarthritis in General Practice in Ireland**

Instructions for completing this questionnaire

- When completing the questionnaire, please try and provide answers that most accurately reflect your usual clinical practice. There are no 'correct' or 'incorrect' answers.
- Please do not consult any literature while completing this questionnaire.

### **Section 1. Information about you**

- How long have you been qualified as a General Practitioner?
  - Less than 5 years experience
  - 5-10 years experience
  - Greater than 10 years experience
- How many GP's work in your practice (including yourself)
- Are you:  Female  Male  Other  Prefer not to disclose
- Is your primary practice:  urban  rural  mixed
- Is your practice:
  - Primary care reimbursement scheme only
  - Private practice only
  - Mixed
- Since graduating from University, do you remember receiving any specific postgraduate training in musculoskeletal (MSK) which contained education about hip or knee osteoarthritis or chronic pain? (By this we do not mean clinical placements or jobs in rheumatology or orthopaedics)
  - Yes  No
  - If yes, what type of training?
    - CME small groups (or guest speaker)
    - Diploma in MSK
    - M.Sc. in Sports & Exercise Medicine
    - Sports Medicine Faculty conferences
    - Private Hospital Day Course
    - Therapeutic Intra Articular and Soft Tissue Injection and Assessment Course
    - Specific Modules on MSK on your GP training Scheme
    - Other \_\_\_\_\_
- How would you rate your confidence in treating hip and knee osteoarthritis?
  - Not confident
  - Slightly confident
  - Confident
  - Very confident
  - Extremely confident
- Do you have, or have you ever suffered from chronic knee or hip pain yourself?
  - Yes  No
- What percentage of your typical caseload is made up of patients with hip and/or knee pain?
  - 1-5%  6-25%  26-50%  51-75%  >75%

### **Section 2. Exercise beliefs for hip and knee osteoarthritis**

2.1 Where do you get your knowledge of care advancements for persons with knee or hip osteoarthritis? (Tick all that apply)

- Published guidelines or recommendations (e.g. NICE, EULAR, OARSI)
- Reading medical journals
- Twitter or other social media
- Podcasts
- CME networks or other GP networks
- Conference attendance
- Course attendance

**Supplemental File 1**

Guideline-based exercise management for hip and knee osteoarthritis: differences in healthcare professional and patient beliefs

Other \_\_\_\_\_

**We are interested in your views about the role of exercise in the treatment of hip and knee osteoarthritis. Please indicate the extent to which you agree or disagree with the statements given by ticking or placing an 'X' in one box per row.**

| Question                                                                                                                         | Strongly Disagree | Disagree | Neutral | Agree | Strongly Agree |
|----------------------------------------------------------------------------------------------------------------------------------|-------------------|----------|---------|-------|----------------|
| 2.2 Hip and knee problems are improved by general exercise e.g. walking and swimming                                             |                   |          |         |       |                |
| 2.3 Hip and knee problems are improved by specific muscle strengthening exercises                                                |                   |          |         |       |                |
| 2.4 General exercise e.g. walking and swimming is safe for everybody to do                                                       |                   |          |         |       |                |
| 2.5 Specific muscle strengthening exercise is safe for everyone to do                                                            |                   |          |         |       |                |
| 2.6 Every patient with hip or knee OA should try conservative exercise treatment before more invasive procedures are recommended |                   |          |         |       |                |
| 2.7 Exercise for hip or knee OA is most beneficial when it is tailored to meet individual patient needs                          |                   |          |         |       |                |
| 2.8 A standard set of exercises is sufficient for every patient with hip or knee OA                                              |                   |          |         |       |                |
| 2.9 Education on lifestyle change is important for patients with OA                                                              |                   |          |         |       |                |
| 2.10 Education on strategies for self-management of pain are important for patients with OA                                      |                   |          |         |       |                |
| 2.11 It is important that people with OA increase their overall activity levels                                                  |                   |          |         |       |                |
| 2.12 Exercise is effective for patients if an x-ray shows severe knee osteoarthritis                                             |                   |          |         |       |                |
| 2.13 Exercise for OA is more effectively provided by physiotherapists than GPs                                                   |                   |          |         |       |                |
| 2.14 Time constraints prevent the provision of advice on individual exercises for OA                                             |                   |          |         |       |                |
| 2.15 Exercise for OA should preferably be used after drug treatment has been tried                                               |                   |          |         |       |                |
| 2.16 Exercise for chronic knee pain would be used more frequently if access to physiotherapy was easier                          |                   |          |         |       |                |

**Section 3. Clinical scenario of a patient with osteoarthritis**

Presented below is a clinical scenario of a patient with suspected knee osteoarthritis who presents to you with this problem for the first time. All questions in this section relate to the care you would give this particular

**Patient:** Mrs. Murphy, 60-year old shop owner, no health insurance  
**Complaint:** Right sided knee pain  
**History:** Gradually worsening over 3 years  
 No history of trauma  
 Pain when walking and at rest, worst when climbing stairs.  
 No night pain.  
 Activities of daily living are manageable. Difficulty gardening.  
 Finding work increasingly difficult due to the stairs  
 Tried going to gym but stopped – thinks was making pain worse.  
 Otherwise well – mild hypertension  
 Has tried ibuprofen with no effect  
**Medication:** Amlodipine  
**Examination:** Mild Obesity with Body Mass Index of 33  
 Knees – bilaterally no effusions.  
 Joint line tenderness on palpation.  
 No pain or reduced mobility around knee cap  
 Slightly reduced flexion of the right knee.  
 Hips – no abnormality detected

patient.

**Supplemental File 1**

Guideline-based exercise management for hip and knee osteoarthritis: differences in healthcare professional and patient beliefs

3.1 Select some **key words** you would use to describe their diagnosis **to the patient**. (Select all that apply)

- |                                        |                                             |                                           |
|----------------------------------------|---------------------------------------------|-------------------------------------------|
| <input type="checkbox"/> Mild          | <input type="checkbox"/> Cartilage thinning | <input type="checkbox"/> Fear avoidance   |
| <input type="checkbox"/> Moderate      | <input type="checkbox"/> Overloading        | <input type="checkbox"/> Pain sensitivity |
| <input type="checkbox"/> Severe        | <input type="checkbox"/> Overweight         | <input type="checkbox"/> Bone on bone     |
| <input type="checkbox"/> Degeneration  | <input type="checkbox"/> Deterioration      | <input type="checkbox"/> Weakness         |
| <input type="checkbox"/> Wear and tear | <input type="checkbox"/> Normal ageing      | <input type="checkbox"/> Joint swelling   |
| <input type="checkbox"/> Arthritis     | <input type="checkbox"/> Joint damage       | Other _____                               |

3.2 What investigation(s)/assessment(s), if any, would you do/order for this patient at this point

- None    Knee x-ray    Blood tests    Other \_\_\_\_\_

3.3 At this consultation, what approaches would you use, or suggest, to manage this patient? (please tick all that apply)

- |                                                    |                                                   |                                                  |
|----------------------------------------------------|---------------------------------------------------|--------------------------------------------------|
| <input type="checkbox"/> None                      | <input type="checkbox"/> Advice on footwear       | <input type="checkbox"/> Exercise                |
| <input type="checkbox"/> Ice                       | <input type="checkbox"/> General activity         | <input type="checkbox"/> Injection of steroids   |
| <input type="checkbox"/> Heat                      | <input type="checkbox"/> Provision of walking aid | <input type="checkbox"/> Oral NSAID              |
| <input type="checkbox"/> Rest                      | <input type="checkbox"/> Weight Loss              | <input type="checkbox"/> Topical NSAID           |
| <input type="checkbox"/> Weak opioids              | <input type="checkbox"/> Paracetamol              | <input type="checkbox"/> Glucosamine/Chondroitin |
| <input type="checkbox"/> Other, please state _____ |                                                   |                                                  |

3.4 If you selected exercise above, what form would this take? (Select all that apply)

- Suggest general exercise and activity  
 Suggest specific exercises  
 Give a leaflet or online resource  
 Refer to physiotherapy or other exercise specialist  
 Other (please state) \_\_\_\_\_

3.5 In an ideal world without barriers, would you refer the patient to physiotherapy or orthopaedic consultant or neither, at this stage?

- Physiotherapy  
 Orthopaedic consultant  
 Neither

3.6 In your current practice, would you refer this patient to physiotherapy at this stage?

- Yes  
 No

If yes, why? (Select all that apply)

- Deemed an appropriate candidate for supervised conservative treatment  
 Ease of access to physiotherapy  
 Lack of time to appropriately address exercise needs in practice  
 Lack of response to NSAIDS  
 Other \_\_\_\_\_

If no, why not? (Select all that apply)

- Not an appropriate candidate for conservative treatment  
 Long waiting lists and poor access to physiotherapy  
 Other interventions are a priority  
 Exercise will make the pain worse  
 Patient has tried exercise  
 I would prefer to examine further therapeutic options first (e.g., develop a pain management plan or give an intra articular steroid injection)  
 Other \_\_\_\_\_

3.7 In your current practice, would you refer this patient to an orthopaedic consultant at this stage?

- Yes  
 No

If yes, why? (Select all that apply)

- Deemed an appropriate candidate for surgery right now

**Supplemental File 1**

Guideline-based exercise management for hip and knee osteoarthritis: differences in healthcare professional and patient beliefs

- Will likely need a joint replacement in a few years so put on waiting list now  
 Need a specialist opinion  
 Other \_\_\_\_\_

If no, why not? (Select all that apply)

- More conservative treatments have not been exhausted  
 Symptoms not severe enough to warrant joint replacement  
 Waiting list too long  
 Other \_\_\_\_\_

3.8 Would you refer the patient to see someone else, either in the primary or community team or into secondary care, at this point?

- Yes  
 No

If yes, who? \_\_\_\_\_

**Section 4. Barriers and enablers to exercise prescription and referral in general practice**

In your practice and experience of treating patients with osteoarthritis, what are the main barriers to exercise prescription or referral? (Please select all that apply)

- Insufficient time in consultation  
 Insufficient expertise  
 Uncertainty about the effects of exercise  
 Uncertainty about the most appropriate exercise type  
 Uncertainty about the safety of exercise  
 Cost and accessibility of physiotherapy for patient  
 Physiotherapy waiting lists are too long  
 Lack of a standardized physiotherapy programme for OA in the region  
 Patients prefer other management options  
 Patients want an orthopaedic consultant referral  
 English language barrier for patients  
 Severity of disease (symptoms too mild)  
 Severity of disease (symptoms too severe)  
 Older age of patient  
 Presence of many comorbidities  
 Other \_\_\_\_\_

What enablers would help you to prescribe or refer a patient with osteoarthritis to exercise in your practice?

- Increased formal post-qualification education e.g. diploma or masters  
 Increased post-qualification training e.g. workshops, videos  
 Increased exercise education during GP training  
 More consultation time to provide exercise prescription  
 Shorter waiting lists and improved access to physiotherapy  
 Presence of an evidence-based physiotherapy-supervised group exercise programme for osteoarthritis in the locality  
 Patients who recognize the importance of strategies for self-management of pain using appropriate exercise recommendations  
 Low cost community-based exercise programmes  
 Renumeration for exercise prescription and follow up consultations  
 Other \_\_\_\_\_

**Thank you for taking the time to complete this questionnaire. Your time and participation is greatly appreciated.**



## Supplemental File 1

Guideline-based exercise management for hip and knee osteoarthritis: differences in healthcare professional and patient beliefs

### Survey 2: Beliefs, Barriers and Enablers to Group Exercise Programme Delivery for Hip and Knee Osteoarthritis in Physiotherapy Practice in Ireland

The questionnaire is divided into 3 sections and should take approximately **7 minutes** to complete.

Instructions for completing this questionnaire

- When completing the questionnaire, please try and provide answers that most accurately reflect your usual clinical practice. There are no 'correct' or 'incorrect' answers.
- Please do not consult any literature while completing this questionnaire.

#### Section 1. Information about you

- How long have you been qualified as a Physiotherapist?
  - Less than 5 years experience
  - 5-10 years experience
  - Greater than 10 years experience
- How many Physiotherapists work in your clinic (including yourself) \_\_\_\_\_
- Are you:  Female  Male  Other  Prefer not to disclose
- Is your primary work setting:
  - Public hospital
  - Private hospital
  - Primary, community and continuing care
  - Private practice clinic
  - Education
  - Other (please state) \_\_\_\_\_
- Have you undertaken any specific post-qualification training, which involved education about hip or knee osteoarthritis or chronic pain? (By this we do not mean clinical placements or jobs in rheumatology or orthopaedics)  Yes  No
 

If yes, what type of training? (Provide additional details if you wish to expand)

  - In-service training Additional details \_\_\_\_\_
  - M.Sc. (taught) in this/similar field Additional details \_\_\_\_\_
  - M.Sc. (research) in this/similar field Additional details \_\_\_\_\_
  - PhD in this/similar field Additional details \_\_\_\_\_
  - Day, weekend or online course (please name most relevant) \_\_\_\_\_
  - Other \_\_\_\_\_
- How would you rate your confidence in treating hip and knee osteoarthritis?
  - Not confident
  - Slightly confident
  - Confident
  - Very confident
  - Extremely confident
- Do you have, or have you ever suffered from chronic knee or hip pain yourself?  Yes  No
- What percentage of your typical caseload is made up of patients with hip and/or knee osteoarthritis?
  - 1-5%  6-25%  26-50%  51-75%  >75%

#### Section 2. Exercise beliefs for hip and knee osteoarthritis

2.1 Where do you access your knowledge of management for persons with knee or hip osteoarthritis? (Tick all that apply)

- Published guidelines or recommendations (e.g. NICE, EULAR, OARSI)
- Clinic protocols, discussion with peers or in-services
- Reading published research articles
- Twitter or other social media
- Podcasts
- Blogs
- Infographics
- Videos
- ISCP specialist groups and other network events
- Conference attendance
- Course attendance

**Supplemental File 1**

Guideline-based exercise management for hip and knee osteoarthritis: differences in healthcare professional and patient beliefs

Other \_\_\_\_\_

Please now rank in order your preferred resources to learn from

**We are interested in your views about the role of exercise in the treatment of hip and knee osteoarthritis. Please indicate the extent to which you agree or disagree with the statements given by ticking one box per row.**

| Question                                                                                                           | Strongly Disagree | Disagree | Neutral | Agree | Strongly Agree |
|--------------------------------------------------------------------------------------------------------------------|-------------------|----------|---------|-------|----------------|
| 2.2 Hip and knee problems are improved by general exercise e.g. walking and swimming                               |                   |          |         |       |                |
| 2.3 Hip and knee problems are improved by specific muscle strengthening exercises                                  |                   |          |         |       |                |
| 2.4 Hip and knee problems are improved by focusing on motor or neuromuscular control of the joints during exercise |                   |          |         |       |                |
| 2.5 General exercise e.g. walking and swimming is safe for most patients to do                                     |                   |          |         |       |                |
| 2.6 Specific muscle strengthening exercise is safe for most patients to do                                         |                   |          |         |       |                |
| 2.7 Neuromuscular control exercises are safe for most patients to do                                               |                   |          |         |       |                |
| 2.8 Every patient with hip or knee OA should try conservative exercise treatment before surgery is considered      |                   |          |         |       |                |
| 2.9 Exercise for hip or knee OA is most beneficial when it is tailored to meet individual patient needs            |                   |          |         |       |                |
| 2.10 A standard set of exercises with individual progression is sufficient for every patient with hip or knee OA   |                   |          |         |       |                |
| 2.11 Education on lifestyle change is important for patients with OA                                               |                   |          |         |       |                |
| 2.12 Education on strategies for self-management of pain are important for patients with OA                        |                   |          |         |       |                |
| 2.13 It is important that people with OA increase their overall activity levels                                    |                   |          |         |       |                |
| 2.14 Exercise is effective for patients if an x-ray shows severe knee osteoarthritis                               |                   |          |         |       |                |
| 2.15 Most patients with hip or knee OA would benefit from a supervised group exercise programme                    |                   |          |         |       |                |
| 2.16 Most patients with hip or knee OA would benefit from an individualized exercise programme                     |                   |          |         |       |                |

**Section 3. Barriers and enablers to exercise programme delivery in physiotherapy practice**

3.1 Please select the current level of government COVID19 restrictions in place as you are completing this survey

Level 1     Level 2     Level 3     Level 4     Level 5

3.2 **Pre-COVID19** restrictions in March 2020, were you or your clinic providing **group exercise classes** for patients with hip or knee osteoarthritis?  Yes  No

If Yes, what was the average number of classes per week? \_\_\_\_\_

If No, were you interested in offering group exercise classes for osteoarthritis in an ideal world and **if no barriers** existed?

Yes

No

**Supplemental File 1**

Guideline-based exercise management for hip and knee osteoarthritis: differences in healthcare professional and patient beliefs

3.3 **Pre-COVID19** restrictions in March 2020, **what** were the main **barriers** to providing group exercise programmes for patients with osteoarthritis in your practice? (Please select all that apply)

- None
- Insufficient space and equipment resources
- Insufficient personnel (staff) resources
- Insufficient referrals or low OA caseload
- Patients want individualized programmes
- Patients prefer other management options e.g. manual therapy
- Insufficient expertise
- Uncertainty about the effects of exercise
- Uncertainty about the most appropriate exercise type
- Uncertainty about the safety of exercise
- Cost for patient
- Access for patient (e.g. travel, parking, time)
- Scheduling conflict related to patient working hours and clinic hours
- Lack of a standardised programme or protocol for exercise for OA
- English language barrier for patients
- Lack of support from colleagues or managers
- Other \_\_\_\_\_

3.4 Are you currently offering **group exercise classes** for patients with hip or knee osteoarthritis and **to what capacity**?

- Yes, face to face at full capacity
- Yes, face to face at reduced capacity compared to Pre-COVID19 restrictions
- Yes, online classes only
- Yes, combination of face-to-face and online
- No

3.5 **Under current restrictions**, are there any **additional barriers** to providing **face-to-face** group exercise programmes for patients with osteoarthritis in your practice? (Please select all that apply)

- None
- Government restrictions currently do not allow for group classes
- Hospital or clinic protocols currently do not allow for group classes
- Patients do not want to attend clinic
- Not enough resources for adequate distancing for class members
- Sanitization procedures are too time consuming
- Own COVID-related safety concerns
- Other \_\_\_\_\_

3.6 **Under current restrictions**, are there any **additional barriers** to providing **online** group exercise programmes for patients with osteoarthritis in your practice? (Please select all that apply)

- None
- Lack of IT resources in clinic (e.g. online platform, webcams, high speed Wi-Fi)
- Lack of personnel (staff) with IT knowledge
- Patients lack IT resources or knowledge
- Patients prefer to wait until they can access face-to-face treatment
- Uncertainty about the effectiveness of online group exercise
- Own personal preference
- Other \_\_\_\_\_

3.7 What **enablers** would help you to provide **face to face group exercise** classes to patients with osteoarthritis in your practice if COVID restrictions were not a factor? (Please select all that apply)

- None
- More university post-qualification education e.g. diploma or masters
- More other post-qualification training e.g. short courses, workshops, videos
- More education on group exercise delivery during physiotherapy training
- Appropriate referrals from GP or other sources
- GPs who impart knowledge regarding benefits of exercise to patients upon referral

**Supplemental File 1**

Guideline-based exercise management for hip and knee osteoarthritis: differences in healthcare professional and patient beliefs

- Resources to deliver quality educational material regarding self-management alongside exercise
- More support from colleagues or managers
- Other \_\_\_\_\_

3.8 What **enablers** would help you to provide an option of **online** group exercise classes to patients with osteoarthritis in your practice? (Please select all that apply)

- None
- Improved IT infrastructure in clinic (e.g. laptops, webcams)
- IT skills resources for delivering online programmes (e.g. tutorials, do's and don'ts)
- Access to IT resources (e.g. tutorials) to provide patients with
- Improved Wi-Fi and bandwidth nationwide
- Strong evidence for effectiveness of existing online programmes
- An online registry allowing collection of patient outcomes pre- and post- programme
- Other \_\_\_\_\_

3.9 Would you be interested in receiving **training** (1.5 day workshop) to effectively implement and deliver a standardized, international, evidence-based group exercise and education programme with online and face-to-face options for patients with osteoarthritis in your clinic?

- Extremely interested
- Very interested
- Moderately interested
- Slightly interested
- Not at all interested

If not interested, why? \_\_\_\_\_

3.10 If interested, how much would you be willing to pay for this continuous professional development training?

- €100-150
- €151-200
- €201-250
- €251-300
- €301-350
- More than €350
- N/A

**Thank you for taking the time to complete this questionnaire. Your time and participation is greatly appreciated.**

**Supplemental File 1**

Guideline-based exercise management for hip and knee osteoarthritis: differences in healthcare professional and patient beliefs

**Survey 3: Survey on the Role of Exercise for Hip and Knee Osteoarthritis in Adults in Ireland**

The questions below are divided into 3 sections. Please complete the questions to the best of your ability.

**Section 1. Information about you**

1. Are you:  Female  Male  Other  Prefer not to disclose
2. Which age category do you fall into?
  - 30 to 39 years
  - 40 to 49 years
  - 50 to 59 years
  - 60 to 69 years
  - 70 to 79 years
  - 80 to 89 years
  - 90 years or older
3. Which province in Ireland do you reside in?  Munster  Ulster  Connacht  Leinster  
**\*\*If "Ulster" is selected, question 3(b) will appear.**
  - 3(b) Do you access your healthcare in:
    - Northern Ireland (NHS)
    - Republic of Ireland (HSE)
    - A combination of both
4. Which of the following best describes where you live?
  - Inner city
  - Suburb of a city
  - Town
  - Village
  - Open country
  - Island off Ireland
5. Have you ever been told by a health professional that you have a diagnosis of the following?(Select all that apply)
 

|                                                                   |                                                                     |
|-------------------------------------------------------------------|---------------------------------------------------------------------|
| <input type="checkbox"/> Arthritis                                | <input type="checkbox"/> Diabetes Mellitus (type 1 or 2)            |
| <input type="checkbox"/> Osteoarthritis                           | <input type="checkbox"/> Kidney or liver disease                    |
| <input type="checkbox"/> Wear and tear                            | <input type="checkbox"/> Anemia (reduced number of red blood cells) |
| <input type="checkbox"/> Degenerative changes                     | <input type="checkbox"/> Other blood disease                        |
| <input type="checkbox"/> Rheumatoid arthritis                     | <input type="checkbox"/> Cancer                                     |
| <input type="checkbox"/> Hypertension                             | <input type="checkbox"/> Depression                                 |
| <input type="checkbox"/> Heart Disease                            | <input type="checkbox"/> Anxiety                                    |
| <input type="checkbox"/> Ulcer or other bowel diseases            | <input type="checkbox"/> Other mental health disorder               |
| <input type="checkbox"/> Neurological disease e.g. Parkinson's/MS |                                                                     |
| <input type="checkbox"/> Respiratory diseases e.g. COPD           | <input type="checkbox"/> Thyroid Disease                            |
| <input type="checkbox"/> Hemochromatosis                          | <input type="checkbox"/> Fibromyalgia                               |
| <input type="checkbox"/> Other health condition _____             |                                                                     |
6. Have you had pain and joint symptoms in any of the following joints for **6 months or more** (select all that apply)
 

|                                             |                                                       |
|---------------------------------------------|-------------------------------------------------------|
| <input type="checkbox"/> Right Knee         | <input type="checkbox"/> Left Knee                    |
| <input type="checkbox"/> Right Hip          | <input type="checkbox"/> Left Hip                     |
| <input type="checkbox"/> Right Ankle        | <input type="checkbox"/> Left Ankle                   |
| <input type="checkbox"/> Right Shoulder     | <input type="checkbox"/> Left Shoulder                |
| <input type="checkbox"/> Right Elbow        | <input type="checkbox"/> Left Elbow                   |
| <input type="checkbox"/> Right Wrist        | <input type="checkbox"/> Left Wrist                   |
| <input type="checkbox"/> Right Hand/Fingers | <input type="checkbox"/> Left Hand/Fingers            |
| <input type="checkbox"/> Lower Back         | <input type="checkbox"/> Other, please describe _____ |
| <input type="checkbox"/> Mid Back           |                                                       |
| <input type="checkbox"/> Neck               |                                                       |
7. Have you ever had joint replacement surgery for any of your painful joints? Please select below the joints that have been replaced.
 

|                                         |                                        |
|-----------------------------------------|----------------------------------------|
| <input type="checkbox"/> Right Knee     | <input type="checkbox"/> Left Knee     |
| <input type="checkbox"/> Right Hip      | <input type="checkbox"/> Left Hip      |
| <input type="checkbox"/> Right Ankle    | <input type="checkbox"/> Left Ankle    |
| <input type="checkbox"/> Right Shoulder | <input type="checkbox"/> Left Shoulder |

**Supplemental File 1**

Guideline-based exercise management for hip and knee osteoarthritis: differences in healthcare professional and patient beliefs

- Right Elbow                       Left Elbow  
 Right Wrist                       Left Wrist  
 Right Hand/Fingers               Left Hand/Fingers  
 Other, please describe \_\_\_\_\_

8. Of your hip and/or knee joints that have **NOT** been replaced, which joint are you most bothered by? (select one)
- Right Knee                       Left Knee  
 Right Hip                       Left Hip

**All remaining questions will now be related to the joint that you have chosen.**

9. How long have you been experiencing pain in your [insert chosen joint]?
- 6 months – 1 year  
 1 – 2 years  
 2 – 3 years  
 3 – 4 years  
 4 – 5 years  
 More than 5 years
10. Have you seen or spoken to your GP about your painful [insert chosen joint]?  Yes  No
11. Have you ever had an x-ray of your [insert chosen joint]?  Yes  No
12. Has your GP ever referred you to an **orthopaedic consultant** for your [insert chosen joint]?
- Yes  
 No  
 Currently on a waiting list (private consultant referral)  
 Currently on a waiting list (public consultant referral)
- \*\* If on a waiting list, how long have you been waiting?
- Less than 6 months  
 6 months – 1 year  
 1 year – 1.5 years  
 1.5 years – 2 years  
 More than 2 years
13. Has your GP ever referred you to a **physiotherapist** for your [insert chosen joint]?
- Yes  
 No  
 Currently on a waiting list (private consultant referral)  
 Currently on a waiting list (public consultant referral)
- \* If on a waiting list, how long have you been waiting?
- Less than 6 months  
 6 months – 1 year  
 1 year – 1.5 years  
 1.5 years – 2 years  
 More than 2 years
14. How would you rate the pain and symptoms you are experiencing in your hip and/or knee on an average day?
- No pain or symptoms  
 Mild pain and symptoms  
 Moderate pain and symptoms  
 Severe pain and symptoms
15. Have you EVER tried any of the following specifically for your [insert chosen joint]?
- |                                                                      |                                    |                                               |                                             |
|----------------------------------------------------------------------|------------------------------------|-----------------------------------------------|---------------------------------------------|
| Muscle strengthening exercise<br>(e.g. using weight/resistance band) | <input type="checkbox"/> No, never | <input type="checkbox"/> Yes, currently using | <input type="checkbox"/> Yes, stopped using |
| Aerobic exercise<br>(e.g. cycling, walking, fitness class)           | <input type="checkbox"/> No, never | <input type="checkbox"/> Yes, currently using | <input type="checkbox"/> Yes, stopped using |
| Information/Education course<br>(e.g. self-management programme)     | <input type="checkbox"/> No, never | <input type="checkbox"/> Yes, currently using | <input type="checkbox"/> Yes, stopped using |
| Making efforts to lose weight                                        | <input type="checkbox"/> No, never | <input type="checkbox"/> Yes, currently using | <input type="checkbox"/> Yes, stopped using |

**Supplemental File 1**

Guideline-based exercise management for hip and knee osteoarthritis: differences in healthcare professional and patient beliefs

**Section 2. Exercise beliefs for hip and knee osteoarthritis**

We are interested in your views about the role of exercise in the treatment of hip and knee osteoarthritis.

Please indicate how much you agree or disagree with the statements given by selecting one option per question.

| Question                                                                                                                                | Strongly Disagree | Disagree | Neutral | Agree | Strongly Agree |
|-----------------------------------------------------------------------------------------------------------------------------------------|-------------------|----------|---------|-------|----------------|
| 2.1 Hip and knee problems can be improved by general exercise e.g. walking and swimming                                                 |                   |          |         |       |                |
| 2.2 Hip and knee problems can be improved by specific muscle strengthening exercises                                                    |                   |          |         |       |                |
| 2.3 General exercise e.g. walking and swimming is safe for everybody to do                                                              |                   |          |         |       |                |
| 2.4 Specific muscle strengthening exercise is safe for everyone to do                                                                   |                   |          |         |       |                |
| 2.5 Every patient with hip or knee osteoarthritis should try exercise treatment before surgery is considered                            |                   |          |         |       |                |
| 2.6 Patients should learn more about how to self-manage their pain and symptoms using exercise and physical activity                    |                   |          |         |       |                |
| 2.7 The best way to learn about exercise is in a supervised group setting with people who have similar pain (Pre-COVID-19 restrictions) |                   |          |         |       |                |
| 2.8 The best way to learn about exercise is in a one-on-one setting with a health professional (Pre-COVID-19 restrictions)              |                   |          |         |       |                |
| 2.9 Exercise is effective for patients if an x-ray shows severe knee osteoarthritis                                                     |                   |          |         |       |                |
| 2.10 Exercise works just as well for everybody, regardless of the amount of pain they have                                              |                   |          |         |       |                |

**Section 3. Barriers and enablers to exercise for hip and knee osteoarthritis**

In this section we want to know more about your exercise experience and what kinds of things would prevent you or help you do more exercise

3.1 How many times a week do you exercise (e.g. 30 minute walk)?

- 3 or more days per week  
 Less than 3 days per week  
 I don't exercise

3.2 Has a health professional ever given you specific exercises for your [insert chosen joint]?

- Yes  
 No  
 Not sure  
 \*If Yes, what type of health professional? (select all that apply)  
 Physiotherapist  
 GP  
 Orthopaedic surgeon  
 Nurse  
 Personal trainer  
 Other, please name \_\_\_\_\_

\*If Yes, what type of exercise?

- Home-based individual exercises  
 Group exercise class for osteoarthritis  
 Other, please state \_\_\_\_\_

\*If Yes, did you find the exercise beneficial?

- Yes  
 No  
 Not sure

3.3 Please select the current level of government COVID19 restrictions in place as you are completing this survey

**Supplemental File 1**

Guideline-based exercise management for hip and knee osteoarthritis: differences in healthcare professional and patient beliefs

Level 1       Level 2       Level 3       Level 4       Level 5 (strictest restrictions)

3.4 Thinking about life **without COVID19** restrictions, **what** are the main **barriers** that would prevent you from exercising? (Please select all that apply)

- Pain or other joint symptoms
- I need assistance for mobility e.g. walking stick, wheelchair
- Finding time to exercise
- Lack of enjoyment from exercise
- Lack of exercise buddy or support network
- Wet or cold weather
- Other health problems
- Other disability e.g. visual impairment
- Cost of a gym membership or physiotherapy visit
- Cost of active wear or equipment
- I don't know the best types of exercise to do
- I don't know who to contact to learn more or do more exercise
- Uncertainty about the safety of exercise for joint pain
- Uncertainty about the benefit of exercise for joint pain
- Negative body image
- Access to facilities (e.g. availability, travel, parking)
- Work commitments
- Family commitments or other responsibilities
- Age
- Fear of injury
- Tiredness and fatigue
- Depression
- Other \_\_\_\_\_

3.5 Thinking about life **without COVID19** restrictions, what types of things would **help you to exercise more?** (Please select all that apply)

- Better knowledge of the best type of exercise to do
- Access to exercise that is supervised by a health professional
- Social aspect e.g. group exercise with other people with hip or knee pain
- More confidence in your joint
- Exercise recommendations from a GP
- Exercise recommendations from a physiotherapist
- More support from family or friends
- Warm and dry weather for outdoor exercise
- Low cost community exercise programmes
- Safe exercise environment (e.g. well-lit pathways)
- Other \_\_\_\_\_

3.6 Thinking about life **without COVID-19**, how interested would you be in attending a 6-week, twice per week, physiotherapy-supervised group exercise and education class for your hip or knee pain **at a clinic or community centre?**

- Extremely interested
- Very interested
- Moderately interested
- Slightly interested
- Not at all interested

If not interested, why? \_\_\_\_\_

3.7 Thinking about **current restrictions**, how interested would you be in taking part in a 6-week, twice per week, **ONLINE** physiotherapy-supervised group exercise and education class for you hip or knee pain?

- Extremely interested
- Very interested
- Moderately interested
- Slightly interested



**Supplemental File 1**

Guideline-based exercise management for hip and knee osteoarthritis: differences in healthcare professional and patient beliefs

Not at all interested

If not interested, why? \_\_\_\_\_

3.8 Do you have any experience with online-delivered healthcare or telerehabilitation from a GP or other health professional?

Yes

No

3.9 What are the **barriers** that would prevent you taking part in an **online exercise** class? (Please select all that apply)

Lack of technology equipment (e.g. laptop, smartphone or tablet, webcams)

Lack of confidence in using computers, laptops etc.

Wi-Fi / Broadband connection is not good enough

Preference to wait until I can access face-to-face treatment

Uncertain about how online group exercise would work

Lack of space in home environment to perform exercises

English language barriers

Lack of time to take part

Other \_\_\_\_\_

3.10 What would **help you** to take part in an **online** group exercise class with other people with osteoarthritis? (Please select all that apply)

An initial one-to-one session with a physiotherapist to get familiar with the process

Resources (e.g. videos) with explanations of how to get started

Improved Wi-Fi and bandwidth

Examples and testimonials from patients who have finished the classes

Opportunities to chat online with other patients before and after the class

Support from family members to get set up in your home

A laptop or tablet

Other \_\_\_\_\_

3.11 If interested, how much would you be willing to pay to take part in these exercise classes (price in euros for entire 14-15 session programme)?

€0-25

€26-50

€51-100

€101-150

€151-200

> €200

**Thank you for taking the time to complete this questionnaire. Your time and participation is greatly appreciated.**

**Supplemental File 2**

Guideline-based exercise management for hip and knee osteoarthritis: differences in healthcare professional and patient beliefs

**Supplemental Table:** Multivariable linear regression models to determine if positive beliefs about exercise in PwOA are associated with (1) referral to physiotherapist by a GP and (2) if they have seen a physiotherapist for their joint pain.

| <b>Dependent Variable: Number of exercise belief statements agreed with</b>       |          |             |                                |            |             |               |                              |              |
|-----------------------------------------------------------------------------------|----------|-------------|--------------------------------|------------|-------------|---------------|------------------------------|--------------|
| <b>Variables<br/>Model 1<sup>a</sup></b>                                          | <b>B</b> | <b>S.E.</b> | <b>Partial<br/>Correlation</b> | <b>VIF</b> | <b>Sig.</b> | <b>Exp(B)</b> | <b>95% CI for<br/>EXP(B)</b> |              |
|                                                                                   |          |             |                                |            |             |               | <b>Lower</b>                 | <b>Upper</b> |
| <i>Has your GP ever referred you to a physiotherapist for your painful joint?</i> | 0.457    | 0.406       | 0.129                          | 1.01       | 0.264       | 0.120         | -0.352                       | 1.267        |
| <i>Sex</i>                                                                        | -1.011   | 0.502       | -0.227                         | 1.009      | 0.048       | -0.215        | -2.011                       | -0.011       |
| <i>Number of comorbidities</i>                                                    | -0.361   | 0.128       | 0.309                          | 1.009      | 0.006       | -0.300        | -0.616                       | -0.106       |
| <i>Constant</i>                                                                   | 7.772    | 0.686       | -                              | -          | 0.000       | -             | 6.405                        | 9.138        |
| <b>Model 2<sup>b</sup></b>                                                        |          |             |                                |            |             |               |                              |              |
| <i>Have you seen a physiotherapist for your painful joint?</i>                    | 1.060    | 0.383       | 0.288                          | 1.138      | 0.007       | 0.287         | 0.299                        | 1.821        |
| <i>Sex</i>                                                                        | -0.723   | 0.362       | -0.212                         | 1.003      | 0.049       | -0.194        | -1.444                       | -0.003       |
| <i>How long have you been experiencing pain in your joint?</i>                    | -0.204   | 0.099       | -0.219                         | 1.163      | 0.042       | -0.216        | -0.400                       | -0.008       |
| <i>Number of comorbidities</i>                                                    | -0.293   | 0.119       | -0.257                         | 1.026      | 0.016       | -0.241        | -0.530                       | -0.055       |
| <i>Constant</i>                                                                   | 7.680    | 0.585       | -                              | -          | 0.000       | -             | 6.034                        | 9.653        |

<sup>a</sup>Model variables removed due to non-significance (1): *How long have you been experiencing pain in your joint?*, *How would you rate the pain and symptoms you are experiencing in your hip and/or knee on an average day?*.

<sup>b</sup>Model variables removed due to non-significance (2): *How would you rate the pain and symptoms you are experiencing in your hip and/or knee on an average day?*. B, beta coefficient; GP, general practitioner; OA, osteoarthritis; PT, physiotherapist; PwOA, people with osteoarthritis; S.E., standard error; VIF, variance inflation factor.

1  
2  
3  
4  
5  
6  
7  
8  
9  
10  
11  
12  
13  
14  
15  
16  
17  
18  
19  
20  
21  
22  
23  
24  
25  
26  
27  
28  
29  
30  
31  
32  
33  
34  
35  
36  
37  
38  
39  
40  
41  
42  
43  
44  
45  
46  
47  
48  
49  
50  
51  
52  
53  
54  
55  
56  
57  
58  
59  
60STROBE Statement—Checklist of items that should be included in reports of *cross-sectional studies*

|                              | Item No | Recommendation                                                                                                                                                                                    | Page No |
|------------------------------|---------|---------------------------------------------------------------------------------------------------------------------------------------------------------------------------------------------------|---------|
| <b>Title and abstract</b>    | 1       | (a) Indicate the study's design with a commonly used term in the title or the abstract                                                                                                            | 1       |
|                              |         | (b) Provide in the abstract an informative and balanced summary of what was done and what was found                                                                                               | 1       |
| <b>Introduction</b>          |         |                                                                                                                                                                                                   |         |
| Background/rationale         | 2       | Explain the scientific background and rationale for the investigation being reported                                                                                                              | 3-4     |
| Objectives                   | 3       | State specific objectives, including any prespecified hypotheses                                                                                                                                  | 4       |
| <b>Methods</b>               |         |                                                                                                                                                                                                   |         |
| Study design                 | 4       | Present key elements of study design early in the paper                                                                                                                                           | 4-5     |
| Setting                      | 5       | Describe the setting, locations, and relevant dates, including periods of recruitment, exposure, follow-up, and data collection                                                                   | 4-5     |
| Participants                 | 6       | (a) Give the eligibility criteria, and the sources and methods of selection of participants                                                                                                       | 5       |
| Variables                    | 7       | Clearly define all outcomes, exposures, predictors, potential confounders, and effect modifiers. Give diagnostic criteria, if applicable                                                          | 5-6     |
| Data sources/<br>measurement | 8*      | For each variable of interest, give sources of data and details of methods of assessment (measurement). Describe comparability of assessment methods if there is more than one group              | 5-7     |
| Bias                         | 9       | Describe any efforts to address potential sources of bias                                                                                                                                         | n/a     |
| Study size                   | 10      | Explain how the study size was arrived at                                                                                                                                                         | n/a     |
| Quantitative variables       | 11      | Explain how quantitative variables were handled in the analyses. If applicable, describe which groupings were chosen and why                                                                      | 5-6     |
| Statistical methods          | 12      | (a) Describe all statistical methods, including those used to control for confounding                                                                                                             | 6-7     |
|                              |         | (b) Describe any methods used to examine subgroups and interactions                                                                                                                               | 6-7     |
|                              |         | (c) Explain how missing data were addressed                                                                                                                                                       | 7       |
|                              |         | (d) If applicable, describe analytical methods taking account of sampling strategy                                                                                                                | 6-7     |
|                              |         | (e) Describe any sensitivity analyses                                                                                                                                                             | n/a     |
| <b>Results</b>               |         |                                                                                                                                                                                                   |         |
| Participants                 | 13*     | (a) Report numbers of individuals at each stage of study—eg numbers potentially eligible, examined for eligibility, confirmed eligible, included in the study, completing follow-up, and analysed | 7       |
|                              |         | (b) Give reasons for non-participation at each stage                                                                                                                                              | 7       |
|                              |         | (c) Consider use of a flow diagram                                                                                                                                                                | n/a     |
| Descriptive data             | 14*     | (a) Give characteristics of study participants (eg demographic, clinical, social) and information on exposures and potential confounders                                                          | Table 1 |
|                              |         | (b) Indicate number of participants with missing data for each variable of interest                                                                                                               | Table 1 |

|                          |     |                                                                                                                                                                                                              |                       |
|--------------------------|-----|--------------------------------------------------------------------------------------------------------------------------------------------------------------------------------------------------------------|-----------------------|
| Outcome data             | 15* | Report numbers of outcome events or summary measures                                                                                                                                                         | Page 7,<br>Figure 1-3 |
| Main results             | 16  | (a) Give unadjusted estimates and, if applicable, confounder-adjusted estimates and their precision (eg, 95% confidence interval). Make clear which confounders were adjusted for and why they were included | Table 3               |
|                          |     | (b) Report category boundaries when continuous variables were categorized                                                                                                                                    | n/a                   |
|                          |     | (c) If relevant, consider translating estimates of relative risk into absolute risk for a meaningful time period                                                                                             | n/a                   |
| Other analyses           | 17  | Report other analyses done—eg analyses of subgroups and interactions, and sensitivity analyses                                                                                                               | n/a                   |
| <b>Discussion</b>        |     |                                                                                                                                                                                                              |                       |
| Key results              | 18  | Summarise key results with reference to study objectives                                                                                                                                                     | 14-15                 |
| Limitations              | 19  | Discuss limitations of the study, taking into account sources of potential bias or imprecision. Discuss both direction and magnitude of any potential bias                                                   | 18                    |
| Interpretation           | 20  | Give a cautious overall interpretation of results considering objectives, limitations, multiplicity of analyses, results from similar studies, and other relevant evidence                                   | 16,17                 |
| Generalisability         | 21  | Discuss the generalisability (external validity) of the study results                                                                                                                                        | 18                    |
| <b>Other information</b> |     |                                                                                                                                                                                                              |                       |
| Funding                  | 22  | Give the source of funding and the role of the funders for the present study and, if applicable, for the original study on which the present article is based                                                | 18                    |

\*Give information separately for exposed and unexposed groups.

**Note:** An Explanation and Elaboration article discusses each checklist item and gives methodological background and published examples of transparent reporting. The STROBE checklist is best used in conjunction with this article (freely available on the Web sites of PLoS Medicine at <http://www.plosmedicine.org/>, Annals of Internal Medicine at <http://www.annals.org/>, and Epidemiology at <http://www.epidem.com/>). Information on the STROBE Initiative is available at [www.strobe-statement.org](http://www.strobe-statement.org).

# BMJ Open

## Guideline-based exercise management for hip and knee osteoarthritis: a cross-sectional comparison of healthcare professional and patient beliefs in Ireland.

|                                 |                                                                                                                                                                                                                                                                                                                                                                                                                                                                                                                                                                                                                                                                                                                                                                                                                                                                                                                                                                                                                                                                                                                     |
|---------------------------------|---------------------------------------------------------------------------------------------------------------------------------------------------------------------------------------------------------------------------------------------------------------------------------------------------------------------------------------------------------------------------------------------------------------------------------------------------------------------------------------------------------------------------------------------------------------------------------------------------------------------------------------------------------------------------------------------------------------------------------------------------------------------------------------------------------------------------------------------------------------------------------------------------------------------------------------------------------------------------------------------------------------------------------------------------------------------------------------------------------------------|
| Journal:                        | <i>BMJ Open</i>                                                                                                                                                                                                                                                                                                                                                                                                                                                                                                                                                                                                                                                                                                                                                                                                                                                                                                                                                                                                                                                                                                     |
| Manuscript ID                   | bmjopen-2023-080646.R1                                                                                                                                                                                                                                                                                                                                                                                                                                                                                                                                                                                                                                                                                                                                                                                                                                                                                                                                                                                                                                                                                              |
| Article Type:                   | Original research                                                                                                                                                                                                                                                                                                                                                                                                                                                                                                                                                                                                                                                                                                                                                                                                                                                                                                                                                                                                                                                                                                   |
| Date Submitted by the Author:   | 14-Feb-2024                                                                                                                                                                                                                                                                                                                                                                                                                                                                                                                                                                                                                                                                                                                                                                                                                                                                                                                                                                                                                                                                                                         |
| Complete List of Authors:       | Toomey, Clodagh; University of Limerick, School of Allied Health; University of Limerick Health Research Institute<br>Bhardwaj, Avantika; University of Limerick, School of Allied Health; University of Limerick Health Research Institute<br>Browne, Jacqui; IMPACT Steering Committee, Patient Representative<br>Dowling, Ian; Ian Dowling Physiotherapy Clinic<br>Grealis, Stacey; IMPACT Steering Committee, Patient Representative; University College Dublin, Centre of Arthritis Research<br>Hayes, Peter; University of Limerick, School of Medicine; University of Limerick Health Research Institute<br>Higgins, Niall; University of Limerick, School of Allied Health<br>Maguire, Darragh; National Orthopaedic Hospital Cappagh, Physiotherapy Department<br>O’Hora, John; Health Service Executive, Community Healthcare West<br>Rector, Joseph; University of Limerick, School of Allied Health<br>Wood-Thornsbury, Arianna; University of Limerick, School of Allied Health<br>Kennedy, Norelee; University of Limerick, School of Allied Health; University of Limerick Health Research Institute |
| <b>Primary Subject Heading</b>: | Evidence based practice                                                                                                                                                                                                                                                                                                                                                                                                                                                                                                                                                                                                                                                                                                                                                                                                                                                                                                                                                                                                                                                                                             |
| Secondary Subject Heading:      | Rheumatology, Rehabilitation medicine, Patient-centred medicine                                                                                                                                                                                                                                                                                                                                                                                                                                                                                                                                                                                                                                                                                                                                                                                                                                                                                                                                                                                                                                                     |
| Keywords:                       | Physical Therapy Modalities, RHEUMATOLOGY, Protocols & guidelines < HEALTH SERVICES ADMINISTRATION & MANAGEMENT, Hip < ORTHOPAEDIC & TRAUMA SURGERY, Knee < ORTHOPAEDIC & TRAUMA SURGERY                                                                                                                                                                                                                                                                                                                                                                                                                                                                                                                                                                                                                                                                                                                                                                                                                                                                                                                            |
|                                 |                                                                                                                                                                                                                                                                                                                                                                                                                                                                                                                                                                                                                                                                                                                                                                                                                                                                                                                                                                                                                                                                                                                     |

SCHOLARONE™  
Manuscripts



I, the Submitting Author has the right to grant and does grant on behalf of all authors of the Work (as defined in the below author licence), an exclusive licence and/or a non-exclusive licence for contributions from authors who are: i) UK Crown employees; ii) where BMJ has agreed a CC-BY licence shall apply, and/or iii) in accordance with the terms applicable for US Federal Government officers or employees acting as part of their official duties; on a worldwide, perpetual, irrevocable, royalty-free basis to BMJ Publishing Group Ltd ("BMJ") its licensees and where the relevant Journal is co-owned by BMJ to the co-owners of the Journal, to publish the Work in this journal and any other BMJ products and to exploit all rights, as set out in our [licence](#).

The Submitting Author accepts and understands that any supply made under these terms is made by BMJ to the Submitting Author unless you are acting as an employee on behalf of your employer or a postgraduate student of an affiliated institution which is paying any applicable article publishing charge ("APC") for Open Access articles. Where the Submitting Author wishes to make the Work available on an Open Access basis (and intends to pay the relevant APC), the terms of reuse of such Open Access shall be governed by a Creative Commons licence – details of these licences and which [Creative Commons](#) licence will apply to this Work are set out in our licence referred to above.

Other than as permitted in any relevant BMJ Author's Self Archiving Policies, I confirm this Work has not been accepted for publication elsewhere, is not being considered for publication elsewhere and does not duplicate material already published. I confirm all authors consent to publication of this Work and authorise the granting of this licence.

1  
2  
3 **Guideline-based exercise management for hip and knee osteoarthritis: a cross-**  
4 **sectional comparison of healthcare professional and patient beliefs in Ireland.**  
5  
6  
7

8  
9 **ABSTRACT**  
10

11 **Objectives:** To identify within-stakeholder agreement and between-stakeholder differences  
12 in beliefs regarding exercise for osteoarthritis among general practitioners (GPs),  
13 physiotherapists (PTs) and people with hip and knee osteoarthritis (PwOA). A secondary  
14 objective was to explore how referral patterns may influence beliefs.  
15  
16

17  
18 **Design:** Cross-sectional  
19

20  
21 **Setting:** Online surveys administered to GPs, PTs and PwOA in Ireland via social media  
22 and healthcare networks.  
23

24  
25 **Participants:** 421 valid responses (n=161 GPs, n=163 PTs, n=97 PwOA).  
26

27 **Primary and secondary outcome measures:** Nine beliefs statements related to exercise  
28 effectiveness, safety and delivery were rated on a 5-point Likert scale and analysed for  
29 within-stakeholder consensus. Chi-square tests assessed differences in agreement between  
30 groups. Multivariable linear regression models tested associations between beliefs in PwOA  
31 and referral to/attendance at physiotherapy.  
32  
33

34  
35 **Results:** Positive within-stakeholder consensus (>75% agreement) was reached for most  
36 statements (7/9 GPs, 6/9 PTs, 5/9 PwOA). However, beliefs of PwOA were significantly less  
37 positive compared to healthcare professionals for six statements. All stakeholders disagreed  
38 that exercise is effective regardless of the level of pain. Attendance at physiotherapy (49% of  
39 PwOA), rather than referral to physiotherapy from a GP only, was associated with positive  
40 exercise beliefs for PwOA [ $\beta=0.287$  (95% CI 0.299, 1.821)].  
41  
42  
43  
44

45  
46 **Conclusions:** Beliefs about exercise therapy for osteoarthritis are predominantly positive  
47 across all stakeholders, albeit less positive in PwOA. PwOA are more likely to have positive  
48 beliefs if they have seen a physiotherapist for their osteoarthritis. Knowledge translation  
49 should highlight the effectiveness of exercise for all levels of pain and osteoarthritis disease.  
50  
51

52  
53  
54 **Strengths and Limitations**  
55

- 56  
57
  - 58 • Differences in beliefs about exercise between healthcare professionals and patients  
59 with osteoarthritis has not previously been examined.  
60

- This study also explored how healthcare professional visits may influence beliefs about effectiveness of evidence-based care.
- This was a cross-sectional study so no inferences can be made.
- Different results with respect to beliefs and influences may have been found if non-online recruitment methods were available (e.g. paper surveys in healthcare settings).

For peer review only



## INTRODUCTION

The management of hip and knee osteoarthritis (OA), as for other chronic conditions, should be determined by best available evidence. Although there is no cure for this burdensome disease, healthcare professionals in this field have for a long time had a wealth of high-quality evidence to draw from, all pointing to optimal core clinical management that consists of land-based exercise, education and weight loss if appropriate[1,2]. Despite this, implementation of these guidelines in practice is not optimal, often resulting in care that is fragmented in nature or considered low-value [3]. A global meta-analysis involving 16,103 people with OA (PwOA) in community care, revealed that only 39% received a referral or recommendation to exercise,[4] while a UK-based survey in 2018 revealed that only 3.9% of the 502 respondents with an OA diagnosis, were using exercise as part of their management[5]. Some similarities in shortcomings to implementation of guidelines for musculoskeletal health have been identified globally[6].

Alongside use of best evidence, the provision of patient-centred care is a pillar of high-quality care that should help guide treatment for PwOA[7]. Literature and expert opinion recommendations state that it is important to assess patient ideas and concerns regarding the cause and management of their pain, and to take into account their expectations and preferences for treatment[7]. Regarding exercise, researchers have identified a considerable amount of uncertainty among PwOA regarding the benefits of exercise for their pain. Results from cross-sectional surveys and semi-structured interviews have indicated that a lack of knowledge on the condition may result in patients believing that surgery is their only option[9,10]. Furthermore, a view of OA as a “wear and tear” condition was associated with the perspective that exercise was a counterintuitive treatment[9–11]. Since it is widely understood that beliefs influence health-related behaviours [12,13], and because stronger recommendations for exercise have been made since previous publications[2,5,10], an updated understanding of how PwOA view exercise is required.

Healthcare professionals’ perceptions and beliefs will affect the advice and management they offer patients, and researchers have suggested that those with biomedical or biomechanical beliefs about OA may transfer these beliefs to their patients, thus affecting their treatment choices[14,15]. Currently, general practitioners (GPs) and physiotherapists (PTs) are considered among the core care providers for PwOA[16]. While PT’s have the knowledge and skills to adopt a key role in the management of hip and knee OA, GPs remain the most frequently accessed source of formal medical advice and treatment[16,17]. The language used by healthcare professionals, especially GPs, can have a profound influence on patients’ beliefs[18,19]. A systematic review from Cottrell et al [20] in 2010,

1  
2  
3 found that the attitudes and beliefs of GPs concerning exercise and chronic knee pain varied  
4 widely. An updated UK-based survey of GPs in 2017 found that perspectives were positive,  
5 with 87% reporting the use of exercise in their practice [17]. However, only 11% reported  
6 using exercise in ways that aligned with evidence-based guidelines [17]. This demonstrates  
7 the need for a better understanding of how GPs interact with up-to-date resources for care  
8 advancements for OA, in a time-demanding profession.  
9  
10  
11  
12

13 A scoping review of qualitative research exploring attitudes and beliefs, shows that PTs  
14 generally have a positive attitude to activity and exercise in OA management, despite  
15 indications that some PTs may also be lacking up-to-date knowledge about best practice or  
16 may not be adhering to evidence-based treatments[21]. In contrast, a recent mixed-methods  
17 evaluation by Barton et al [22] in 2021 reported that awareness regarding evidence  
18 supporting exercise for knee OA was good (89–96%) amongst PTs in Australia and Canada.  
19  
20  
21  
22

23 Greater knowledge around beliefs and belief influencers are needed in order to address  
24 negative beliefs or myths associated with exercise and joint pain. The objective of this study  
25 was to identify within-stakeholder agreement and between-stakeholder differences in beliefs  
26 in relation to statements on exercise for management of hip and knee OA in PwOA, GPs and  
27 PTs. Secondary objectives were to explore any associations between beliefs of PwOA and  
28 whether they had ever received a GP referral to physiotherapy or had seen a PT for their  
29 painful joint. Based on previous work [10,14,17], it was hypothesised that exercise beliefs of  
30 PTs would be more positive, and in line with clinical guidelines and latest evidence,  
31 compared to GPs and PwOA. It was also hypothesised that PwOA who had received a  
32 physiotherapy referral from their GP, or who had seen a PT for their condition would have  
33 more positive beliefs about exercise compared to those who had not.  
34  
35  
36  
37  
38  
39  
40

## 41 **METHODS**

### 42 **Design and Recruitment**

43  
44  
45 This study incorporates an analysis of three cross-sectional online surveys administered to  
46 three stakeholder groups - GPs, PTs and PwOA – in Ireland between March and September  
47 2021. This cross-sectional study is embedded in a larger study (IMPACT – Implementation  
48 of osteoarthritis clinical guidelines together)[23], that aims to co-design and evaluate  
49 implementation strategies for an exercise and education programme for PwOA in Ireland.  
50 Surveys were adapted from previous studies in this field [10,14,17] and reviewed by co-  
51 researchers of a public and patient involvement (PPI) steering committee of representative  
52 stakeholders prior to distribution. Validation consisted of a round of pre-testing with a  
53 convenience sample of three of each GPs, PTs and PwOA with feedback provided on  
54 readability, acceptability and appropriateness that was incorporated before distribution.  
55  
56  
57  
58  
59  
60

1  
2  
3 Qualtrics© software (Qualtrics, Provo, UT) was used to administer the online surveys and all  
4 procedures were approved by the University of Limerick Faculty of Education & Health  
5 Sciences Research Ethics Committee (REC) (2020\_12\_13\_EHS) and the Irish College of  
6 General Practitioners REC (ICGP\_REC\_21\_0006). Surveys were completed anonymously  
7 after participants were provided with a participant information sheet and consent was implied  
8 by completion of the survey. Reporting is consistent with the Strengthening the Reporting of  
9 Observational Studies in Epidemiology (STROBE) guidelines for cross-sectional studies.  
10  
11

12  
13  
14  
15 The PT survey was distributed via email invite to all members of the Irish Society of  
16 Chartered Physiotherapists (n=2022), working across all fields. The survey was also  
17 advertised via social media (Twitter, LinkedIn) and amongst networks of researchers and  
18 PPI steering committee members. Physiotherapists were eligible for inclusion if they: (1)  
19 were practicing in Ireland, and (2) treated a patient with hip or knee OA in the past six  
20 months. The GP survey was distributed to the Irish College of General Practitioners network  
21 (n=3152), the University of Limerick Education and Research Network for General Practice  
22 (ULEARN-GP) network[24] (n=140) and via social media (Twitter, LinkedIn). GPs were  
23 eligible to take part if they were currently treating patients with hip and/or knee pain in  
24 Ireland. The survey for PwOA was advertised via social media (Twitter, LinkedIn), Arthritis  
25 Ireland social media, News Rheum patient newsletter and colleagues and networks of  
26 project steering committee and research team members. PwOA were eligible to take part if  
27 they (1) were living on the island of Ireland, (2) at least 30 years of age, (3) had chronic hip  
28 or knee pain for at least 6 months or more, and (4) did not have joint replacement surgery on  
29 at least one of the painful hips or knees. Strategies to increase recruitment via social media  
30 across all three surveys were adopted including tagging specific advocacy groups, patient or  
31 professional organisations and influencers, providing visual infographics alongside social  
32 media posts and aligning posts with events e.g. National Arthritis Day.  
33  
34  
35  
36  
37  
38  
39  
40  
41  
42  
43

#### 44 **Outcomes**

45  
46 Each survey (Supplementary file 1) included an initial set of questions related to participant  
47 demographics. For healthcare professionals, these included questions on sex [are you: (1)  
48 Male, (2) Female, (3) Prefer not to say], length of time qualified, work setting, details of  
49 specific post-qualification training related to OA/chronic pain, confidence in treating hip and  
50 knee OA, percentage of typical caseload with hip or knee OA and where they prefer to  
51 access knowledge of management for persons with hip or knee OA. For PwOA,  
52 demographic information related to sex [are you: (1) Male, (2) Female, (3) Prefer not to say],  
53 age category, geographical area and health conditions were asked. In relation to joint pain,  
54 questions regarding location, duration, severity, referrals to exercise, and use of clinical  
55  
56  
57  
58  
59  
60

1  
2  
3 guideline specific treatments (muscle strengthening, aerobic exercise, education, weight  
4 loss) were asked. Additional questions were provided for PwOA to understand healthcare  
5 utilisation and previous experiences with exercise.  
6  
7

8  
9 In each survey, a list of statements on exercise beliefs for hip and knee OA were provided  
10 and were rated on a 5-point Likert scale from strongly agree to strongly disagree. The belief  
11 statements were intended to align with current evidence-based guidelines[1,2] and best  
12 practice for exercise and OA. Healthcare professionals were given a more extensive list of  
13 statements that were related to exercise type or referral decisions. A final section related to  
14 barriers and enablers to exercise delivery, referral or uptake was included in each survey.  
15 Results of that analysis are presented elsewhere.  
16  
17  
18  
19

### 20 **Statistical Analysis**

21  
22 Demographic outcomes were summarised as counts/proportions as appropriate. Belief  
23 statements were grouped and summarised descriptively by theme i.e., exercise type and  
24 effectiveness, exercise safety and exercise delivery. Although some statements had slightly  
25 different wording to facilitate understanding and relevance to each group, there were nine  
26 statements that were deemed to be comparable across groups and used to analyse  
27 differences in beliefs. Responses for the 5-point Likert scale statements were collapsed to a  
28 binary scale to label positive beliefs (“strongly agree” or “somewhat agree”) vs. negative  
29 beliefs (“strongly disagree”, “somewhat disagree” or “neither”). “Neither” was included with  
30 negative beliefs since statements were deemed to align somewhat with best practice and  
31 anything short of agreement may be considered unsatisfactory knowledge translation or  
32 personal experience. A commonly defined cut-off for consensus (>75%)[25] between  
33 stakeholders was used. Chi-square (2 x 3) tests of independence were used to assess  
34 differences in agreement with statements between three groups, and Bonferroni adjustment  
35 for between-group differences (p<0.05). Multivariable linear regression was used to explore  
36 associations between exercise beliefs (number of statements agreed with (range 0-9)) in  
37 PwOA and (1) physiotherapy referral from their GP (*Has your GP ever referred you to a*  
38 *physiotherapist for your painful joint? Yes/No*), and (2) physiotherapy attendance (*Have you*  
39 *seen a physiotherapist for your painful joint? Yes/No*). Histograms, Kolmogorov-Smirnov  
40 tests and scatter plots of residuals vs. fitted values were used to test assumptions of Poisson  
41 and linear regression and linear regression was deemed more appropriate. Pearson  
42 correlation coefficients (r>0.5) and variance inflation factor (>5) were used to determine  
43 presence of collinearity between variables. Based on correlates of physical activity for hip  
44 and knee OA from previous literature, the following covariates were included using an enter  
45 method in each model: sex[26], average pain rating (none/mild/moderate/severe)[26], pain  
46  
47  
48  
49  
50  
51  
52  
53  
54  
55  
56  
57  
58  
59  
60

1  
2  
3 duration (6 months-1 year /1-2 years /2-3 years /3-4 years /4+ years)[27] and number of  
4 comorbidities[26]. The most parsimonious models were reported checking for a 10%  
5 difference in beta coefficients upon removal of covariates ( $p>0.05$ ). Data were analysed  
6 using IBM-SPSS version 26.0.0 and Microsoft Excel365.  
7  
8  
9

## 10 **Patient and public involvement**

11  
12 This research was conducted as part of a larger project (IMPACT) that uses a participatory  
13 health research approach. A steering committee of key stakeholders with relevant research,  
14 clinical/system expertise or lived experience (academics, people with arthritis, patient  
15 advocacy group members, physiotherapists, GPs, orthopaedic surgeon) have oversight of  
16 the project from inception to dissemination. Members of the committee were involved in  
17 designing the research question and outcome measures for these surveys, recruitment of  
18 participants, interpretation of analyses and dissemination as co-authors of the publication.  
19  
20  
21  
22  
23

## 24 **RESULTS**

25  
26 There was a total of 421 valid responses from the three distributed surveys, comprising 161  
27 GPs, 163 PTs and 97 PwOA. An additional 26 GP, 33 PT and 15 PwOA surveys were  
28 collected but were not fully completed or did not contain sufficient data for analysis so were  
29 excluded. Demographic data for each stakeholder are presented in **Table 1**.  
30  
31  
32

### 33 **Experiences with Exercise for People with Osteoarthritis**

34  
35 Of the 97 PwOA, 78.4% ( $n=76$ ) had spoken to their GP regarding their joint pain, 63.9%  
36 ( $n=62$ ) had an X-ray of their joint. 44.6% ( $n=43$ ) had been referred to physiotherapy by their  
37 GP and 48.5% ( $n=47$ ) had seen a physiotherapist for their joint (either through GP- or self-  
38 referral). Additionally, 50.5% ( $n=49$ ) reported having been given specific exercises for their  
39 joint by any healthcare professional. All but 5 respondents reported that this healthcare  
40 professional was a physiotherapist. Others included orthopaedic surgeon ( $n=2$ ),  
41 rheumatologist ( $n=1$ ) and GP ( $n=1$ ). **Figure 1** shows answers to questions regarding the  
42 types of treatments tried by PwOA, as per clinical guideline recommendations (aerobic  
43 exercise, strengthening exercise, education and weight management).  
44  
45  
46  
47  
48  
49

### 50 **Within-Stakeholder Agreement in Beliefs about Exercise Type and Effectiveness, 51 Exercise Safety and Delivery**

52  
53 **Figure 2** shows the Likert scale results in each stakeholder group for statements (a-d),  
54 related to the effectiveness of different types of exercise and for different levels of pain or  
55 perceived severity. **Figure 3** shows the Likert scale results in each stakeholder group for  
56 statements (e-i), related to the safety and delivery of different types of exercise for people  
57  
58  
59  
60

with OA. Beliefs were predominantly positive amongst GP's [positive consensus (>75% agreement) on 7/9 statements], PTs (6/9 statements) and PwOA (5/9 statements).

### Between-Stakeholder Differences in Beliefs about Exercise Type and Effectiveness, Exercise Safety and Delivery

Results of chi-square tests for differences in agreement between stakeholders across beliefs statements are presented in **Table 2**. There were differences in stakeholder responses across all statements, except for statement (d): "Exercise works just as well for everybody, regardless of the amount of pain they have" ( $X^2 = 5.14$ ,  $p=0.076$ ). All three stakeholder groups reached a negative consensus regarding this statement. In six of the eight statements where differences were observed, patient beliefs were significantly different to healthcare professional beliefs. There were two statements with a medium effect size for differences between PwOA and service providers: statements (b) "Hip and knee problems can be improved by specific muscle strengthening exercises" ( $V=0.309$ ) and (h) "Most patients with hip or knee OA would benefit from a supervised group exercise programme" ( $V=0.384$ ). All other differences had a small effect size.

**Table 1.** Descriptive statistics using count (proportions) for healthcare professionals and people with osteoarthritis demographics

| Healthcare Professionals Demographics                   | GP (n=161) | PT (n=163) | People with Hip or Knee Osteoarthritis Demographics | PwOA N=97 |
|---------------------------------------------------------|------------|------------|-----------------------------------------------------|-----------|
|                                                         | Count (%)  | Count (%)  |                                                     | Count (%) |
| <b>Sex:</b>                                             |            |            | <b>Sex:</b>                                         |           |
| Female                                                  | 88 (54.7)  | 128 (78.5) | Female                                              | 76 (78.4) |
| Male                                                    | 72 (44.7)  | 34 (20.9)  | Male                                                | 20 (20.6) |
| Prefer not to say                                       | 1 (0.6)    | 1 (0.6)    | Prefer not to say                                   | 1 (1.0)   |
| <b>How long have you been qualified?</b>                |            |            | <b>Most bothersome joint:</b>                       |           |
| Less than 5 years                                       | 33 (20.5)  | 19 (11.7)  | Knee                                                | 52 (53.8) |
| 5-10 years                                              | 25 (15.5)  | 21 (12.9)  | Hip                                                 | 45 (46.4) |
| More than 10 years                                      | 103 (64.0) | 123 (75.5) | <b>Age Category:</b>                                |           |
| <b>Work practice setting (GPs)</b>                      |            |            | 30-39 years                                         | 12 (12.4) |
| Urban                                                   | 60 (37.3)  | -          | 40-49 years                                         | 24 (24.7) |
| Rural                                                   | 34 (21.1)  | -          | 50-59 years                                         | 30 (30.9) |
| Mixed                                                   | 67 (41.6)  | -          | 60-69 years                                         | 25 (25.8) |
| <b>Work practice setting (PTs)</b>                      |            |            | 70-79 years                                         | 6 (6.2)   |
| Public hospital                                         | -          | 38 (23.3)  | <b>Living Location:</b>                             |           |
| Private hospital                                        | -          | 7 (4.3)    | Inner city or suburb                                | 46 (47.4) |
| Primary care                                            | -          | 41 (25.2)  | Town                                                | 16 (16.5) |
| Private practice clinic                                 | -          | 70 (42.9)  | Village                                             | 15 (15.5) |
| Other                                                   | -          | 7 (4.3)    | Open country                                        | 20 (20.6) |
| <b>Post-qualification training on OA / chronic pain</b> |            |            | <b>No. of other comorbidities:</b>                  |           |
| No                                                      | 72 (44.7)  | 37 (22.7)  | 0                                                   | 31 (32.0) |
| Inservice/webinars/reading                              | 32 (19.9)  | 17 (10.4)  | 1-2                                                 | 45 (47.9) |
| Course or conference                                    | 28 (17.4)  | 72 (44.2)  | 3+                                                  | 18 (19.1) |

|                                               |            |           |                                 |                                                   |           |
|-----------------------------------------------|------------|-----------|---------------------------------|---------------------------------------------------|-----------|
| Diploma/APP or certification                  | 15 (9.3)   | 3 (1.8)   | <b>Multi-joint pain(&gt;1):</b> | No                                                | 6 (6.2)   |
| MSc in related field                          | 14 (8.7)   | 32 (19.6) |                                 | Yes                                               | 91 (93.8) |
| PhD in related field                          | 0          | 2 (1.2)   |                                 | <b>Rating of pain /symptoms on an average day</b> |           |
| <b>Confidence in treating hip and knee OA</b> |            |           | <b>Duration of pain</b>         |                                                   |           |
| Not confident                                 | 2 (1.2)    | 0         | No pain/symptoms                | 1 (1.0)                                           |           |
| Slightly confident                            | 33 (20.5)  | 5 (3.1)   | Mild                            | 30 (30.9)                                         |           |
| Confident                                     | 80 (49.7)  | 41 (25.2) | Moderate                        | 49 (50.5)                                         |           |
| Very confident                                | 36 (22.4)  | 86 (52.8) | Severe                          | 17 (17.5)                                         |           |
| Extremely confident                           | 10 (6.2)   | 31 (19.0) | <b>Duration of pain</b>         |                                                   |           |
| <b>% of typical caseload with hip/knee OA</b> |            |           | 6 mon – 1 year                  | 24 (24.7)                                         |           |
| 1-5%                                          | 19 (11.8)  | 19 (11.7) | 1-2 years                       | 13 (13.4)                                         |           |
| 6-25%                                         | 117 (72.7) | 83 (50.9) | 2-3 years                       | 15 (15.5)                                         |           |
| 26-50%                                        | 24 (14.9)  | 36 (22.1) | 3-4 years                       | 11 (11.3)                                         |           |
| 51-75%                                        | 1 (0.6)    | 18 (11.0) | More than 4 years               | 34 (35.1)                                         |           |
| >75%                                          | 0          | 5 (3.1)   |                                 |                                                   |           |

APP, Advanced Practice Physiotherapist; GP, General Practitioner; OA, Osteoarthritis; PT, Physiotherapist; PwOA, People with Osteoarthritis.

**Table 2.** Differences in agreement with statements between general practitioner (GP; n=161), physiotherapist (PT; n=163) and people with hip and knee osteoarthritis (PwOA; n=97). Agreement was defined as those who selected “strongly agree” or “somewhat agree” on Likert scales. Proportions that reached within-stakeholder “consensus”, defined as >75% majority, are in bold.

| Statement                                                                                               | Proportion in agreement |                           |                           | Chi-Square | Significance | Cramer's V |
|---------------------------------------------------------------------------------------------------------|-------------------------|---------------------------|---------------------------|------------|--------------|------------|
|                                                                                                         | GP                      | PT                        | PwOA                      |            |              |            |
| <b>(a) Hip and knee problems can be improved by general exercise e.g. walking and swimming</b>          | <b>97.5%</b>            | <b>95.1%</b>              | <b>85.6%</b> <sup>a</sup> | 15.59      | <0.0001      | 0.193      |
| <b>(b) Hip and knee problems can be improved by specific muscle strengthening exercises</b>             | <b>98.8%</b>            | <b>97.5%</b>              | <b>80.9%</b> <sup>a</sup> | 39.04      | <0.0001      | 0.309      |
| <b>(c) Exercise is effective for patients if an x-ray shows severe osteoarthritis</b>                   | 53.8%                   | 63.4%                     | 39.8% <sup>c</sup>        | 13.24      | 0.001        | 0.179      |
| <b>(d) Exercise works just as well for everybody, regardless of the amount of pain they have</b>        | <b>24.2%</b>            | <b>19.6%</b>              | 32.3%                     | 5.14       | 0.076        | n/a        |
| <b>(e) General exercise e.g., walking and swimming is safe for everybody to do</b>                      | <b>85.7%</b>            | 68.9% <sup>b</sup>        | <b>87.1%</b>              | 18.13      | <0.0001      | 0.209      |
| <b>(f) Specific muscle strengthening exercise is safe for everyone to do</b>                            | <b>85.6%</b>            | <b>84.5%</b>              | 69.2% <sup>a</sup>        | 11.86      | 0.003        | 0.170      |
| <b>(g) Every patient with hip or knee OA should try exercise treatment before surgery is considered</b> | <b>86.9%</b>            | <b>99.4%</b> <sup>b</sup> | <b>91.4%</b>              | 19.0       | <0.0001      | 0.214      |
| <b>(h) Most patients with hip or knee OA would benefit from a supervised group exercise programme*</b>  | <b>91.3%</b>            | <b>85.3%</b>              | 52.1% <sup>a</sup>        | 61.35      | <0.0001      | 0.384      |
| <b>(i) Most patients with hip or knee OA would benefit from an individualized exercise programme*</b>   | <b>96.3%</b>            | <b>93.9%</b>              | <b>82.8%</b> <sup>a</sup> | 15.91      | <0.0001      | 0.196      |

<sup>a</sup>Significantly different compared to GP and PT, <sup>b</sup>significantly different to GP and PwOA, <sup>c</sup>significantly different to PT, using Bonferroni at .05 level. \*Questions for PwOA phrased as: “The best way to learn about exercise is in a supervised group setting with people who have similar pain” and “The best way to learn about exercise is

---

in a one-on-one setting with a health professional". Cramer's V =0.1 small, 0.3 medium, 0.5 large effect size.  
GP, general practitioner; OA, osteoarthritis; PT, physiotherapist; PwOA, people with osteoarthritis.

---

## Predictors of Patient Beliefs

There was no association between beliefs of PwOA about exercise and the question: "has your GP ever referred you to a physiotherapist for your painful joint?" (**Supplemental File 2**) [B=0.46 (95% CI -0.35, 1.27)]. In this model, sex (male) [B=-1.01 (95% CI -2.01, -0.01)] and a higher number of comorbidities [B=-0.36 (95% CI -0.62, -0.11)] were negatively associated with beliefs about exercise. In model 2, there was a positive association between beliefs of PwOA about exercise and the question: "Have you seen a physiotherapist for your painful joint?" [B=1.06 (95% CI 0.30, 1.82)]. Sex (male) [B=-0.72 (95% CI -1.44, -0.00)], a longer duration of pain and symptoms [B=-0.20 (95% CI -0.40, -0.01)] and a higher number of comorbidities [B=-0.29 (95% CI -0.53, -0.06)] were negatively associated with beliefs about exercise in this model.

## Healthcare Professional Sources of Education

For the question, "Where do you get your knowledge of care advancements for persons with knee or hip osteoarthritis?"; the top five selected responses for GPs were continuous medical education (CME) or GP training networks (78%), published guidelines or recommendations (61%), reading medical journals (47%), conference attendance (47%) and course attendance (31%). For the question, "Where do you access your knowledge of management for persons with knee or hip osteoarthritis?"; the top five selected responses for PTs were published guidelines or recommendations (85%), reading research articles (75%), clinic protocols and discussion with peers or in-services (70%), course attendance (61%) and conference attendance (47%).

## DISCUSSION

This research identified differences in beliefs about exercise effectiveness, safety and delivery between healthcare professionals and PwOA. While predominantly positive beliefs were observed across stakeholders, there was less consensus regarding the effectiveness of exercise when an X-ray shows "severe" OA. With regards to exercise referral, 48.5% of PwOA had either been referred to or self-referred to a physiotherapist for their joint pain. Referral to a physiotherapist by their GP was not associated with positive exercise beliefs.



1  
2  
3 However, attendance at a physiotherapist for joint pain was associated with positive exercise  
4 beliefs in PwOA.  
5

6  
7 If OA management guidelines do not align with the personal beliefs of service providers or  
8 users, PwOA may not receive high quality care. This study has found that GPs (7/9  
9 statements), PTs (6/9 statements) and PwOA (5/9 statements) have largely positive beliefs  
10 regarding exercise for OA. However, there is less certainty about exercise when an X-ray  
11 shows “severe osteoarthritis” across all stakeholders, and service providers do not agree  
12 that “*exercise works just as well for everybody, regardless of the level of pain they have*”.  
13 These results highlight that beliefs are generally in line with best evidence and clinical  
14 guidelines. However, there may still be some misconceptions about the effectiveness of  
15 exercise for higher levels of pain and disease. Evidence suggests that the pain-relieving  
16 qualities of exercise are effective for even moderate to severe OA disease[28–30], and a  
17 more recent meta-analysis has shown that individuals with higher pain severity at baseline  
18 benefit more from therapeutic exercise than those with lower pain[31]. This evidence should  
19 be a focus of future efforts of knowledge translation to clinicians and PwOA.  
20  
21  
22  
23  
24  
25  
26  
27

28 Some of the beliefs identified in this study are reflective of the traditional view of OA as a  
29 “wear and tear” disease, synonymous with a desire to protect a “damaged” joint on X-ray  
30 from further damage, as found previously[9,21]. However, an encouraging finding from this  
31 research are the overwhelmingly more positive views towards exercise observed compared  
32 to similar studies published on a cohort of UK-based PTs in 2009[14], older adults with knee  
33 pain in 2012[10] and GPs in 2017[17]. Using the comparator of statements with at least  
34 majority view (>50% agreement), in the 2009 study[14], PTs agreed on the benefit of  
35 exercise for knee pain on 4/12 statements (33%), compared to 8/9 similar statements (89%)  
36 in the current study. For older adults with knee pain, there was no agreement for any  
37 statement in the 2012 study[10], compared to 7/9 statements (78%) in the current study. In  
38 the 2017 study[17], GPs agreed on 9/12 statements (75%), compared to 8/9 statements  
39 (89%) in the current study. While some statements varied slightly, stronger exercise  
40 recommendations in clinical guidelines and greater efforts in implementation and translation  
41 to practice in the last 10 years are likely the rationale for these changes, particularly since  
42 clinical guideline updates in 2014[1,2]. However, there is still much space to enact  
43 recommendations from a 2018 Cochrane review to provide better information and advice  
44 about the safety and value of exercise for patients[32]. In particular, providing reassurance  
45 on the role of exercise in managing symptoms, and discussion of opportunities to participate  
46 in activities regarded as enjoyable and relevant, may encourage greater exercise  
47 participation[32].  
48  
49  
50  
51  
52  
53  
54  
55  
56  
57  
58  
59  
60

1  
2  
3 Beliefs of PwOA about exercise were significantly less positive compared to healthcare  
4 professional beliefs for 6/9 statements. The greatest differences were observed for  
5 statements in relation to the benefits of strengthening exercises and group-based exercise.  
6 Given 40% had never tried weight or strength-based training for their joint, and an additional  
7 28% tried, but since stopped this type of exercise, healthcare professionals should be  
8 cognisant of ensuring patients understand the benefit of muscle strengthening and support  
9 patients to find enjoyable and sustainable ways to build these exercises into weekly routines.  
10 While strength-based training is not deemed superior to aerobic type exercise for pain relief  
11 in OA[28,33], knock-on benefits for improvements in physical function, longevity, bone  
12 health, and frailty[34] during ageing are important to highlight. Results for aerobic type  
13 exercise, however, were much more promising as only 14% had not tried this type of  
14 exercise for their joint and 67% were actively using. Further exploration on reasons for  
15 stopping exercise would be of benefit to determine if low adherence is related to barriers to  
16 exercise participation or a lack of perceived improvement in symptoms. While there is no  
17 strong evidence to indicate a difference in effectiveness regarding exercise setting, PwOA  
18 were less likely to agree with the benefits of a supervised group setting compared to service  
19 providers. Additional benefits of group exercise for older adults, such as social support, peer-  
20 learning, improvements in mental health and loneliness, and cost-effectiveness should,  
21 however, be considered and encouraged[35–37].  
22  
23  
24  
25  
26  
27  
28  
29  
30  
31  
32  
33

34 In this study, referral to physiotherapy by a GP was not associated with more positive  
35 exercise beliefs in PwOA, in contrast to what was hypothesised. Although GPs had the most  
36 positive beliefs in comparison with other stakeholders, this finding may reflect the lack of  
37 time in a GP consultation to educate about exercise therapy and influence patient beliefs. A  
38 referral to exercise therapy alone may not be enough. However, seeing a PT for  
39 osteoarthritis was associated with more positive exercise beliefs. This may suggest that PTs  
40 impart important knowledge and education regarding the benefits of exercise to their  
41 patients, that, in turn, changes patient beliefs. Equally, this finding may suggest that PwOA  
42 with more positive exercise beliefs are more likely to attend a PT appointment. Tracking of  
43 changes in beliefs over time is recommended to further explore this association. Compared  
44 to GPs, PTs have more time in a consultation to discuss the effectiveness, mechanism, and  
45 safety of exercise for joint pain, which may help to influence beliefs and maximise the  
46 potential effect of exercise programs by improving adherence[38]. It is known that the  
47 provision of education for OA is superior for patient outcomes when combined with exercise  
48 therapy[39]. Almost 60% of PwOA reported having not tried self-management/education,  
49 despite some programme availability in Ireland[40]. PwOA were not asked specifically if their  
50 GP referred them to a self-management programme, which is a required area of further  
51  
52  
53  
54  
55  
56  
57  
58  
59  
60

1  
2  
3 exploration. Additional efforts are required to support clinicians with resources to deliver  
4 trustworthy educational content for PwOA, or increase knowledge of available self-  
5 management programmes, to ensure clinical recommendations are fully implemented.  
6  
7

8  
9 In the current study, 78% of PwOA had spoken to their GP about their joint pain, while under  
10 50% had been referred to, or self-referred to a PT. Despite OA being amongst the leading  
11 causes of years lived with disability[41], the decision to seek care can be deterred by  
12 negative or dismissive attitudes from healthcare professionals about their non-urgent  
13 condition, or the perception that pain is part of ageing[42]. Healthcare professionals should  
14 take care regarding attitudes and language use during consultations[43] to help promote the  
15 effectiveness of first-line treatment strategies. From the regression analysis, it is also  
16 apparent that men with OA, and people with multiple comorbidities, may require additional  
17 supports to improve positive beliefs about exercise for their condition. Men are at times  
18 considered 'hard to reach' in terms of meaningful engagement with exercise programmes  
19 [44]. For men who do not engage with healthcare services, a suggested route for information  
20 may instead be community support groups or sport organisations, where messaging is  
21 provided by someone who recipients can relate to and get along with[44]. For people living  
22 with the burden of multiple conditions, additional barriers to exercise may require thorough  
23 training of facilitators[45].  
24  
25  
26  
27  
28  
29  
30  
31  
32

33 This study has shown that the most used education sources for healthcare professionals on  
34 management of OA are: published guidelines or recommendations (85% of PTs, 61% of  
35 GPs), use of training networks, in-clinic protocols, discussion and in-services (70% of PTs,  
36 78% of GPs) and reading medical journals or research articles (75% of PTs, 47% of GPs).  
37 Even where clinicians report using clinical guidelines and research to guide practice, this is  
38 no guarantee that the most up-to-date recommendations are being used with confidence, or  
39 that they are being interpreted, recalled or implemented appropriately[46]. In contrast to this  
40 study, previous international investigations have shown that only a small proportion of sport  
41 and musculoskeletal PTs use research articles to change their clinical practice (10.4%)[47].  
42 Over half of PTs instead cited "interactions with colleagues" and "attending private education  
43 short courses" as the source for change[47]. Given the high proportion of GPs that use CME  
44 small groups and training networks, peer-learning opportunities may be a viable source of  
45 intervention to ensure practice guidelines are being met[48]. The evidence to practice gap  
46 could be filled with clinical guideline supplements that address contextual barriers and time  
47 needed to treat[49], and courses/training that include opportunities to discuss real-world  
48 implementation of evidence with experienced colleagues and experts, with input from  
49 patients on delivery needs.  
50  
51  
52  
53  
54  
55  
56  
57  
58  
59  
60

1  
2  
3 While efforts were made to recruit participants for this research from multiple diverse  
4 sources, this study was not a representative sample. Most PwOA were in the 50–59-year  
5 age category with moderate joint pain. While prevalence of OA is higher in older age  
6 categories, the sample recruited is likely reflective of the online nature of participation, wide  
7 inclusion criteria (age 30+ years) and exclusion criteria for previous joint replacement  
8 surgery. Due to the timing of survey administration (during COVID-19 pandemic lockdown),  
9 traditional survey advertising methods such as GP and health clinic waiting rooms were not  
10 utilised. Completion of an anonymous survey has benefits as results cannot be influenced,  
11 however if there was any confusion related to phrasing of a certain question or statement,  
12 then this could not be clarified. The selection of other belief statements about exercise may  
13 have yielded different results. Future research should also investigate similar beliefs using  
14 qualitative approach to allow for more context to these answers.  
15  
16  
17  
18  
19  
20  
21

## 22 **Conclusion**

23 Beliefs of healthcare professionals and PwOA regarding exercise as a treatment for hip and  
24 knee OA have likely become more positive in recent years. However, there is still much  
25 scope for service improvement, with less than 50% of PwOA having seen a PT for their joint  
26 pain and all stakeholders in disagreement with statements relating to effectiveness of  
27 exercise for severe joint pain. Knowledge translation activities should be aimed at increasing  
28 knowledge and improving access to evidence-based exercise therapies, using stakeholder  
29 co-design to provide context on barriers and facilitators.  
30  
31  
32  
33  
34  
35  
36  
37  
38

39 **Contributorship Statement** - Toomey CM: Conceptualization, Methodology, Formal  
40 Analysis, Supervision, Writing – Original Draft. Higgins N: Methodology, Formal Analysis,  
41 Writing – Reviewing & Editing; Wood-Thornsbury A: Methodology, Formal Analysis, Writing  
42 – Reviewing & Editing; Rector J: Methodology, Formal Analysis, Writing – Reviewing &  
43 Editing; Bhardwaj A: Methodology, Writing – Review & Editing; Hayes P: Methodology,  
44 Writing – Review & Editing; Browne J: Methodology, Writing – Review & Editing; Grealis S:  
45 Methodology, Writing – Review & Editing; Maguire D: Methodology, Writing – Review &  
46 Editing; O’Hora J: Methodology, Writing – Review & Editing; Dowling I: Methodology, Writing  
47 – Review & Editing; Kennedy N: Conceptualization, Supervision, Writing – Review & Editing.  
48  
49  
50  
51  
52  
53

54 **Competing Interests** – none to declare.

55  
56 **Funding** - Funding for this project (IMPACT), salary of the PI (CMT) and student fees and  
57 stipend (AB) from Health Research Board (Ireland) Emerging Investigator Award, awarded  
58 to CMT (EIA-2019-008).  
59  
60

**Data Sharing Statement** - All data pertaining to this study is anonymous and can be shared upon reasonable request for secondary data analysis by contacting the PI (corresponding author).

**Acknowledgements** – We acknowledge the contributions of other members of the IMPACT Steering Committee who were involved in the interpretation of these results (Adrian Cassar-Gheiti, Helen French, Brenda Monaghan, Bronwen Maher and James Young).

**Figure 1.** Proportion of responses to guideline-based treatments people with osteoarthritis (n=97) have tried.

**Figure 2.** 100% stacked bar chart showing Likert scale results with count for each stakeholder on belief statements (a-d) related to exercise effectiveness. GP, general practitioner; PT, physiotherapist; PwOA, people with osteoarthritis.

**Figure 3.** 100% stacked bar chart showing Likert scale results with count for each stakeholder on belief statements (e-i) related to exercise safety and delivery. \*Questions for PwOA phrased slightly differently: “The best way to learn about exercise is in a supervised group setting with people who have similar pain” and “The best way to learn about exercise is in a one-on-one setting with a health professional”. GP, general practitioner; PT, physiotherapist; PwOA, people with osteoarthritis.

## REFERENCES

- 1 McAlindon TE, Bannuru RR, Sullivan MC, *et al.* OARSI guidelines for the non-surgical management of knee osteoarthritis. *Osteoarthr Cartil* 2014;**22**:363–88. doi:10.1016/j.joca.2014.01.003
- 2 National Institute for Health & Clinical Excellence. Osteoarthritis: care and management. London: 2014.
- 3 Hunter DJ. Osteoarthritis: time for us all to shift the needle. *Rheumatology* 2018;**57**:iv1–2. doi:10.1093/rheumatology/key065
- 4 Hagen REB, Smedslund G, Østeras N, *et al.* Quality of Community-Based Osteoarthritis Care : A Systematic Review and Meta-Analysis. *Arthritis Care Res* 2016;**68**:1443–52. doi:10.1002/acr.22891
- 5 Healey EL, Afolabi EK, Lewis M, *et al.* Uptake of the NICE osteoarthritis guidelines in primary care: a survey of older adults with joint pain. *BMC Musculoskelet Disord*

- 2018;**19**:295. doi:10.1186/s12891-018-2196-2
- 6 Briggs AM, Jordan JE, Kopansky-Giles D, *et al*. The need for adaptable global guidance in health systems strengthening for musculoskeletal health: a qualitative study of international key informants. *Glob Heal Res policy* 2021;**6**:24. doi:10.1186/s41256-021-00201-7
- 7 Geenen R, Overman CL, Christensen R, *et al*. EULAR recommendations for the health professional's approach to pain management in inflammatory arthritis and osteoarthritis. *Ann Rheum Dis* 2018;**77**:797–807. doi:10.1136/annrheumdis-2017-212662
- 8 Décary S, Toupin-April K, Légaré F, *et al*. Five Golden Rings to Measure Patient-Centered Care in Rheumatology. *Arthritis Care Res (Hoboken)* 2020;**72 Suppl 10**:686–702. doi:10.1002/acr.24244
- 9 Darlow B, Brown M, Thompson B, *et al*. Living with osteoarthritis is a balancing act: an exploration of patients' beliefs about knee pain. *BMC Rheumatol* 2018;**2**. doi:10.1186/s41927-018-0023-x BMC
- 10 Holden MA, Nicholls EE, Young J, *et al*. Role of Exercise for Knee Pain: What Do Older Adults in the Community Think? *Arthritis Care Res* 2012;**64**:1554–64. doi:10.1002/acr.21700
- 11 Bunzli S, Brien PO, Ayton D, *et al*. Misconceptions and the Acceptance of Evidence-based Nonsurgical Interventions for Knee Osteoarthritis. A Qualitative Study. *Clin Orthop Relat Res* 2019;**477**:1975–83. doi:10.1097/CORR.0000000000000784
- 12 Armitage CJ, Conner M. Social cognition models and health behaviour: A structured review. *Psychol Health* 2000;**15**:173–89. doi:10.1080/08870440008400299
- 13 Hurley M V, Walsh N, Bhavnani V, *et al*. Health beliefs before and after participation on an exercised-based rehabilitation programme for chronic knee pain: Doing is believing. *BMC Musculoskelet Disord* 2010;**11**:31. doi:10.1186/1471-2474-11-31
- 14 Holden MA, Nicholls EE, Young J, *et al*. UK-Based Physical Therapists' Attitudes and Beliefs Regarding Exercise and Knee Osteoarthritis: Findings From a Mixed-Methods Study. *Arthritis Care Res* 2009;**61**:1511–21. doi:10.1002/art.24829
- 15 Hunter DJ. Osteoarthritis Management: Time to Change the Deck. *J Orthop Sports Phys Ther* 2017;**47**:370–2. doi:10.2519/jospt.2017.0605
- 16 Briggs AM, Hinman RS, Darlow B, *et al*. Confidence and Attitudes Toward

- 1  
2  
3 Osteoarthritis Care Among the Current and Emerging Health Workforce: A  
4 Multinational Interprofessional Study. *ACR open Rheumatol* 2019;1:219–35.  
5 doi:10.1002/acr2.1032  
6  
7  
8  
9 17 Cottrell E, Foster NE, Porcheret M, *et al.* GPs' attitudes, beliefs and behaviours  
10 regarding exercise for chronic knee pain: a questionnaire survey. *BMJ Open* 2017;7.  
11 doi:10.1136/bmjopen-2016-014999  
12  
13  
14 18 MacKay C, Hawker GA, Jaglal SB. Qualitative study exploring the factors influencing  
15 physical therapy management of early knee osteoarthritis in Canada. *BMJ Open*  
16 2018;8. doi:10.1136/bmjopen-2018-023457  
17  
18  
19 19 Barker KL, Reid M, Minns Lowe CJ. What does the language we use about arthritis  
20 mean to people who have osteoarthritis? A qualitative study. *Disabil Rehabil*  
21 2014;36:367–72. doi:10.3109/09638288.2013.793409  
22  
23  
24  
25 20 Cottrell E, Roddy E, Foster N. The attitudes, beliefs and behaviours of GPs regarding  
26 exercise for chronic knee pain: a systematic review. *BMC Fam Pract*  
27 2010;11. <http://www.doaj.org/doaj?func=abstract&id=516161>  
28  
29  
30 21 Nissen N, Holm PM, Bricca A, *et al.* Clinicians' beliefs and attitudes to physical activity  
31 and exercise therapy as treatment for knee and/or hip osteoarthritis: a scoping  
32 review. *Osteoarthr Cartil* 2022;30:260–9. doi:10.1016/j.joca.2021.11.008  
33  
34  
35  
36 22 Barton CJ, Ezzat AM, Bell EC, *et al.* Knowledge, confidence and learning needs of  
37 physiotherapists treating persistent knee pain in Australia and Canada: a mixed-  
38 methods study. *Physiother Theory Pract* 2021;:1–13.  
39 doi:10.1080/09593985.2021.1906805  
40  
41  
42  
43 23 Toomey CM, Kennedy N, Macfarlane A, *et al.* Implementation of clinical guidelines for  
44 osteoarthritis together (IMPACT): protocol for a participatory health research  
45 approach to implementing high value care. *BMC Musculoskelet Disord* 2022;23.  
46 doi:10.1186/s12891-022-05599-w  
47  
48  
49  
50 24 Regan AO, Hayes P, Connor RO, *et al.* The University of Limerick Education and  
51 Research Network for General Practice ( ULEARN-GP ): practice characteristics and  
52 general practitioner perspectives. *BMC Fam Pract* 2020;21.  
53 doi:<https://doi.org/10.1186/s12875-020-1100-y>  
54  
55  
56  
57 25 Diamond IR, Grant RC, Feldman BM, *et al.* Defining consensus: a systematic review  
58 recommends methodologic criteria for reporting of Delphi studies. *J Clin Epidemiol*  
59 2014;67:401–9. doi:10.1016/j.jclinepi.2013.12.002  
60

- 1  
2  
3 26 Stubbs B, Hurley M, Smith T. What are the factors that influence physical activity  
4 participation in adults with knee and hip osteoarthritis? A systematic review of  
5 physical activity correlates. *Clin Rehabil* 2015;**29**:80–94.  
6  
7 doi:10.1177/0269215514538069  
8  
9
- 10 27 Rosemann T, Kuehlein T, Laux G, *et al.* Osteoarthritis of the knee and hip: a  
11 comparison of factors associated with physical activity. *Clin Rheumatol*  
12 2007;**26**:1811–7. doi:10.1007/s10067-007-0579-0  
13  
14
- 15 28 Juhl C, Christensen R, Roos EM, *et al.* Impact of Exercise Type and Dose on Pain  
16 and Disability in Knee Osteoarthritis A Systematic Review and Meta-Regression  
17 Analysis of Randomized Controlled Trials. *Arthritis Rheumatol* 2014;**66**:622–36.  
18 doi:10.1002/art.38290  
19  
20  
21
- 22 29 Susko AM, Fitzgerald GK. The pain-relieving qualities of exercise in knee  
23 osteoarthritis. *Open access Rheumatol Res Rev* 2013;**5**:81–91.  
24 doi:10.2147/OARRR.S53974  
25  
26  
27
- 28 30 Skou ST, Roos EM, Laursen MB, *et al.* A Randomized, Controlled Trial of Total Knee  
29 Replacement. *N Engl J Med* 2015;**373**:1597–606. doi:10.1056/NEJMoa1505467  
30  
31
- 32 31 Holden MA, Hattle M, Runhaar J, *et al.* Moderators of the effect of therapeutic  
33 exercise for knee and hip osteoarthritis : a systematic review and individual participant  
34 data meta-analysis. *Lancet Rheumatol* 2023;**5**:e386–400. doi:10.1016/S2665-  
35 9913(23)00122-4  
36  
37  
38
- 39 32 Hurley M, Dickson K, Hallett R, *et al.* Exercise interventions and patient beliefs for  
40 people with hip, knee or hip and knee osteoarthritis: a mixed methods review  
41 (Review). *Coch* 2018;:CD010842.  
42 doi:10.1002/14651858.CD010842.pub2.www.cochranelibrary.com  
43  
44  
45
- 46 33 Goh S-L, Persson MSM, Stocks J, *et al.* Relative Efficacy of Different Exercises for  
47 Pain, Function, Performance and Quality of Life in Knee and Hip Osteoarthritis:  
48 Systematic Review and Network Meta-Analysis. *Sports Med* 2019;**49**:743–61.  
49 doi:10.1007/s40279-019-01082-0  
50  
51  
52
- 53 34 Seguin R, Nelson ME. The benefits of strength training for older adults. *Am J Prev*  
54 *Med* 2003;**25**:141–9. doi:10.1016/s0749-3797(03)00177-6  
55  
56
- 57 35 Komatsu H, Yagasaki K, Saito Y, *et al.* Regular group exercise contributes to  
58 balanced health in older adults in Japan: a qualitative study. *BMC Geriatr*  
59 2017;**17**:190. doi:10.1186/s12877-017-0584-3  
60



- 1  
2  
3 36 Grønne DT, Roos EM, Ibsen R, *et al.* Cost-effectiveness of an 8- - week supervised  
4 education and exercise therapy programme for knee and hip osteoarthritis : a pre –  
5 post analysis of 16 255 patients participating in Good Life with osteoArthritis in  
6 Denmark (GLA:D). *BMJ Open* 2021;**11**. doi:10.1136/bmjopen-2021-049541  
7  
8  
9  
10 37 Mays AM, Kim S, Rosales K, *et al.* The Leveraging Exercise to Age in Place (LEAP)  
11 Study: Engaging Older Adults in Community-Based Exercise Classes to Impact  
12 Loneliness and Social Isolation. *Am J Geriatr psychiatry Off J Am Assoc Geriatr*  
13 *Psychiatry* 2021;**29**:777–88. doi:10.1016/j.jagp.2020.10.006  
14  
15  
16  
17 38 Gay C, Chabaud A, Guilley E, *et al.* Educating patients about the benefits of physical  
18 activity and exercise for their hip and knee osteoarthritis. Systematic literature review.  
19 *Ann Phys Rehabil Med* 2016;**59**:174–83.  
20 doi:https://doi.org/10.1016/j.rehab.2016.02.005  
21  
22  
23  
24 39 Goff AJ, Oliveira D De, Merolli M, *et al.* Patient education improves pain and function  
25 in people with knee osteoarthritis with better effects when combined with exercise  
26 therapy : a systematic review. *J Physiother* 2021;**67**:177–89.  
27 doi:10.1016/j.jphys.2021.06.011  
28  
29  
30  
31 40 Arthritis Ireland. Living Well with Arthritis (and Related Conditions) Self-Management  
32 Programme. Courses. 2023.https://www.arthritisireland.ie/living-well-with-arthritis-and-  
33 related-conditions-self-management-programme (accessed 22 Aug 2023).  
34  
35  
36  
37 41 Vos T, Lim SS, Abbafati C, *et al.* Global burden of 369 diseases and injuries in 204  
38 countries and territories, 1990-2019: a systematic analysis for the Global Burden of  
39 Disease Study 2019. *Lancet* 2020;**396**:1204–22. doi:10.1016/S0140-6736(20)30925-9  
40  
41  
42  
43 42 Prasanna SS, Korner-bitensky N, Ahmed S. Why Do People Delay Accessing Health  
44 Care for Knee Osteoarthritis ? Exploring Beliefs of Health Professionals and Lay  
45 People. *Physiother Canada* 2013;**65**:56–64. doi:10.3138/ptc.2011-50  
46  
47  
48  
49 43 Vennik J, Hughes S, Smith KA, *et al.* Patient and practitioner priorities and concerns  
50 about primary healthcare interactions for osteoarthritis: A meta-ethnography. *Patient*  
51 *Educ Couns* 2022;**105**:1865–77. doi:https://doi.org/10.1016/j.pec.2022.01.009  
52  
53  
54  
55 44 Bell OJ, Flynn D, Clifford T, *et al.* Identifying behavioural barriers and facilitators to  
56 engaging men in a community-based lifestyle intervention to improve physical and  
57 mental health and well-being. *Int J Behav Nutr Phys Act* 2023;**20**:25.  
58 doi:10.1186/s12966-023-01425-1  
59  
60  
61 45 Skou ST, Brødsgaard RH, Nyberg M, *et al.* Personalised exercise therapy and self-

1  
2  
3 management support for people with multimorbidity: feasibility of the MOBILIZE  
4 intervention. *Pilot Feasibility Stud* 2023;**9**:12. doi:10.1186/s40814-023-01242-0  
5  
6

- 7 46 Swaites L, Paskins Z, Finney A. Factors influencing the implementation of evidence-  
8 based guidelines for osteoarthritis in primary care : A systematic review and thematic  
9 synthesis. *Musculoskeletal Care* 2020;**18**:101–10. doi:10.1002/msc.1452  
10  
11  
12 47 Whiteley R, Napier C, van Dyk N, *et al*. Clinicians use courses and conversations to  
13 change practice, not journal articles: is it time for journals to peer-review courses to  
14 stay relevant? *Br J Sports Med* 2021;**55**:651 LP – 652. doi:10.1136/bjsports-2020-  
15 102736  
16  
17  
18  
19 48 Lineker SC, Bell MJ, Boyle J, *et al*. Implementing arthritis clinical practice guidelines in  
20 primary care. *Med Teach* 2009;**31**:230–7. doi:10.1080/01421590802158377  
21  
22  
23 49 Johansson M, Guyatt G, Montori V, *et al*. Guidelines should consider clinicians ' time  
24 needed to treat. *Br Med J* 2023;**380**. doi:10.1136/bmj-2022-072953  
25  
26  
27  
28  
29  
30  
31  
32  
33  
34  
35  
36  
37  
38  
39  
40  
41  
42  
43  
44  
45  
46  
47  
48  
49  
50  
51  
52  
53  
54  
55  
56  
57  
58  
59  
60

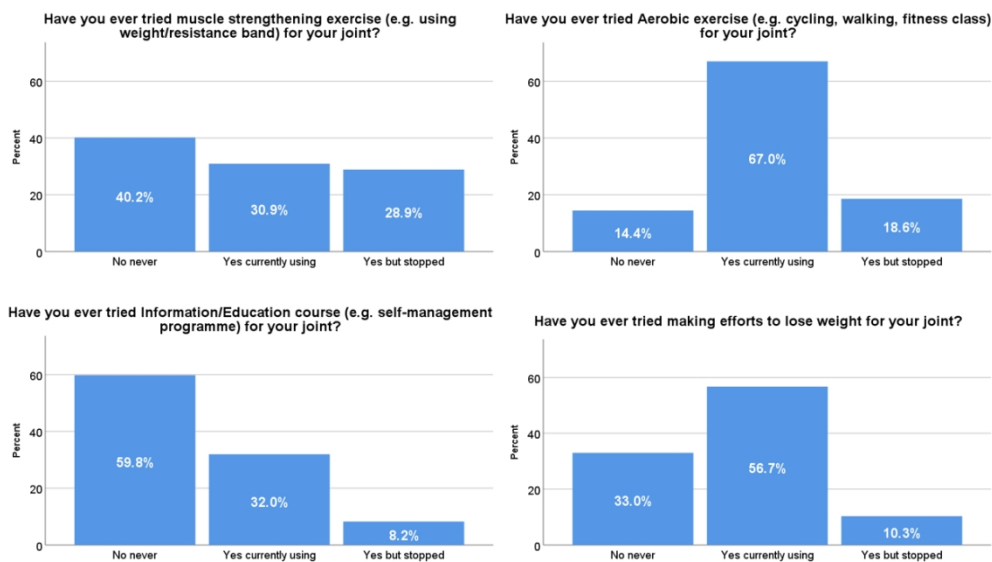

Figure 1. Proportion of responses to guideline-based treatments people with osteoarthritis (n=97) have tried.

680x385mm (47 x 47 DPI)

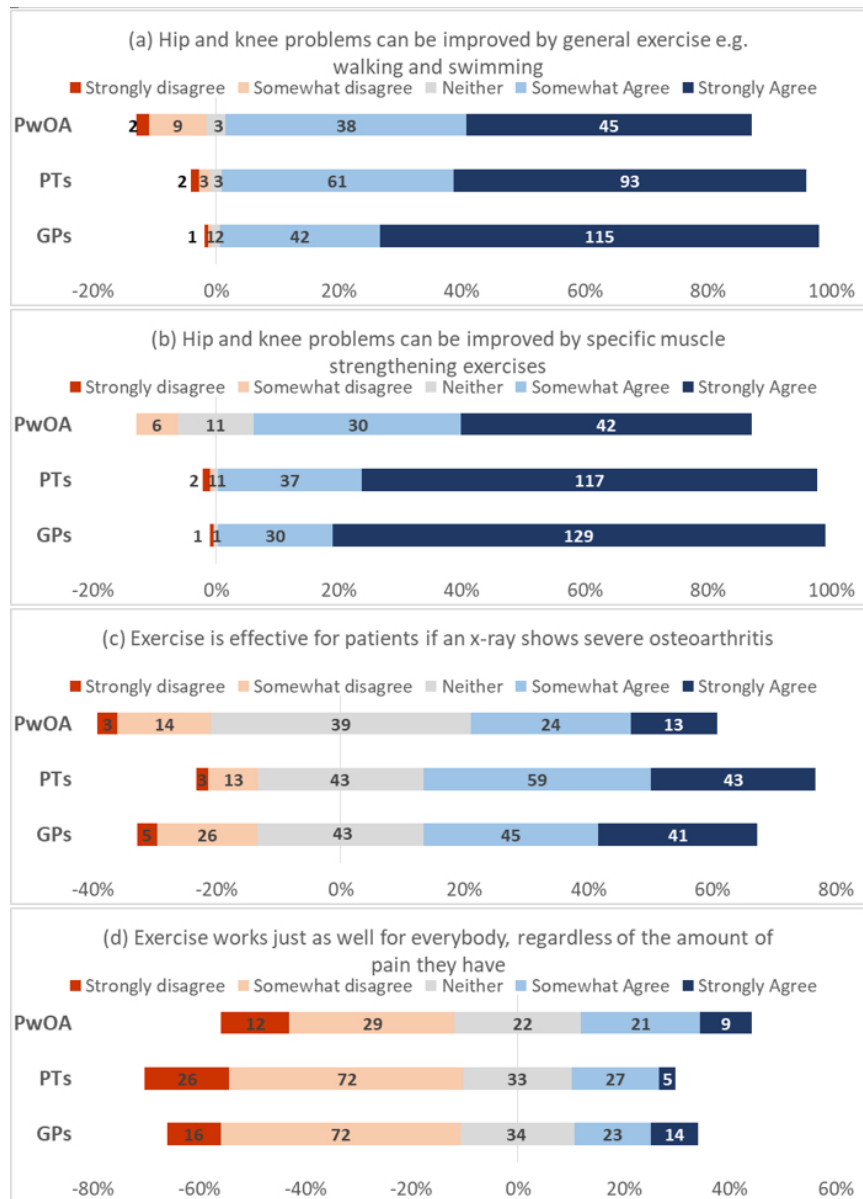

Figure 2. 100% stacked bar chart showing Likert scale results with count for each stakeholder on belief statements (a-d) related to exercise effectiveness. GP, general practitioner; PT, physiotherapist; PwOA, people with osteoarthritis.

377x526mm (47 x 47 DPI)

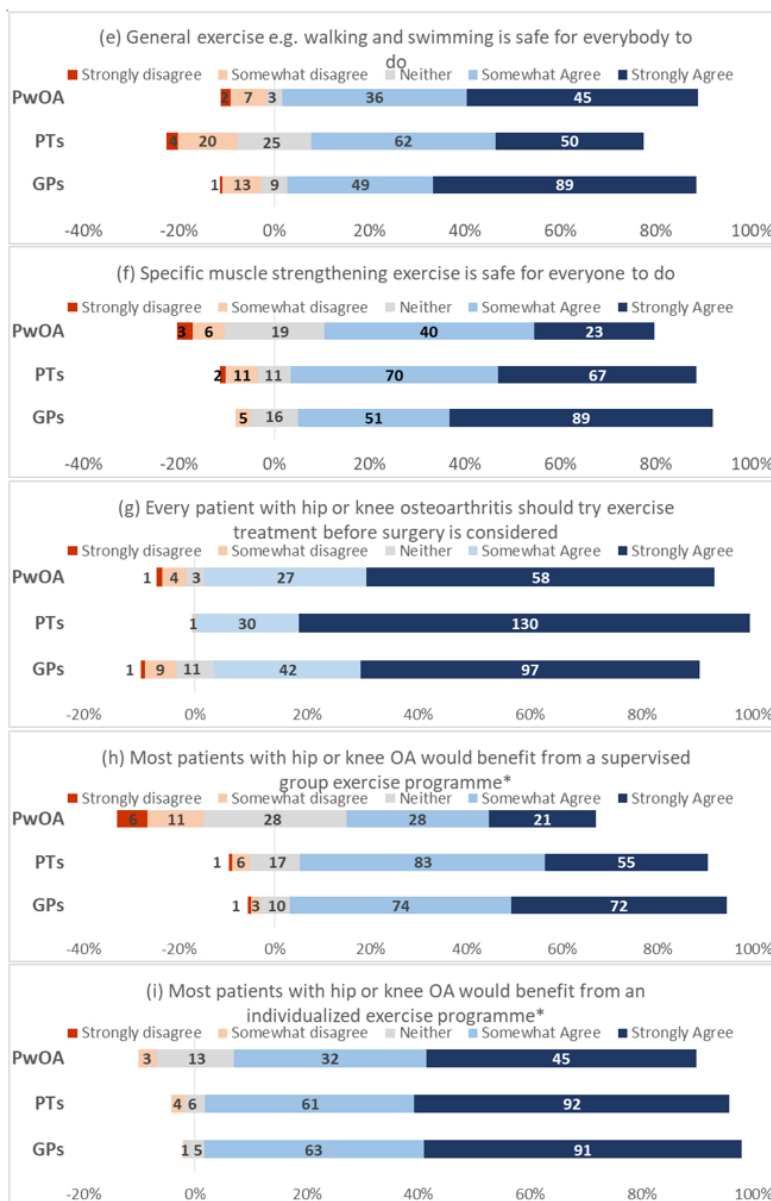

Figure 3. 100% stacked bar chart showing Likert scale results with count for each stakeholder on belief statements (e-i) related to exercise safety and delivery. \*Questions for PwOA phrased slightly differently: "The best way to learn about exercise is in a supervised group setting with people who have similar pain" and "The best way to learn about exercise is in a one-on-one setting with a health professional". GP, general practitioner; PT, physiotherapist; PwOA, people with osteoarthritis.

354x545mm (47 x 47 DPI)

**Supplemental File 1**

Guideline-based exercise management for hip and knee osteoarthritis: differences in healthcare professional and patient beliefs

## **Survey 1: Beliefs, Barriers and Enablers to Exercise Prescription for Hip and Knee Osteoarthritis in General Practice in Ireland**

Instructions for completing this questionnaire

- When completing the questionnaire, please try and provide answers that most accurately reflect your usual clinical practice. There are no 'correct' or 'incorrect' answers.
- Please do not consult any literature while completing this questionnaire.

### **Section 1. Information about you**

- How long have you been qualified as a General Practitioner?
  - Less than 5 years experience
  - 5-10 years experience
  - Greater than 10 years experience
- How many GP's work in your practice (including yourself)
- Are you:  Female  Male  Other  Prefer not to disclose
- Is your primary practice:  urban  rural  mixed
- Is your practice:
  - Primary care reimbursement scheme only
  - Private practice only
  - Mixed
- Since graduating from University, do you remember receiving any specific postgraduate training in musculoskeletal (MSK) which contained education about hip or knee osteoarthritis or chronic pain? (By this we do not mean clinical placements or jobs in rheumatology or orthopaedics)
  - Yes  No
  - If yes, what type of training?
    - CME small groups (or guest speaker)
    - Diploma in MSK
    - M.Sc. in Sports & Exercise Medicine
    - Sports Medicine Faculty conferences
    - Private Hospital Day Course
    - Therapeutic Intra Articular and Soft Tissue Injection and Assessment Course
    - Specific Modules on MSK on your GP training Scheme
    - Other \_\_\_\_\_
- How would you rate your confidence in treating hip and knee osteoarthritis?
  - Not confident
  - Slightly confident
  - Confident
  - Very confident
  - Extremely confident
- Do you have, or have you ever suffered from chronic knee or hip pain yourself?
  - Yes  No
- What percentage of your typical caseload is made up of patients with hip and/or knee pain?
  - 1-5%  6-25%  26-50%  51-75%  >75%

### **Section 2. Exercise beliefs for hip and knee osteoarthritis**

2.1 Where do you get your knowledge of care advancements for persons with knee or hip osteoarthritis? (Tick all that apply)

- Published guidelines or recommendations (e.g. NICE, EULAR, OARSI)
- Reading medical journals
- Twitter or other social media
- Podcasts
- CME networks or other GP networks
- Conference attendance
- Course attendance

**Supplemental File 1**

Guideline-based exercise management for hip and knee osteoarthritis: differences in healthcare professional and patient beliefs

Other \_\_\_\_\_

**We are interested in your views about the role of exercise in the treatment of hip and knee osteoarthritis. Please indicate the extent to which you agree or disagree with the statements given by ticking or placing an 'X' in one box per row.**

| Question                                                                                                                         | Strongly Disagree | Disagree | Neutral | Agree | Strongly Agree |
|----------------------------------------------------------------------------------------------------------------------------------|-------------------|----------|---------|-------|----------------|
| 2.2 Hip and knee problems are improved by general exercise e.g. walking and swimming                                             |                   |          |         |       |                |
| 2.3 Hip and knee problems are improved by specific muscle strengthening exercises                                                |                   |          |         |       |                |
| 2.4 General exercise e.g. walking and swimming is safe for everybody to do                                                       |                   |          |         |       |                |
| 2.5 Specific muscle strengthening exercise is safe for everyone to do                                                            |                   |          |         |       |                |
| 2.6 Every patient with hip or knee OA should try conservative exercise treatment before more invasive procedures are recommended |                   |          |         |       |                |
| 2.7 Exercise for hip or knee OA is most beneficial when it is tailored to meet individual patient needs                          |                   |          |         |       |                |
| 2.8 A standard set of exercises is sufficient for every patient with hip or knee OA                                              |                   |          |         |       |                |
| 2.9 Education on lifestyle change is important for patients with OA                                                              |                   |          |         |       |                |
| 2.10 Education on strategies for self-management of pain are important for patients with OA                                      |                   |          |         |       |                |
| 2.11 It is important that people with OA increase their overall activity levels                                                  |                   |          |         |       |                |
| 2.12 Exercise is effective for patients if an x-ray shows severe knee osteoarthritis                                             |                   |          |         |       |                |
| 2.13 Exercise for OA is more effectively provided by physiotherapists than GPs                                                   |                   |          |         |       |                |
| 2.14 Time constraints prevent the provision of advice on individual exercises for OA                                             |                   |          |         |       |                |
| 2.15 Exercise for OA should preferably be used after drug treatment has been tried                                               |                   |          |         |       |                |
| 2.16 Exercise for chronic knee pain would be used more frequently if access to physiotherapy was easier                          |                   |          |         |       |                |

**Section 3. Clinical scenario of a patient with osteoarthritis**

Presented below is a clinical scenario of a patient with suspected knee osteoarthritis who presents to you with this problem for the first time. All questions in this section relate to the care you would give this particular

**Patient:** Mrs. Murphy, 60-year old shop owner, no health insurance  
**Complaint:** Right sided knee pain  
**History:** Gradually worsening over 3 years  
 No history of trauma  
 Pain when walking and at rest, worst when climbing stairs.  
 No night pain.  
 Activities of daily living are manageable. Difficulty gardening.  
 Finding work increasingly difficult due to the stairs  
 Tried going to gym but stopped – thinks was making pain worse.  
 Otherwise well – mild hypertension  
 Has tried ibuprofen with no effect  
**Medication:** Amlodipine  
**Examination:** Mild Obesity with Body Mass Index of 33  
 Knees – bilaterally no effusions.  
 Joint line tenderness on palpation.  
 No pain or reduced mobility around knee cap  
 Slightly reduced flexion of the right knee.  
 Hips – no abnormality detected

patient.

**Supplemental File 1**

Guideline-based exercise management for hip and knee osteoarthritis: differences in healthcare professional and patient beliefs

3.1 Select some **key words** you would use to describe their diagnosis **to the patient**. (Select all that apply)

- |                                        |                                             |                                           |
|----------------------------------------|---------------------------------------------|-------------------------------------------|
| <input type="checkbox"/> Mild          | <input type="checkbox"/> Cartilage thinning | <input type="checkbox"/> Fear avoidance   |
| <input type="checkbox"/> Moderate      | <input type="checkbox"/> Overloading        | <input type="checkbox"/> Pain sensitivity |
| <input type="checkbox"/> Severe        | <input type="checkbox"/> Overweight         | <input type="checkbox"/> Bone on bone     |
| <input type="checkbox"/> Degeneration  | <input type="checkbox"/> Deterioration      | <input type="checkbox"/> Weakness         |
| <input type="checkbox"/> Wear and tear | <input type="checkbox"/> Normal ageing      | <input type="checkbox"/> Joint swelling   |
| <input type="checkbox"/> Arthritis     | <input type="checkbox"/> Joint damage       | Other _____                               |

3.2 What investigation(s)/assessment(s), if any, would you do/order for this patient at this point

- None    Knee x-ray    Blood tests    Other \_\_\_\_\_

3.3 At this consultation, what approaches would you use, or suggest, to manage this patient? (please tick all that apply)

- |                                                    |                                                   |                                                  |
|----------------------------------------------------|---------------------------------------------------|--------------------------------------------------|
| <input type="checkbox"/> None                      | <input type="checkbox"/> Advice on footwear       | <input type="checkbox"/> Exercise                |
| <input type="checkbox"/> Ice                       | <input type="checkbox"/> General activity         | <input type="checkbox"/> Injection of steroids   |
| <input type="checkbox"/> Heat                      | <input type="checkbox"/> Provision of walking aid | <input type="checkbox"/> Oral NSAID              |
| <input type="checkbox"/> Rest                      | <input type="checkbox"/> Weight Loss              | <input type="checkbox"/> Topical NSAID           |
| <input type="checkbox"/> Weak opioids              | <input type="checkbox"/> Paracetamol              | <input type="checkbox"/> Glucosamine/Chondroitin |
| <input type="checkbox"/> Other, please state _____ |                                                   |                                                  |

3.4 If you selected exercise above, what form would this take? (Select all that apply)

- Suggest general exercise and activity  
 Suggest specific exercises  
 Give a leaflet or online resource  
 Refer to physiotherapy or other exercise specialist  
 Other (please state) \_\_\_\_\_

3.5 In an ideal world without barriers, would you refer the patient to physiotherapy or orthopaedic consultant or neither, at this stage?

- Physiotherapy  
 Orthopaedic consultant  
 Neither

3.6 In your current practice, would you refer this patient to physiotherapy at this stage?

- Yes  
 No

If yes, why? (Select all that apply)

- Deemed an appropriate candidate for supervised conservative treatment  
 Ease of access to physiotherapy  
 Lack of time to appropriately address exercise needs in practice  
 Lack of response to NSAIDS  
 Other \_\_\_\_\_

If no, why not? (Select all that apply)

- Not an appropriate candidate for conservative treatment  
 Long waiting lists and poor access to physiotherapy  
 Other interventions are a priority  
 Exercise will make the pain worse  
 Patient has tried exercise  
 I would prefer to examine further therapeutic options first (e.g., develop a pain management plan or give an intra articular steroid injection)  
 Other \_\_\_\_\_

3.7 In your current practice, would you refer this patient to an orthopaedic consultant at this stage?

- Yes  
 No

If yes, why? (Select all that apply)

- Deemed an appropriate candidate for surgery right now



**Supplemental File 1**

Guideline-based exercise management for hip and knee osteoarthritis: differences in healthcare professional and patient beliefs

- Will likely need a joint replacement in a few years so put on waiting list now  
 Need a specialist opinion  
 Other \_\_\_\_\_

If no, why not? (Select all that apply)

- More conservative treatments have not been exhausted  
 Symptoms not severe enough to warrant joint replacement  
 Waiting list too long  
 Other \_\_\_\_\_

3.8 Would you refer the patient to see someone else, either in the primary or community team or into secondary care, at this point?

- Yes  
 No

If yes, who? \_\_\_\_\_

**Section 4. Barriers and enablers to exercise prescription and referral in general practice**

In your practice and experience of treating patients with osteoarthritis, what are the main barriers to exercise prescription or referral? (Please select all that apply)

- Insufficient time in consultation  
 Insufficient expertise  
 Uncertainty about the effects of exercise  
 Uncertainty about the most appropriate exercise type  
 Uncertainty about the safety of exercise  
 Cost and accessibility of physiotherapy for patient  
 Physiotherapy waiting lists are too long  
 Lack of a standardized physiotherapy programme for OA in the region  
 Patients prefer other management options  
 Patients want an orthopaedic consultant referral  
 English language barrier for patients  
 Severity of disease (symptoms too mild)  
 Severity of disease (symptoms too severe)  
 Older age of patient  
 Presence of many comorbidities  
 Other \_\_\_\_\_

What enablers would help you to prescribe or refer a patient with osteoarthritis to exercise in your practice?

- Increased formal post-qualification education e.g. diploma or masters  
 Increased post-qualification training e.g. workshops, videos  
 Increased exercise education during GP training  
 More consultation time to provide exercise prescription  
 Shorter waiting lists and improved access to physiotherapy  
 Presence of an evidence-based physiotherapy-supervised group exercise programme for osteoarthritis in the locality  
 Patients who recognize the importance of strategies for self-management of pain using appropriate exercise recommendations  
 Low cost community-based exercise programmes  
 Remuneration for exercise prescription and follow up consultations  
 Other \_\_\_\_\_

**Thank you for taking the time to complete this questionnaire. Your time and participation is greatly appreciated.**

**Supplemental File 1**

Guideline-based exercise management for hip and knee osteoarthritis: differences in healthcare professional and patient beliefs

## **Survey 2: Beliefs, Barriers and Enablers to Group Exercise Programme Delivery for Hip and Knee Osteoarthritis in Physiotherapy Practice in Ireland**

The questionnaire is divided into 3 sections and should take approximately **7 minutes** to complete.

Instructions for completing this questionnaire

- When completing the questionnaire, please try and provide answers that most accurately reflect your usual clinical practice. There are no 'correct' or 'incorrect' answers.
- Please do not consult any literature while completing this questionnaire.

**Section 1. Information about you**

- How long have you been qualified as a Physiotherapist?
  - Less than 5 years experience
  - 5-10 years experience
  - Greater than 10 years experience
- How many Physiotherapists work in your clinic (including yourself) \_\_\_\_\_
- Are you:  Female  Male  Other  Prefer not to disclose
- Is your primary work setting:
  - Public hospital
  - Private hospital
  - Primary, community and continuing care
  - Private practice clinic
  - Education
  - Other (please state) \_\_\_\_\_
- Have you undertaken any specific post-qualification training, which involved education about hip or knee osteoarthritis or chronic pain? (By this we do not mean clinical placements or jobs in rheumatology or orthopaedics)  Yes  No
 

If yes, what type of training? (Provide additional details if you wish to expand)

  - In-service training Additional details \_\_\_\_\_
  - M.Sc. (taught) in this/similar field Additional details \_\_\_\_\_
  - M.Sc. (research) in this/similar field Additional details \_\_\_\_\_
  - PhD in this/similar field Additional details \_\_\_\_\_
  - Day, weekend or online course (please name most relevant) \_\_\_\_\_
  - Other \_\_\_\_\_
- How would you rate your confidence in treating hip and knee osteoarthritis?
  - Not confident
  - Slightly confident
  - Confident
  - Very confident
  - Extremely confident
- Do you have, or have you ever suffered from chronic knee or hip pain yourself?  Yes  No
- What percentage of your typical caseload is made up of patients with hip and/or knee osteoarthritis?
  - 1-5%  6-25%  26-50%  51-75%  >75%

**Section 2. Exercise beliefs for hip and knee osteoarthritis**

2.1 Where do you access your knowledge of management for persons with knee or hip osteoarthritis? (Tick all that apply)

- Published guidelines or recommendations (e.g. NICE, EULAR, OARSI)
- Clinic protocols, discussion with peers or in-services
- Reading published research articles
- Twitter or other social media
- Podcasts
- Blogs
- Infographics
- Videos
- ISCP specialist groups and other network events
- Conference attendance
- Course attendance

**Supplemental File 1**

Guideline-based exercise management for hip and knee osteoarthritis: differences in healthcare professional and patient beliefs

Other \_\_\_\_\_

Please now rank in order your preferred resources to learn from

**We are interested in your views about the role of exercise in the treatment of hip and knee osteoarthritis. Please indicate the extent to which you agree or disagree with the statements given by ticking one box per row.**

| Question                                                                                                           | Strongly Disagree | Disagree | Neutral | Agree | Strongly Agree |
|--------------------------------------------------------------------------------------------------------------------|-------------------|----------|---------|-------|----------------|
| 2.2 Hip and knee problems are improved by general exercise e.g. walking and swimming                               |                   |          |         |       |                |
| 2.3 Hip and knee problems are improved by specific muscle strengthening exercises                                  |                   |          |         |       |                |
| 2.4 Hip and knee problems are improved by focusing on motor or neuromuscular control of the joints during exercise |                   |          |         |       |                |
| 2.5 General exercise e.g. walking and swimming is safe for most patients to do                                     |                   |          |         |       |                |
| 2.6 Specific muscle strengthening exercise is safe for most patients to do                                         |                   |          |         |       |                |
| 2.7 Neuromuscular control exercises are safe for most patients to do                                               |                   |          |         |       |                |
| 2.8 Every patient with hip or knee OA should try conservative exercise treatment before surgery is considered      |                   |          |         |       |                |
| 2.9 Exercise for hip or knee OA is most beneficial when it is tailored to meet individual patient needs            |                   |          |         |       |                |
| 2.10 A standard set of exercises with individual progression is sufficient for every patient with hip or knee OA   |                   |          |         |       |                |
| 2.11 Education on lifestyle change is important for patients with OA                                               |                   |          |         |       |                |
| 2.12 Education on strategies for self-management of pain are important for patients with OA                        |                   |          |         |       |                |
| 2.13 It is important that people with OA increase their overall activity levels                                    |                   |          |         |       |                |
| 2.14 Exercise is effective for patients if an x-ray shows severe knee osteoarthritis                               |                   |          |         |       |                |
| 2.15 Most patients with hip or knee OA would benefit from a supervised group exercise programme                    |                   |          |         |       |                |
| 2.16 Most patients with hip or knee OA would benefit from an individualized exercise programme                     |                   |          |         |       |                |

**Section 3. Barriers and enablers to exercise programme delivery in physiotherapy practice**

3.1 Please select the current level of government COVID19 restrictions in place as you are completing this survey

Level 1       Level 2       Level 3       Level 4       Level 5

3.2 **Pre-COVID19** restrictions in March 2020, were you or your clinic providing **group exercise classes** for patients with hip or knee osteoarthritis?  Yes  No

If Yes, what was the average number of classes per week? \_\_\_\_\_

If No, were you interested in offering group exercise classes for osteoarthritis in an ideal world and **if no barriers** existed?

Yes

No

**Supplemental File 1**

Guideline-based exercise management for hip and knee osteoarthritis: differences in healthcare professional and patient beliefs

3.3 **Pre-COVID19** restrictions in March 2020, **what** were the main **barriers** to providing group exercise programmes for patients with osteoarthritis in your practice? (Please select all that apply)

- None
- Insufficient space and equipment resources
- Insufficient personnel (staff) resources
- Insufficient referrals or low OA caseload
- Patients want individualized programmes
- Patients prefer other management options e.g. manual therapy
- Insufficient expertise
- Uncertainty about the effects of exercise
- Uncertainty about the most appropriate exercise type
- Uncertainty about the safety of exercise
- Cost for patient
- Access for patient (e.g. travel, parking, time)
- Scheduling conflict related to patient working hours and clinic hours
- Lack of a standardised programme or protocol for exercise for OA
- English language barrier for patients
- Lack of support from colleagues or managers
- Other \_\_\_\_\_

3.4 Are you currently offering **group exercise classes** for patients with hip or knee osteoarthritis and **to what capacity**?

- Yes, face to face at full capacity
- Yes, face to face at reduced capacity compared to Pre-COVID19 restrictions
- Yes, online classes only
- Yes, combination of face-to-face and online
- No

3.5 **Under current restrictions**, are there any **additional barriers** to providing **face-to-face** group exercise programmes for patients with osteoarthritis in your practice? (Please select all that apply)

- None
- Government restrictions currently do not allow for group classes
- Hospital or clinic protocols currently do not allow for group classes
- Patients do not want to attend clinic
- Not enough resources for adequate distancing for class members
- Sanitization procedures are too time consuming
- Own COVID-related safety concerns
- Other \_\_\_\_\_

3.6 **Under current restrictions**, are there any **additional barriers** to providing **online** group exercise programmes for patients with osteoarthritis in your practice? (Please select all that apply)

- None
- Lack of IT resources in clinic (e.g. online platform, webcams, high speed Wi-Fi)
- Lack of personnel (staff) with IT knowledge
- Patients lack IT resources or knowledge
- Patients prefer to wait until they can access face-to-face treatment
- Uncertainty about the effectiveness of online group exercise
- Own personal preference
- Other \_\_\_\_\_

3.7 What **enablers** would help you to provide **face to face group exercise** classes to patients with osteoarthritis in your practice if COVID restrictions were not a factor? (Please select all that apply)

- None
- More university post-qualification education e.g. diploma or masters
- More other post-qualification training e.g. short courses, workshops, videos
- More education on group exercise delivery during physiotherapy training
- Appropriate referrals from GP or other sources
- GPs who impart knowledge regarding benefits of exercise to patients upon referral

**Supplemental File 1**

Guideline-based exercise management for hip and knee osteoarthritis: differences in healthcare professional and patient beliefs

- Resources to deliver quality educational material regarding self-management alongside exercise
- More support from colleagues or managers
- Other \_\_\_\_\_

3.8 What **enablers** would help you to provide an option of **online** group exercise classes to patients with osteoarthritis in your practice? (Please select all that apply)

- None
- Improved IT infrastructure in clinic (e.g. laptops, webcams)
- IT skills resources for delivering online programmes (e.g. tutorials, do's and don'ts)
- Access to IT resources (e.g. tutorials) to provide patients with
- Improved Wi-Fi and bandwidth nationwide
- Strong evidence for effectiveness of existing online programmes
- An online registry allowing collection of patient outcomes pre- and post- programme
- Other \_\_\_\_\_

3.9 Would you be interested in receiving **training** (1.5 day workshop) to effectively implement and deliver a standardized, international, evidence-based group exercise and education programme with online and face-to-face options for patients with osteoarthritis in your clinic?

- Extremely interested
- Very interested
- Moderately interested
- Slightly interested
- Not at all interested

If not interested, why? \_\_\_\_\_

3.10 If interested, how much would you be willing to pay for this continuous professional development training?

- €100-150
- €151-200
- €201-250
- €251-300
- €301-350
- More than €350
- N/A

**Thank you for taking the time to complete this questionnaire. Your time and participation is greatly appreciated.**

**Supplemental File 1**

Guideline-based exercise management for hip and knee osteoarthritis: differences in healthcare professional and patient beliefs

**Survey 3: Survey on the Role of Exercise for Hip and Knee Osteoarthritis in Adults in Ireland**

The questions below are divided into 3 sections. Please complete the questions to the best of your ability.

**Section 1. Information about you**

1. Are you:  Female  Male  Other  Prefer not to disclose
2. Which age category do you fall into?
  - 30 to 39 years
  - 40 to 49 years
  - 50 to 59 years
  - 60 to 69 years
  - 70 to 79 years
  - 80 to 89 years
  - 90 years or older
3. Which province in Ireland do you reside in?  Munster  Ulster  Connacht  Leinster  
**\*\*If "Ulster" is selected, question 3(b) will appear.**  
 3(b) Do you access your healthcare in:
  - Northern Ireland (NHS)
  - Republic of Ireland (HSE)
  - A combination of both
4. Which of the following best describes where you live?
  - Inner city
  - Suburb of a city
  - Town
  - Village
  - Open country
  - Island off Ireland
5. Have you ever been told by a health professional that you have a diagnosis of the following?(Select all that apply)
 

|                                                                   |                                                                     |
|-------------------------------------------------------------------|---------------------------------------------------------------------|
| <input type="checkbox"/> Arthritis                                | <input type="checkbox"/> Diabetes Mellitus (type 1 or 2)            |
| <input type="checkbox"/> Osteoarthritis                           | <input type="checkbox"/> Kidney or liver disease                    |
| <input type="checkbox"/> Wear and tear                            | <input type="checkbox"/> Anemia (reduced number of red blood cells) |
| <input type="checkbox"/> Degenerative changes                     | <input type="checkbox"/> Other blood disease                        |
| <input type="checkbox"/> Rheumatoid arthritis                     | <input type="checkbox"/> Cancer                                     |
| <input type="checkbox"/> Hypertension                             | <input type="checkbox"/> Depression                                 |
| <input type="checkbox"/> Heart Disease                            | <input type="checkbox"/> Anxiety                                    |
| <input type="checkbox"/> Ulcer or other bowel diseases            | <input type="checkbox"/> Other mental health disorder               |
| <input type="checkbox"/> Neurological disease e.g. Parkinson's/MS |                                                                     |
| <input type="checkbox"/> Respiratory diseases e.g. COPD           | <input type="checkbox"/> Thyroid Disease                            |
| <input type="checkbox"/> Hemochromatosis                          | <input type="checkbox"/> Fibromyalgia                               |
| <input type="checkbox"/> Other health condition _____             |                                                                     |
6. Have you had pain and joint symptoms in any of the following joints for **6 months or more** (select all that apply)
 

|                                             |                                                       |
|---------------------------------------------|-------------------------------------------------------|
| <input type="checkbox"/> Right Knee         | <input type="checkbox"/> Left Knee                    |
| <input type="checkbox"/> Right Hip          | <input type="checkbox"/> Left Hip                     |
| <input type="checkbox"/> Right Ankle        | <input type="checkbox"/> Left Ankle                   |
| <input type="checkbox"/> Right Shoulder     | <input type="checkbox"/> Left Shoulder                |
| <input type="checkbox"/> Right Elbow        | <input type="checkbox"/> Left Elbow                   |
| <input type="checkbox"/> Right Wrist        | <input type="checkbox"/> Left Wrist                   |
| <input type="checkbox"/> Right Hand/Fingers | <input type="checkbox"/> Left Hand/Fingers            |
| <input type="checkbox"/> Lower Back         | <input type="checkbox"/> Other, please describe _____ |
| <input type="checkbox"/> Mid Back           |                                                       |
| <input type="checkbox"/> Neck               |                                                       |
7. Have you ever had joint replacement surgery for any of your painful joints? Please select below the joints that have been replaced.
 

|                                         |                                        |
|-----------------------------------------|----------------------------------------|
| <input type="checkbox"/> Right Knee     | <input type="checkbox"/> Left Knee     |
| <input type="checkbox"/> Right Hip      | <input type="checkbox"/> Left Hip      |
| <input type="checkbox"/> Right Ankle    | <input type="checkbox"/> Left Ankle    |
| <input type="checkbox"/> Right Shoulder | <input type="checkbox"/> Left Shoulder |

**Supplemental File 1**

Guideline-based exercise management for hip and knee osteoarthritis: differences in healthcare professional and patient beliefs

- Right Elbow                       Left Elbow  
 Right Wrist                       Left Wrist  
 Right Hand/Fingers               Left Hand/Fingers  
 Other, please describe \_\_\_\_\_

8. Of your hip and/or knee joints that have **NOT** been replaced, which joint are you most bothered by? (select one)

- Right Knee                       Left Knee  
 Right Hip                       Left Hip

**All remaining questions will now be related to the joint that you have chosen.**

9. How long have you been experiencing pain in your [insert chosen joint]?

- 6 months – 1 year  
 1 – 2 years  
 2 – 3 years  
 3 – 4 years  
 4 – 5 years  
 More than 5 years

10. Have you seen or spoken to your GP about your painful [insert chosen joint]?  Yes  No

11. Have you ever had an x-ray of your [insert chosen joint]?  Yes  No

12. Has your GP ever referred you to an **orthopaedic consultant** for your [insert chosen joint]?

- Yes  
 No  
 Currently on a waiting list (private consultant referral)  
 Currently on a waiting list (public consultant referral)

\*\* If on a waiting list, how long have you been waiting?

- Less than 6 months  
 6 months – 1 year  
 1 year – 1.5 years  
 1.5 years – 2 years  
 More than 2 years

13. Has your GP ever referred you to a **physiotherapist** for your [insert chosen joint]?

- Yes  
 No  
 Currently on a waiting list (private consultant referral)  
 Currently on a waiting list (public consultant referral)

\* If on a waiting list, how long have you been waiting?

- Less than 6 months  
 6 months – 1 year  
 1 year – 1.5 years  
 1.5 years – 2 years  
 More than 2 years

14. How would you rate the pain and symptoms you are experiencing in your hip and/or knee on an average day?

- No pain or symptoms  
 Mild pain and symptoms  
 Moderate pain and symptoms  
 Severe pain and symptoms

15. Have you EVER tried any of the following specifically for your [insert chosen joint]?

Muscle strengthening exercise

(e.g. using weight/resistance band)  No, never                       Yes, currently using                       Yes, stopped using

Aerobic exercise

(e.g. cycling, walking, fitness class)  No, never                       Yes, currently using                       Yes, stopped using

Information/Education course

(e.g. self-management programme)  No, never                       Yes, currently using                       Yes, stopped using

Making efforts to lose weight                       No, never                       Yes, currently using                       Yes, stopped using

**Supplemental File 1**

Guideline-based exercise management for hip and knee osteoarthritis: differences in healthcare professional and patient beliefs

**Section 2. Exercise beliefs for hip and knee osteoarthritis**

We are interested in your views about the role of exercise in the treatment of hip and knee osteoarthritis.

Please indicate how much you agree or disagree with the statements given by selecting one option per question.

| Question                                                                                                                                | Strongly Disagree | Disagree | Neutral | Agree | Strongly Agree |
|-----------------------------------------------------------------------------------------------------------------------------------------|-------------------|----------|---------|-------|----------------|
| 2.1 Hip and knee problems can be improved by general exercise e.g. walking and swimming                                                 |                   |          |         |       |                |
| 2.2 Hip and knee problems can be improved by specific muscle strengthening exercises                                                    |                   |          |         |       |                |
| 2.3 General exercise e.g. walking and swimming is safe for everybody to do                                                              |                   |          |         |       |                |
| 2.4 Specific muscle strengthening exercise is safe for everyone to do                                                                   |                   |          |         |       |                |
| 2.5 Every patient with hip or knee osteoarthritis should try exercise treatment before surgery is considered                            |                   |          |         |       |                |
| 2.6 Patients should learn more about how to self-manage their pain and symptoms using exercise and physical activity                    |                   |          |         |       |                |
| 2.7 The best way to learn about exercise is in a supervised group setting with people who have similar pain (Pre-COVID-19 restrictions) |                   |          |         |       |                |
| 2.8 The best way to learn about exercise is in a one-on-one setting with a health professional (Pre-COVID-19 restrictions)              |                   |          |         |       |                |
| 2.9 Exercise is effective for patients if an x-ray shows severe knee osteoarthritis                                                     |                   |          |         |       |                |
| 2.10 Exercise works just as well for everybody, regardless of the amount of pain they have                                              |                   |          |         |       |                |

**Section 3. Barriers and enablers to exercise for hip and knee osteoarthritis**

In this section we want to know more about your exercise experience and what kinds of things would prevent you or help you do more exercise

3.1 How many times a week do you exercise (e.g. 30 minute walk)?

- 3 or more days per week  
 Less than 3 days per week  
 I don't exercise

3.2 Has a health professional ever given you specific exercises for your [insert chosen joint]?

- Yes  
 No  
 Not sure

\*If Yes, what type of health professional? (select all that apply)

- Physiotherapist  
 GP  
 Orthopaedic surgeon  
 Nurse  
 Personal trainer  
 Other, please name \_\_\_\_\_

\*If Yes, what type of exercise?

- Home-based individual exercises  
 Group exercise class for osteoarthritis  
 Other, please state \_\_\_\_\_

\*If Yes, did you find the exercise beneficial?

- Yes  
 No  
 Not sure

3.3 Please select the current level of government COVID19 restrictions in place as you are completing this survey



**Supplemental File 1**

Guideline-based exercise management for hip and knee osteoarthritis: differences in healthcare professional and patient beliefs

Level 1       Level 2       Level 3       Level 4       Level 5 (strictest restrictions)

3.4 Thinking about life **without COVID19** restrictions, **what** are the main **barriers** that would prevent you from exercising? (Please select all that apply)

- Pain or other joint symptoms
- I need assistance for mobility e.g. walking stick, wheelchair
- Finding time to exercise
- Lack of enjoyment from exercise
- Lack of exercise buddy or support network
- Wet or cold weather
- Other health problems
- Other disability e.g. visual impairment
- Cost of a gym membership or physiotherapy visit
- Cost of active wear or equipment
- I don't know the best types of exercise to do
- I don't know who to contact to learn more or do more exercise
- Uncertainty about the safety of exercise for joint pain
- Uncertainty about the benefit of exercise for joint pain
- Negative body image
- Access to facilities (e.g. availability, travel, parking)
- Work commitments
- Family commitments or other responsibilities
- Age
- Fear of injury
- Tiredness and fatigue
- Depression
- Other \_\_\_\_\_

3.5 Thinking about life **without COVID19** restrictions, what types of things would **help you to exercise more?** (Please select all that apply)

- Better knowledge of the best type of exercise to do
- Access to exercise that is supervised by a health professional
- Social aspect e.g. group exercise with other people with hip or knee pain
- More confidence in your joint
- Exercise recommendations from a GP
- Exercise recommendations from a physiotherapist
- More support from family or friends
- Warm and dry weather for outdoor exercise
- Low cost community exercise programmes
- Safe exercise environment (e.g. well-lit pathways)
- Other \_\_\_\_\_

3.6 Thinking about life **without COVID-19**, how interested would you be in attending a 6-week, twice per week, physiotherapy-supervised group exercise and education class for your hip or knee pain **at a clinic or community centre?**

- Extremely interested
  - Very interested
  - Moderately interested
  - Slightly interested
  - Not at all interested
- If not interested, why? \_\_\_\_\_

3.7 Thinking about **current restrictions**, how interested would you be in taking part in a 6-week, twice per week, **ONLINE** physiotherapy-supervised group exercise and education class for you hip or knee pain?

- Extremely interested
- Very interested
- Moderately interested
- Slightly interested

**Supplemental File 1**

Guideline-based exercise management for hip and knee osteoarthritis: differences in healthcare professional and patient beliefs

Not at all interested

If not interested, why? \_\_\_\_\_

3.8 Do you have any experience with online-delivered healthcare or telerehabilitation from a GP or other health professional?

Yes

No

3.9 What are the **barriers** that would prevent you taking part in an **online exercise** class? (Please select all that apply)

Lack of technology equipment (e.g. laptop, smartphone or tablet, webcams)

Lack of confidence in using computers, laptops etc.

Wi-Fi / Broadband connection is not good enough

Preference to wait until I can access face-to-face treatment

Uncertain about how online group exercise would work

Lack of space in home environment to perform exercises

English language barriers

Lack of time to take part

Other \_\_\_\_\_

3.10 What would **help you** to take part in an **online** group exercise class with other people with osteoarthritis? (Please select all that apply)

An initial one-to-one session with a physiotherapist to get familiar with the process

Resources (e.g. videos) with explanations of how to get started

Improved Wi-Fi and bandwidth

Examples and testimonials from patients who have finished the classes

Opportunities to chat online with other patients before and after the class

Support from family members to get set up in your home

A laptop or tablet

Other \_\_\_\_\_

3.11 If interested, how much would you be willing to pay to take part in these exercise classes (price in euros for entire 14-15 session programme)?

€0-25

€26-50

€51-100

€101-150

€151-200

> €200

**Thank you for taking the time to complete this questionnaire. Your time and participation is greatly appreciated.**

**Supplemental File 2**

Guideline-based exercise management for hip and knee osteoarthritis: differences in healthcare professional and patient beliefs

**Supplemental Table:** Multivariable linear regression models to determine if positive beliefs about exercise in PwOA are associated with (1) referral to physiotherapist by a GP and (2) if they have seen a physiotherapist for their joint pain.

| <i>Dependent Variable: Number of exercise belief statements agreed with</i>       |          |             |                                |            |             |               |                              |              |
|-----------------------------------------------------------------------------------|----------|-------------|--------------------------------|------------|-------------|---------------|------------------------------|--------------|
| <b>Variables<br/>Model 1<sup>a</sup></b>                                          | <b>B</b> | <b>S.E.</b> | <b>Partial<br/>Correlation</b> | <b>VIF</b> | <b>Sig.</b> | <b>Exp(B)</b> | <b>95% CI for<br/>EXP(B)</b> |              |
|                                                                                   |          |             |                                |            |             |               | <b>Lower</b>                 | <b>Upper</b> |
| <i>Has your GP ever referred you to a physiotherapist for your painful joint?</i> | 0.457    | 0.406       | 0.129                          | 1.01       | 0.264       | 0.120         | -0.352                       | 1.267        |
| <i>Sex</i>                                                                        | -1.011   | 0.502       | -0.227                         | 1.009      | 0.048       | -0.215        | -2.011                       | -0.011       |
| <i>Number of comorbidities</i>                                                    | -0.361   | 0.128       | 0.309                          | 1.009      | 0.006       | -0.300        | -0.616                       | -0.106       |
| <i>Constant</i>                                                                   | 7.772    | 0.686       | -                              | -          | 0.000       | -             | 6.405                        | 9.138        |
| <b>Model 2<sup>b</sup></b>                                                        |          |             |                                |            |             |               |                              |              |
| <i>Have you seen a physiotherapist for your painful joint?</i>                    | 1.060    | 0.383       | 0.288                          | 1.138      | 0.007       | 0.287         | 0.299                        | 1.821        |
| <i>Sex</i>                                                                        | -0.723   | 0.362       | -0.212                         | 1.003      | 0.049       | -0.194        | -1.444                       | -0.003       |
| <i>How long have you been experiencing pain in your joint?</i>                    | -0.204   | 0.099       | -0.219                         | 1.163      | 0.042       | -0.216        | -0.400                       | -0.008       |
| <i>Number of comorbidities</i>                                                    | -0.293   | 0.119       | -0.257                         | 1.026      | 0.016       | -0.241        | -0.530                       | -0.055       |
| <i>Constant</i>                                                                   | 7.680    | 0.585       | -                              | -          | 0.000       | -             | 6.034                        | 9.653        |

<sup>a</sup>Model variables removed due to non-significance (1): *How long have you been experiencing pain in your joint?*, *How would you rate the pain and symptoms you are experiencing in your hip and/or knee on an average day?*.

<sup>b</sup>Model variables removed due to non-significance (2): *How would you rate the pain and symptoms you are experiencing in your hip and/or knee on an average day?*. B, beta coefficient; GP, general practitioner; OA, osteoarthritis; PT, physiotherapist; PwOA, people with osteoarthritis; S.E., standard error; VIF, variance inflation factor.

STROBE Statement—Checklist of items that should be included in reports of *cross-sectional studies*

|                              | Item No | Recommendation                                                                                                                                                                                    | Page No |
|------------------------------|---------|---------------------------------------------------------------------------------------------------------------------------------------------------------------------------------------------------|---------|
| <b>Title and abstract</b>    | 1       | (a) Indicate the study's design with a commonly used term in the title or the abstract                                                                                                            | 1       |
|                              |         | (b) Provide in the abstract an informative and balanced summary of what was done and what was found                                                                                               | 1       |
| <b>Introduction</b>          |         |                                                                                                                                                                                                   |         |
| Background/rationale         | 2       | Explain the scientific background and rationale for the investigation being reported                                                                                                              | 3-4     |
| Objectives                   | 3       | State specific objectives, including any prespecified hypotheses                                                                                                                                  | 4       |
| <b>Methods</b>               |         |                                                                                                                                                                                                   |         |
| Study design                 | 4       | Present key elements of study design early in the paper                                                                                                                                           | 4-5     |
| Setting                      | 5       | Describe the setting, locations, and relevant dates, including periods of recruitment, exposure, follow-up, and data collection                                                                   | 4-5     |
| Participants                 | 6       | (a) Give the eligibility criteria, and the sources and methods of selection of participants                                                                                                       | 5       |
| Variables                    | 7       | Clearly define all outcomes, exposures, predictors, potential confounders, and effect modifiers. Give diagnostic criteria, if applicable                                                          | 5-6     |
| Data sources/<br>measurement | 8*      | For each variable of interest, give sources of data and details of methods of assessment (measurement). Describe comparability of assessment methods if there is more than one group              | 5-7     |
| Bias                         | 9       | Describe any efforts to address potential sources of bias                                                                                                                                         | n/a     |
| Study size                   | 10      | Explain how the study size was arrived at                                                                                                                                                         | n/a     |
| Quantitative variables       | 11      | Explain how quantitative variables were handled in the analyses. If applicable, describe which groupings were chosen and why                                                                      | 5-6     |
| Statistical methods          | 12      | (a) Describe all statistical methods, including those used to control for confounding                                                                                                             | 6-7     |
|                              |         | (b) Describe any methods used to examine subgroups and interactions                                                                                                                               | 6-7     |
|                              |         | (c) Explain how missing data were addressed                                                                                                                                                       | 7       |
|                              |         | (d) If applicable, describe analytical methods taking account of sampling strategy                                                                                                                | 6-7     |
|                              |         | (e) Describe any sensitivity analyses                                                                                                                                                             | n/a     |
| <b>Results</b>               |         |                                                                                                                                                                                                   |         |
| Participants                 | 13*     | (a) Report numbers of individuals at each stage of study—eg numbers potentially eligible, examined for eligibility, confirmed eligible, included in the study, completing follow-up, and analysed | 7       |
|                              |         | (b) Give reasons for non-participation at each stage                                                                                                                                              | 7       |
|                              |         | (c) Consider use of a flow diagram                                                                                                                                                                | n/a     |
| Descriptive data             | 14*     | (a) Give characteristics of study participants (eg demographic, clinical, social) and information on exposures and potential confounders                                                          | Table 1 |
|                              |         | (b) Indicate number of participants with missing data for each variable of interest                                                                                                               | Table 1 |

|                          |     |                                                                                                                                                                                                              |                       |
|--------------------------|-----|--------------------------------------------------------------------------------------------------------------------------------------------------------------------------------------------------------------|-----------------------|
| Outcome data             | 15* | Report numbers of outcome events or summary measures                                                                                                                                                         | Page 7,<br>Figure 1-3 |
| Main results             | 16  | (a) Give unadjusted estimates and, if applicable, confounder-adjusted estimates and their precision (eg, 95% confidence interval). Make clear which confounders were adjusted for and why they were included | Table 3               |
|                          |     | (b) Report category boundaries when continuous variables were categorized                                                                                                                                    | n/a                   |
|                          |     | (c) If relevant, consider translating estimates of relative risk into absolute risk for a meaningful time period                                                                                             | n/a                   |
| Other analyses           | 17  | Report other analyses done—eg analyses of subgroups and interactions, and sensitivity analyses                                                                                                               | n/a                   |
| <b>Discussion</b>        |     |                                                                                                                                                                                                              |                       |
| Key results              | 18  | Summarise key results with reference to study objectives                                                                                                                                                     | 14-15                 |
| Limitations              | 19  | Discuss limitations of the study, taking into account sources of potential bias or imprecision. Discuss both direction and magnitude of any potential bias                                                   | 18                    |
| Interpretation           | 20  | Give a cautious overall interpretation of results considering objectives, limitations, multiplicity of analyses, results from similar studies, and other relevant evidence                                   | 16,17                 |
| Generalisability         | 21  | Discuss the generalisability (external validity) of the study results                                                                                                                                        | 18                    |
| <b>Other information</b> |     |                                                                                                                                                                                                              |                       |
| Funding                  | 22  | Give the source of funding and the role of the funders for the present study and, if applicable, for the original study on which the present article is based                                                | 18                    |

\*Give information separately for exposed and unexposed groups.

**Note:** An Explanation and Elaboration article discusses each checklist item and gives methodological background and published examples of transparent reporting. The STROBE checklist is best used in conjunction with this article (freely available on the Web sites of PLoS Medicine at <http://www.plosmedicine.org/>, Annals of Internal Medicine at <http://www.annals.org/>, and Epidemiology at <http://www.epidem.com/>). Information on the STROBE Initiative is available at [www.strobe-statement.org](http://www.strobe-statement.org).

# BMJ Open

## Guideline-based exercise management for hip and knee osteoarthritis: a cross-sectional comparison of healthcare professional and patient beliefs in Ireland.

|                                 |                                                                                                                                                                                                                                                                                                                                                                                                                                                                                                                                                                                                                                                                                                                                                                                                                                                                                                                                                                                                                                                                                                                     |
|---------------------------------|---------------------------------------------------------------------------------------------------------------------------------------------------------------------------------------------------------------------------------------------------------------------------------------------------------------------------------------------------------------------------------------------------------------------------------------------------------------------------------------------------------------------------------------------------------------------------------------------------------------------------------------------------------------------------------------------------------------------------------------------------------------------------------------------------------------------------------------------------------------------------------------------------------------------------------------------------------------------------------------------------------------------------------------------------------------------------------------------------------------------|
| Journal:                        | <i>BMJ Open</i>                                                                                                                                                                                                                                                                                                                                                                                                                                                                                                                                                                                                                                                                                                                                                                                                                                                                                                                                                                                                                                                                                                     |
| Manuscript ID                   | bmjopen-2023-080646.R2                                                                                                                                                                                                                                                                                                                                                                                                                                                                                                                                                                                                                                                                                                                                                                                                                                                                                                                                                                                                                                                                                              |
| Article Type:                   | Original research                                                                                                                                                                                                                                                                                                                                                                                                                                                                                                                                                                                                                                                                                                                                                                                                                                                                                                                                                                                                                                                                                                   |
| Date Submitted by the Author:   | 25-Apr-2024                                                                                                                                                                                                                                                                                                                                                                                                                                                                                                                                                                                                                                                                                                                                                                                                                                                                                                                                                                                                                                                                                                         |
| Complete List of Authors:       | Toomey, Clodagh; University of Limerick, School of Allied Health; University of Limerick Health Research Institute<br>Bhardwaj, Avantika; University of Limerick, School of Allied Health; University of Limerick Health Research Institute<br>Browne, Jacqui; IMPACT Steering Committee, Patient Representative<br>Dowling, Ian; Ian Dowling Physiotherapy Clinic<br>Grealis, Stacey; IMPACT Steering Committee, Patient Representative; University College Dublin, Centre of Arthritis Research<br>Hayes, Peter; University of Limerick, School of Medicine; University of Limerick Health Research Institute<br>Higgins, Niall; University of Limerick, School of Allied Health<br>Maguire, Darragh; National Orthopaedic Hospital Cappagh, Physiotherapy Department<br>O’Hora, John; Health Service Executive, Community Healthcare West<br>Rector, Joseph; University of Limerick, School of Allied Health<br>Wood-Thornsbury, Arianna; University of Limerick, School of Allied Health<br>Kennedy, Norelee; University of Limerick, School of Allied Health; University of Limerick Health Research Institute |
| <b>Primary Subject Heading</b>: | Evidence based practice                                                                                                                                                                                                                                                                                                                                                                                                                                                                                                                                                                                                                                                                                                                                                                                                                                                                                                                                                                                                                                                                                             |
| Secondary Subject Heading:      | Rheumatology, Rehabilitation medicine, Patient-centred medicine                                                                                                                                                                                                                                                                                                                                                                                                                                                                                                                                                                                                                                                                                                                                                                                                                                                                                                                                                                                                                                                     |
| Keywords:                       | Physical Therapy Modalities, RHEUMATOLOGY, Protocols & guidelines < HEALTH SERVICES ADMINISTRATION & MANAGEMENT, Hip < ORTHOPAEDIC & TRAUMA SURGERY, Knee < ORTHOPAEDIC & TRAUMA SURGERY                                                                                                                                                                                                                                                                                                                                                                                                                                                                                                                                                                                                                                                                                                                                                                                                                                                                                                                            |
|                                 |                                                                                                                                                                                                                                                                                                                                                                                                                                                                                                                                                                                                                                                                                                                                                                                                                                                                                                                                                                                                                                                                                                                     |

SCHOLARONE™  
Manuscripts



I, the Submitting Author has the right to grant and does grant on behalf of all authors of the Work (as defined in the below author licence), an exclusive licence and/or a non-exclusive licence for contributions from authors who are: i) UK Crown employees; ii) where BMJ has agreed a CC-BY licence shall apply, and/or iii) in accordance with the terms applicable for US Federal Government officers or employees acting as part of their official duties; on a worldwide, perpetual, irrevocable, royalty-free basis to BMJ Publishing Group Ltd ("BMJ") its licensees and where the relevant Journal is co-owned by BMJ to the co-owners of the Journal, to publish the Work in this journal and any other BMJ products and to exploit all rights, as set out in our [licence](#).

The Submitting Author accepts and understands that any supply made under these terms is made by BMJ to the Submitting Author unless you are acting as an employee on behalf of your employer or a postgraduate student of an affiliated institution which is paying any applicable article publishing charge ("APC") for Open Access articles. Where the Submitting Author wishes to make the Work available on an Open Access basis (and intends to pay the relevant APC), the terms of reuse of such Open Access shall be governed by a Creative Commons licence – details of these licences and which [Creative Commons](#) licence will apply to this Work are set out in our licence referred to above.

Other than as permitted in any relevant BMJ Author's Self Archiving Policies, I confirm this Work has not been accepted for publication elsewhere, is not being considered for publication elsewhere and does not duplicate material already published. I confirm all authors consent to publication of this Work and authorise the granting of this licence.

1  
2  
3 **Guideline-based exercise management for hip and knee osteoarthritis: a cross-**  
4 **sectional comparison of healthcare professional and patient beliefs in Ireland.**  
5  
6  
7  
8

9 **ABSTRACT**  
10

11 **Objectives:** To identify within-stakeholder agreement and between-stakeholder differences  
12 in beliefs regarding exercise for osteoarthritis among general practitioners (GPs),  
13 physiotherapists (PTs) and people with hip and knee osteoarthritis (PwOA). A secondary  
14 objective was to explore the association between referral patterns and beliefs of PwOA.  
15  
16  
17

18 **Design:** Cross-sectional  
19

20 **Setting:** Online surveys administered to GPs, PTs and PwOA in Ireland via social media  
21 and healthcare networks.  
22  
23

24 **Participants:** 421 valid responses (n=161 GPs, n=163 PTs, n=97 PwOA).  
25

26 **Primary and secondary outcome measures:** Nine beliefs statements related to exercise  
27 effectiveness, safety and delivery were rated on a 5-point Likert scale and analysed for  
28 within-stakeholder consensus. Chi-square tests assessed differences in agreement between  
29 groups. Multivariable linear regression models tested associations between beliefs in PwOA  
30 and referral to/attendance at physiotherapy.  
31  
32  
33

34 **Results:** Positive within-stakeholder consensus (>75% agreement) was reached for most  
35 statements (7/9 GPs, 6/9 PTs, 5/9 PwOA). However, beliefs of PwOA were significantly less  
36 positive compared to healthcare professionals for six statements. All stakeholders disagreed  
37 that exercise is effective regardless of the level of pain. Attendance at physiotherapy (49% of  
38 PwOA), rather than referral to physiotherapy from a GP only, was associated with positive  
39 exercise beliefs for PwOA [ $\beta=0.287$  (95% CI 0.299, 1.821)].  
40  
41  
42  
43  
44

45 **Conclusions:** Beliefs about exercise therapy for osteoarthritis are predominantly positive  
46 across all stakeholders, albeit less positive in PwOA. PwOA are more likely to have positive  
47 beliefs if they have seen a physiotherapist for their osteoarthritis. Knowledge translation  
48 should highlight the effectiveness of exercise for all levels of pain and osteoarthritis disease.  
49  
50  
51

52  
53  
54 **Strengths and Limitations**  
55

- 56  
57
  - Differences in beliefs about exercise between healthcare professionals and patients  
58 with osteoarthritis has not previously been examined.  
59  
60



- This study also explored how healthcare professional visits may influence beliefs about effectiveness of evidence-based care.
- This was a cross-sectional study so no inferences can be made.
- Different results with respect to beliefs and influences may have been found if non-online recruitment methods were available (e.g. paper surveys in healthcare settings).

For peer review only

## INTRODUCTION

The management of hip and knee osteoarthritis (OA), as for other chronic conditions, should be determined by best available evidence. Although there is no cure for this burdensome disease, healthcare professionals in this field have for a long time had a wealth of high-quality evidence to draw from, all pointing to optimal core clinical management that consists of land-based exercise, education and weight loss if appropriate[1,2]. Despite this, implementation of these guidelines in practice is not optimal, often resulting in care that is fragmented in nature or considered low-value [3]. A global meta-analysis involving 16,103 people with OA (PwOA) in community care, revealed that only 39% received a referral or recommendation to exercise,[4] while a UK-based survey in 2018 revealed that only 3.9% of the 502 respondents with an OA diagnosis, were using exercise as part of their management[5]. Some similarities in shortcomings to implementation of guidelines for musculoskeletal health have been identified globally[6].

Alongside use of best evidence, the provision of patient-centred care is a pillar of high-quality care that should help guide treatment for PwOA[7]. Literature and expert opinion recommendations state that it is important to assess patient ideas and concerns regarding the cause and management of their pain, and to take into account their expectations and preferences for treatment[7]. Regarding exercise, researchers have identified a considerable amount of uncertainty among PwOA regarding the benefits of exercise for their pain. Results from cross-sectional surveys and semi-structured interviews have indicated that a lack of knowledge on the condition may result in patients believing that surgery is their only option[8,9]. Furthermore, a view of OA as a “wear and tear” condition was associated with the perspective that exercise was a counterintuitive treatment[8–10]. Since it is widely understood that beliefs influence health-related behaviours [11,12], and because stronger recommendations for exercise have been made since previous publications[2,5,9], an updated understanding of how PwOA view exercise is required.

Healthcare professionals’ perceptions and beliefs will affect the advice and management they offer patients, and researchers have suggested that those with biomedical or biomechanical beliefs about OA may transfer these beliefs to their patients, thus affecting their treatment choices[13,14]. Currently, general practitioners (GPs) and physiotherapists (PTs) are considered among the core care providers for PwOA[15]. While PT’s have the knowledge and skills to adopt a key role in the management of hip and knee OA, GPs remain the most frequently accessed source of formal medical advice and treatment[15,16]. The language used by healthcare professionals, especially GPs, can have a profound influence on patients’ beliefs[17,18]. A systematic review from Cottrell et al [19] in 2010,

1  
2  
3 found that the attitudes and beliefs of GPs concerning exercise and chronic knee pain varied  
4 widely. An updated UK-based survey of GPs in 2017 found that perspectives were positive,  
5 with 87% reporting the use of exercise in their practice [16]. However, only 11% reported  
6 using exercise in ways that aligned with evidence-based guidelines [16]. This demonstrates  
7 the need for a better understanding of how GPs interact with up-to-date resources for care  
8 advancements for OA, in a time-demanding profession.  
9  
10  
11

12  
13 A scoping review of qualitative research exploring attitudes and beliefs, shows that PTs  
14 generally have a positive attitude to activity and exercise in OA management, despite  
15 indications that some PTs may also be lacking up-to-date knowledge about best practice or  
16 may not be adhering to evidence-based treatments[20]. In contrast, a recent mixed-methods  
17 evaluation by Barton et al [21] in 2021 reported that awareness regarding evidence  
18 supporting exercise for knee OA was good (89–96%) amongst PTs in Australia and Canada.  
19  
20  
21  
22

23 Greater knowledge around beliefs and belief influencers are needed in order to address  
24 negative beliefs or myths associated with exercise and joint pain. The objective of this study  
25 was to identify within-stakeholder agreement and between-stakeholder differences in beliefs  
26 in relation to statements on exercise for management of hip and knee OA in PwOA, GPs and  
27 PTs. Secondary objectives were to explore any associations between beliefs of PwOA and  
28 whether they had ever received a GP referral to physiotherapy or had seen a PT for their  
29 painful joint. Based on previous work [9,13,16], it was hypothesised that exercise beliefs of  
30 PTs would be more positive, and in line with clinical guidelines and latest evidence,  
31 compared to GPs and PwOA. It was also hypothesised that PwOA who had received a  
32 physiotherapy referral from their GP, or who had seen a PT for their condition would have  
33 more positive beliefs about exercise compared to those who had not. Finally, an exploration  
34 of common sources of education for GPs and PTs was included to understand how beliefs  
35 regarding evidence are influenced.  
36  
37  
38  
39  
40  
41  
42  
43

## 44 **METHODS**

### 45 **Design and Recruitment**

46  
47 This study incorporates an analysis of three cross-sectional online surveys administered to  
48 three stakeholder groups - GPs, PTs and PwOA – in Ireland between March and September  
49 2021. This cross-sectional study is embedded in a larger study (IMPACT – Implementation  
50 of osteoarthritis clinical guidelines together)[22], that aims to co-design and evaluate  
51 implementation strategies for an exercise and education programme for PwOA in Ireland.  
52 Surveys were adapted from previous studies in this field [9,13,16] and reviewed by co-  
53 researchers of a public and patient involvement (PPI) steering committee of representative  
54 stakeholders prior to distribution. Validation consisted of a round of pre-testing with a  
55  
56  
57  
58  
59  
60

1  
2  
3 convenience sample of three of each GPs, PTs and PwOA with feedback provided on  
4 readability, acceptability and appropriateness that was incorporated before distribution.  
5  
6 Qualtrics© software (Qualtrics, Provo, UT) was used to administer the online surveys and all  
7  
8 procedures were approved by the University of Limerick Faculty of Education & Health  
9  
10 Sciences Research Ethics Committee (REC) (2020\_12\_13\_EHS) and the Irish College of  
11  
12 General Practitioners REC (ICGP\_REC\_21\_0006). Surveys were completed anonymously  
13  
14 after participants were provided with a participant information sheet and consent was implied  
15  
16 by completion of the survey. Reporting is consistent with the Strengthening the Reporting of  
17  
18 Observational Studies in Epidemiology (STROBE) guidelines for cross-sectional studies.

18  
19 The PT survey was distributed via email invite to all members of the Irish Society of  
20  
21 Chartered Physiotherapists (n=2022), working across all fields. The survey was also  
22  
23 advertised via social media (Twitter, LinkedIn) and amongst networks of researchers and  
24  
25 PPI steering committee members. Physiotherapists were eligible for inclusion if they: (1)  
26  
27 were practicing in Ireland, and (2) treated a patient with hip or knee OA in the past six  
28  
29 months. The GP survey was distributed to the Irish College of General Practitioners network  
30  
31 (n=3152), the University of Limerick Education and Research Network for General Practice  
32  
33 (ULEARN-GP) network[23] (n=140) and via social media (Twitter, LinkedIn). GPs were  
34  
35 eligible to take part if they were currently treating patients with hip and/or knee pain in  
36  
37 Ireland. The survey for PwOA was advertised via social media (Twitter, LinkedIn), Arthritis  
38  
39 Ireland social media, News Rheum patient newsletter and colleagues and networks of  
40  
41 project steering committee and research team members. PwOA were eligible to take part if  
42  
43 they (1) were living on the island of Ireland, (2) at least 30 years of age, (3) had chronic hip  
44  
45 or knee pain for at least 6 months or more, and (4) did not have joint replacement surgery on  
46  
47 at least one of the painful hips or knees. Strategies to increase recruitment via social media  
48  
49 across all three surveys were adopted including tagging specific advocacy groups, patient or  
50  
51 professional organisations and influencers, providing visual infographics alongside social  
52  
53 media posts and aligning posts with events e.g. National Arthritis Day.

## 47 **Outcomes**

49  
50 Each survey (Supplementary file 1) included an initial set of questions related to participant  
51  
52 demographics. For healthcare professionals, these included questions on sex [are you: (1)  
53  
54 Male, (2) Female, (3) Prefer not to say], length of time qualified, work setting, details of  
55  
56 specific post-qualification training related to OA/chronic pain, confidence in treating hip and  
57  
58 knee OA, percentage of typical caseload with hip or knee OA and where they prefer to  
59  
60 access knowledge of management for persons with hip or knee OA. For PwOA,  
demographic information related to sex [are you: (1) Male, (2) Female, (3) Prefer not to say],

1  
2  
3 age category, geographical area and health conditions were asked. In relation to joint pain,  
4 questions regarding location, duration, severity, referrals to exercise, and use of clinical  
5 guideline specific treatments (muscle strengthening, aerobic exercise, education, weight  
6 loss) were asked. Additional questions were provided for PwOA to understand healthcare  
7 utilisation and previous experiences with exercise.  
8  
9  
10

11 In each survey, a list of statements on exercise beliefs for hip and knee OA were provided  
12 and were rated on a 5-point Likert scale from strongly agree to strongly disagree. The belief  
13 statements were intended to align with current evidence-based guidelines[1,2] and best  
14 practice for exercise and OA. Healthcare professionals were given a more extensive list of  
15 statements that were related to exercise type or referral decisions. A final section related to  
16 barriers and enablers to exercise delivery, referral or uptake was included in each survey.  
17  
18 Results of that analysis are presented elsewhere.  
19  
20  
21  
22

### 23 **Statistical Analysis**

24  
25 Demographic outcomes were summarised as counts/proportions as appropriate. Belief  
26 statements were grouped and summarised descriptively by theme i.e., exercise type and  
27 effectiveness, exercise safety and exercise delivery. Although some statements had slightly  
28 different wording to facilitate understanding and relevance to each group, there were nine  
29 statements that were deemed to be comparable across groups and used to analyse  
30 differences in beliefs. Responses for the 5-point Likert scale statements were collapsed to a  
31 binary scale to label positive beliefs (“strongly agree” or “somewhat agree”) vs. negative  
32 beliefs (“strongly disagree”, “somewhat disagree” or “neither”). “Neither” was included with  
33 negative beliefs since statements were deemed to align somewhat with best practice and  
34 anything short of agreement may be considered unsatisfactory knowledge translation or  
35 personal experience. A commonly defined cut-off for consensus (>75%)[24] between  
36 stakeholders was used. Chi-square (2 x 3) tests of independence were used to assess  
37 differences in agreement with statements between three groups, and Bonferroni adjustment  
38 for between-group differences (p<0.05). Multivariable linear regression was used to explore  
39 associations between exercise beliefs (number of statements agreed with (range 0-9)) in  
40 PwOA and (1) physiotherapy referral from their GP (*Has your GP ever referred you to a*  
41 *physiotherapist for your painful joint? Yes/No*), and (2) physiotherapy attendance (*Have you*  
42 *seen a physiotherapist for your painful joint? Yes/No*). Histograms, Kolmogorov-Smirnov  
43 tests and scatter plots of residuals vs. fitted values were used to test assumptions of Poisson  
44 and linear regression and linear regression was deemed more appropriate. Pearson  
45 correlation coefficients (r>0.5) and variance inflation factor (>5) were used to determine  
46 presence of collinearity between variables. Based on correlates of physical activity for hip  
47  
48  
49  
50  
51  
52  
53  
54  
55  
56  
57  
58  
59  
60

1  
2  
3 and knee OA from previous literature, the following covariates were included using an enter  
4 method in each model: sex[25], average pain rating (none/mild/moderate/severe)[25], pain  
5 duration (6 months-1 year /1-2 years /2-3 years /3-4 years /4+ years)[26] and number of  
6 comorbidities[25]. The most parsimonious models were reported checking for a 10%  
7 difference in beta coefficients upon removal of covariates ( $p>0.05$ ). Data were analysed  
8 using IBM-SPSS version 26.0.0 and Microsoft Excel365.  
9  
10  
11  
12

### 13 **Patient and public involvement**

14  
15 This research was conducted as part of a larger project (IMPACT) that uses a participatory  
16 health research approach. A steering committee of key stakeholders with relevant research,  
17 clinical/system expertise or lived experience (academics, people with arthritis, patient  
18 advocacy group members, physiotherapists, GPs, orthopaedic surgeon) have oversight of  
19 the project from inception to dissemination. Members of the committee were involved in  
20 designing the research question and outcome measures for these surveys, recruitment of  
21 participants, interpretation of analyses and dissemination as co-authors of the publication.  
22  
23  
24  
25  
26

### 27 **RESULTS**

28  
29 There was a total of 421 valid responses from the three distributed surveys, comprising 161  
30 GPs, 163 PTs and 97 PwOA. An additional 26 GP, 33 PT and 15 PwOA surveys were  
31 collected but were not fully completed or did not contain sufficient data for analysis so were  
32 excluded. Demographic data for each stakeholder are presented in **Table 1**.  
33  
34  
35

### 36 **Experiences with Exercise for People with Osteoarthritis**

37  
38 Of the 97 PwOA, 78.4% ( $n=76$ ) had spoken to their GP regarding their joint pain, 63.9%  
39 ( $n=62$ ) had an X-ray of their joint. 38.5% ( $n=37$ ) had been referred to physiotherapy by their  
40 GP and 48.5% ( $n=47$ ) had seen a physiotherapist for their joint (either through GP- or self-  
41 referral). Additionally, 50.5% ( $n=49$ ) reported having been given specific exercises for their  
42 joint by any healthcare professional. A flow diagram with breakdown of these referral  
43 patterns is displayed in **Figure 1**. **Figure 2** shows answers to questions regarding the types  
44 of treatments tried by PwOA, as per clinical guideline recommendations (aerobic exercise,  
45 strengthening exercise, education and weight management).  
46  
47  
48  
49  
50  
51

### 52 **Within-Stakeholder Agreement in Beliefs about Exercise Type and Effectiveness,** 53 **Exercise Safety and Delivery**

54  
55 **Figure 3** shows the Likert scale results in each stakeholder group for statements (a-d),  
56 related to the effectiveness of different types of exercise and for different levels of pain or  
57 perceived severity. **Figure 4** shows the Likert scale results in each stakeholder group for  
58  
59  
60

statements (e-i), related to the safety and delivery of different types of exercise for people with OA. Beliefs were predominantly positive amongst GP's [positive consensus (>75% agreement) on 7/9 statements], PTs (6/9 statements) and PwOA (5/9 statements).

### Between-Stakeholder Differences in Beliefs about Exercise Type and Effectiveness, Exercise Safety and Delivery

Results of chi-square tests for differences in agreement between stakeholders across beliefs statements are presented in **Table 2**. There were differences in stakeholder responses across all statements, except for statement (d): "Exercise works just as well for everybody, regardless of the amount of pain they have" ( $X^2 = 5.14$ ,  $p=0.076$ ). All three stakeholder groups reached a negative consensus regarding this statement. In six of the eight statements where differences were observed, patient beliefs were significantly different to healthcare professional beliefs. There were two statements with a medium effect size for differences between PwOA and service providers: statements (b) "Hip and knee problems can be improved by specific muscle strengthening exercises" ( $V=0.309$ ) and (h) "Most patients with hip or knee OA would benefit from a supervised group exercise programme" ( $V=0.384$ ). All other differences had a small effect size.

**Table 1.** Descriptive statistics using count (proportions) for healthcare professionals and people with osteoarthritis demographics

| Healthcare Professionals Demographics                   | GP (n=161) | PT (n=163) | People with Hip or Knee Osteoarthritis Demographics | PwOA N=97 |
|---------------------------------------------------------|------------|------------|-----------------------------------------------------|-----------|
|                                                         | Count (%)  | Count (%)  |                                                     | Count (%) |
| <b>Sex:</b>                                             |            |            | <b>Sex:</b>                                         |           |
| Female                                                  | 88 (54.7)  | 128 (78.5) | Female                                              | 76 (78.4) |
| Male                                                    | 72 (44.7)  | 34 (20.9)  | Male                                                | 20 (20.6) |
| Prefer not to say                                       | 1 (0.6)    | 1 (0.6)    | Prefer not to say                                   | 1 (1.0)   |
| <b>How long have you been qualified?</b>                |            |            | <b>Most bothersome joint:</b>                       |           |
| Less than 5 years                                       | 33 (20.5)  | 19 (11.7)  | Knee                                                | 52 (53.8) |
| 5-10 years                                              | 25 (15.5)  | 21 (12.9)  | Hip                                                 | 45 (46.4) |
| More than 10 years                                      | 103 (64.0) | 123 (75.5) | <b>Age Category:</b>                                |           |
| <b>Work practice setting (GPs)</b>                      |            |            | 30-39 years                                         | 12 (12.4) |
| Urban                                                   | 60 (37.3)  | -          | 40-49 years                                         | 24 (24.7) |
| Rural                                                   | 34 (21.1)  | -          | 50-59 years                                         | 30 (30.9) |
| Mixed                                                   | 67 (41.6)  | -          | 60-69 years                                         | 25 (25.8) |
| <b>Work practice setting (PTs)</b>                      |            |            | 70-79 years                                         | 6 (6.2)   |
| Public hospital                                         | -          | 38 (23.3)  | <b>Living Location:</b>                             |           |
| Private hospital                                        | -          | 7 (4.3)    | Inner city or suburb                                | 46 (47.4) |
| Primary care                                            | -          | 41 (25.2)  | Town                                                | 16 (16.5) |
| Private practice clinic                                 | -          | 70 (42.9)  | Village                                             | 15 (15.5) |
| Other                                                   | -          | 7 (4.3)    | Open country                                        | 20 (20.6) |
| <b>Post-qualification training on OA / chronic pain</b> |            |            | <b>No. of other comorbidities:</b>                  |           |
| No                                                      | 72 (44.7)  | 37 (22.7)  | 0                                                   | 31 (32.0) |

|                                               |            |           |                                                   |           |
|-----------------------------------------------|------------|-----------|---------------------------------------------------|-----------|
| Inservice/webinars/reading                    | 32 (19.9)  | 17 (10.4) | 1-2                                               | 45 (47.9) |
| Course or conference                          | 28 (17.4)  | 72 (44.2) | 3+                                                | 18 (19.1) |
| Diploma/APP or certification                  | 15 (9.3)   | 3 (1.8)   | <b>Multi-joint pain(&gt;1):</b>                   |           |
| MSc in related field                          | 14 (8.7)   | 32 (19.6) | No                                                | 6 (6.2)   |
| PhD in related field                          | 0          | 2 (1.2)   | Yes                                               | 91 (93.8) |
| <b>Confidence in treating hip and knee OA</b> |            |           | <b>Rating of pain /symptoms on an average day</b> |           |
| Not confident                                 | 2 (1.2)    | 0         | No pain/symptoms                                  | 1 (1.0)   |
| Slightly confident                            | 33 (20.5)  | 5 (3.1)   | Mild                                              | 30 (30.9) |
| Confident                                     | 80 (49.7)  | 41 (25.2) | Moderate                                          | 49 (50.5) |
| Very confident                                | 36 (22.4)  | 86 (52.8) | Severe                                            | 17 (17.5) |
| Extremely confident                           | 10 (6.2)   | 31 (19.0) | <b>Duration of pain</b>                           |           |
| <b>% of typical caseload with hip/knee OA</b> |            |           | 6 mon – 1 year                                    | 24 (24.7) |
| 1-5%                                          | 19 (11.8)  | 19 (11.7) | 1-2 years                                         | 13 (13.4) |
| 6-25%                                         | 117 (72.7) | 83 (50.9) | 2-3 years                                         | 15 (15.5) |
| 26-50%                                        | 24 (14.9)  | 36 (22.1) | 3-4 years                                         | 11 (11.3) |
| 51-75%                                        | 1 (0.6)    | 18 (11.0) | More than 4 years                                 | 34 (35.1) |
| >75%                                          | 0          | 5 (3.1)   |                                                   |           |

APP, Advanced Practice Physiotherapist; GP, General Practitioner; OA, Osteoarthritis; PT, Physiotherapist; PwOA, People with Osteoarthritis.

**Table 2.** Differences in agreement with statements between general practitioner (GP; n=161), physiotherapist (PT; n=163) and people with hip and knee osteoarthritis (PwOA; n=97). Agreement was defined as those who selected “strongly agree” or “somewhat agree” on Likert scales. Proportions that reached within-stakeholder “consensus”, defined as >75% majority, are in bold.

| Statement                                                                                               | Proportion in agreement |                           |                           | Chi-Square | Significance | Cramer's V |
|---------------------------------------------------------------------------------------------------------|-------------------------|---------------------------|---------------------------|------------|--------------|------------|
|                                                                                                         | GP                      | PT                        | PwOA                      |            |              |            |
| <b>(a) Hip and knee problems can be improved by general exercise e.g. walking and swimming</b>          | <b>97.5%</b>            | <b>95.1%</b>              | <b>85.6%</b> <sup>a</sup> | 15.59      | <0.0001      | 0.193      |
| <b>(b) Hip and knee problems can be improved by specific muscle strengthening exercises</b>             | <b>98.8%</b>            | <b>97.5%</b>              | <b>80.9%</b> <sup>a</sup> | 39.04      | <0.0001      | 0.309      |
| <b>(c) Exercise is effective for patients if an x-ray shows severe osteoarthritis</b>                   | 53.8%                   | 63.4%                     | 39.8% <sup>c</sup>        | 13.24      | 0.001        | 0.179      |
| <b>(d) Exercise works just as well for everybody, regardless of the amount of pain they have</b>        | <b>24.2%</b>            | <b>19.6%</b>              | 32.3%                     | 5.14       | 0.076        | n/a        |
| <b>(e) General exercise e.g., walking and swimming is safe for everybody to do</b>                      | <b>85.7%</b>            | 68.9% <sup>b</sup>        | <b>87.1%</b>              | 18.13      | <0.0001      | 0.209      |
| <b>(f) Specific muscle strengthening exercise is safe for everyone to do</b>                            | <b>85.6%</b>            | <b>84.5%</b>              | 69.2% <sup>a</sup>        | 11.86      | 0.003        | 0.170      |
| <b>(g) Every patient with hip or knee OA should try exercise treatment before surgery is considered</b> | <b>86.9%</b>            | <b>99.4%</b> <sup>b</sup> | <b>91.4%</b>              | 19.0       | <0.0001      | 0.214      |
| <b>(h) Most patients with hip or knee OA would benefit from a supervised group exercise programme*</b>  | <b>91.3%</b>            | <b>85.3%</b>              | 52.1% <sup>a</sup>        | 61.35      | <0.0001      | 0.384      |
| <b>(i) Most patients with hip or knee OA would benefit from an individualized exercise programme*</b>   | <b>96.3%</b>            | <b>93.9%</b>              | <b>82.8%</b> <sup>a</sup> | 15.91      | <0.0001      | 0.196      |

<sup>a</sup>Significantly different compared to GP and PT, <sup>b</sup>significantly different to GP and PwOA, <sup>c</sup>significantly different



to PT, using Bonferroni at .05 level. \*Questions for PwOA phrased as: “The best way to learn about exercise is in a supervised group setting with people who have similar pain” and “The best way to learn about exercise is in a one-on-one setting with a health professional”. Cramer’s V =0.1 small, 0.3 medium, 0.5 large effect size. GP, general practitioner; OA, osteoarthritis; PT, physiotherapist; PwOA, people with osteoarthritis.

## Predictors of Patient Beliefs

There was no association between beliefs of PwOA about exercise and the question: “has your GP ever referred you to a physiotherapist for your painful joint?” (**Supplemental File 2**) [B=0.19 (95% CI -0.10, 1.50)]. In this model, a higher number of comorbidities [B=-0.26 (95% CI -0.56, -0.07)] was negatively associated with beliefs about exercise. In model 2, there was a positive association between beliefs of PwOA about exercise and the question: “Have you seen a physiotherapist for your painful joint?” [B=1.06 (95% CI 0.30, 1.82)]. Sex (male) [B=-0.72 (95% CI -1.44, -0.00)], a longer duration of pain and symptoms [B=-0.20 (95% CI -0.40, -0.01)] and a higher number of comorbidities [B=-0.29 (95% CI -0.53, -0.06)] were negatively associated with beliefs about exercise in this model.

## Healthcare Professional Sources of Education

For the question, “Where do you get your knowledge of care advancements for persons with knee or hip osteoarthritis?”; the top five selected responses for GPs were continuous medical education (CME) or GP training networks (78%), published guidelines or recommendations (61%), reading medical journals (47%), conference attendance (47%) and course attendance (31%). For the question, “Where do you access your knowledge of management for persons with knee or hip osteoarthritis?”; the top five selected responses for PTs were published guidelines or recommendations (85%), reading research articles (75%), clinic protocols and discussion with peers or in-services (70%), course attendance (61%) and conference attendance (47%).

## DISCUSSION

This research identified differences in beliefs about exercise effectiveness, safety and delivery between healthcare professionals and PwOA. While predominantly positive beliefs were observed across stakeholders, there was less consensus regarding the effectiveness of exercise when an X-ray shows “severe” OA. With regards to exercise referral, 48.5% of PwOA had either been referred to or self-referred to a physiotherapist for their joint pain. Referral to a physiotherapist by their GP was not associated with positive exercise beliefs.

1  
2  
3 However, attendance at a physiotherapist for joint pain was associated with positive exercise  
4 beliefs in PwOA.  
5

6  
7 If OA management guidelines do not align with the personal beliefs of service providers or  
8 users, PwOA may not receive high quality care. This study has found that GPs (7/9  
9 statements), PTs (6/9 statements) and PwOA (5/9 statements) have largely positive beliefs  
10 regarding exercise for OA. However, there is less certainty about exercise when an X-ray  
11 shows “severe osteoarthritis” across all stakeholders, and service providers do not agree  
12 that “*exercise works just as well for everybody, regardless of the level of pain they have*”.  
13 These results highlight that beliefs are generally in line with best evidence and clinical  
14 guidelines. However, there may still be some misconceptions about the effectiveness of  
15 exercise for higher levels of pain and disease. Evidence suggests that the pain-relieving  
16 qualities of exercise are effective for even moderate to severe OA disease[27–29], and a  
17 more recent meta-analysis for hip and knee OA has shown that individuals with higher pain  
18 severity at baseline benefit more from therapeutic exercise than those with lower pain[30].  
19 This evidence should be a focus of future efforts of knowledge translation to clinicians and  
20 PwOA.  
21  
22  
23  
24  
25  
26  
27  
28  
29

30 Some of the beliefs identified in this study are reflective of the traditional view of OA as a  
31 “wear and tear” disease, synonymous with a desire to protect a “damaged” joint on X-ray  
32 from further damage, as found previously[8,20]. However, an encouraging finding from this  
33 research are the overwhelmingly more positive views towards exercise observed compared  
34 to similar studies published on a cohort of UK-based PTs in 2009[13], older adults with knee  
35 pain in 2012[9] and GPs in 2017[16]. Using the comparator of statements with at least  
36 majority view (>50% agreement), in the 2009 study[13], PTs agreed on the benefit of  
37 exercise for knee pain on 4/12 statements (33%), compared to 8/9 similar statements (89%)  
38 in the current study. For older adults with knee pain, there was no agreement for any  
39 statement in the 2012 study[9], compared to 7/9 statements (78%) in the current study. This  
40 may be reflective of the younger age and inclusion of hip and knee pain in the current study.  
41 In the 2017 study[16], GPs agreed on 9/12 statements (75%), compared to 8/9 statements  
42 (89%) in the current study. While some statements varied slightly, stronger exercise  
43 recommendations in clinical guidelines and greater efforts in implementation and translation  
44 to practice in the last 10 years are likely the rationale for these changes, particularly since  
45 clinical guideline updates in 2014[1,2]. However, there is still much space to enact  
46 recommendations from a 2018 Cochrane review to provide better information and advice  
47 about the safety and value of exercise for patients[31]. In particular, providing reassurance  
48 on the role of exercise in managing symptoms, and discussion of opportunities to participate  
49  
50  
51  
52  
53  
54  
55  
56  
57  
58  
59  
60

1  
2  
3 in activities regarded as enjoyable and relevant, may encourage greater exercise  
4 participation[31].  
5

6  
7 Beliefs of PwOA about exercise were significantly less positive compared to healthcare  
8 professional beliefs for 6/9 statements, even though significantly more PwOA believed that  
9 general exercises are safe for everybody to do, compared to PTs. The greatest differences  
10 were observed for statements in relation to the benefits of strengthening exercises and  
11 group-based exercise but effect sizes were small to medium overall. Given 40% had never  
12 tried weight or strength-based training for their joint, and an additional 28% tried, but since  
13 stopped this type of exercise, healthcare professionals should be cognisant of ensuring  
14 patients understand the benefit of muscle strengthening and support patients to find  
15 enjoyable and sustainable ways to build these exercises into weekly routines. While  
16 strength-based training is not deemed superior to aerobic type exercise for pain relief in  
17 OA[27,32], knock-on benefits for improvements in physical function, longevity, bone health,  
18 and frailty[33] during ageing are important to highlight. Results for aerobic type exercise,  
19 however, were much more promising as only 14% had not tried this type of exercise for their  
20 joint and 67% were actively using. Further exploration on reasons for stopping exercise  
21 would be of benefit to determine if low adherence is related to barriers to exercise  
22 participation or a lack of perceived improvement in symptoms. While there is no strong  
23 evidence to indicate a difference in effectiveness regarding exercise setting, PwOA were  
24 less likely to agree with the benefits of a supervised group setting compared to service  
25 providers. Additional benefits of group exercise for older adults, such as social support, peer-  
26 learning, improvements in mental health and loneliness, and cost-effectiveness should,  
27 however, be considered and encouraged[34–36].  
28  
29  
30  
31  
32  
33  
34  
35  
36  
37  
38  
39  
40

41 Physiotherapists are primary care providers of therapeutic exercise for people with OA and  
42 other chronic conditions. It was therefore hypothesised that PTs would have more positive  
43 beliefs regarding exercise compared to GPs. However, this was not shown to be the case  
44 based on findings in this study. PTs were significantly more positive regarding statement (g):  
45 *Every patient with hip or knee OA should try exercise treatment before surgery is*  
46 *considered.* However, more GPs responded positively to statement (e): *General exercise*  
47 *e.g., walking and swimming is safe for everybody to do,* and overall, there was a positive  
48 consensus on more statements amongst GPs (7/9) compared to PTs (6/9). These findings  
49 are somewhat at odds to the review by Nissen et al (including studies published from 2006-  
50 2019), which identified a certain lack of knowledge about the role of physical activity,  
51 exercise and physiotherapy in OA management amongst some GPs and PTs[20]. It  
52 suggests that the main barriers to implementation of exercise may not be entirely related to  
53 lack of updated knowledge or beliefs of the healthcare professionals.  
54  
55  
56  
57  
58  
59  
60

1  
2  
3 In this study, referral to physiotherapy by a GP was not associated with more positive  
4 exercise beliefs in PwOA, in contrast to what was hypothesised. Although GPs had the most  
5 positive beliefs in comparison with other stakeholders, this finding may reflect the lack of  
6 time in a GP consultation to educate about exercise therapy and influence patient beliefs. A  
7 referral to exercise therapy alone may not be enough. However, seeing a PT for  
8 osteoarthritis was associated with more positive exercise beliefs. This may suggest that PTs  
9 impart important knowledge and education regarding the benefits of exercise to their  
10 patients, that, in turn, changes patient beliefs. Equally, this finding may suggest that PwOA  
11 with more positive exercise beliefs are more likely to attend a PT appointment. Tracking of  
12 changes in beliefs over time is recommended to further explore this association. Compared  
13 to GPs, PTs have more time in a consultation to discuss the effectiveness, mechanism, and  
14 safety of exercise for joint pain, which may help to influence beliefs and maximise the  
15 potential effect of exercise programs by improving adherence[37]. It is known that the  
16 provision of education for OA is superior for patient outcomes when combined with exercise  
17 therapy[38]. Almost 60% of PwOA reported having not tried self-management/education,  
18 despite some programme availability in Ireland[39]. PwOA were not asked specifically if their  
19 GP referred them to a self-management programme, which is a required area of further  
20 exploration. Additional efforts are required to support clinicians with resources to deliver  
21 trustworthy educational content for PwOA, or increase knowledge of available self-  
22 management programmes, to ensure clinical recommendations are fully implemented.

23  
24  
25  
26  
27  
28  
29  
30  
31  
32  
33  
34  
35 In the current study, 78% of PwOA had spoken to their GP about their joint pain, while under  
36 50% of these people had been referred to a PT. Despite OA being amongst the leading  
37 causes of years lived with disability[40], the decision to seek care can be deterred by  
38 negative or dismissive attitudes from healthcare professionals about their non-urgent  
39 condition, or the perception that pain is part of ageing[41]. Healthcare professionals should  
40 take care regarding attitudes and language use during consultations[42] to help promote the  
41 effectiveness of first-line treatment strategies. Additionally, decisions regarding treatment  
42 timing may require additional educational strategies given clinical guidelines support surgical  
43 intervention as the last resort[1,2]. In this study more PwOA were referred to an orthopaedic  
44 consultant (58%) rather than PT (49%). From the regression analysis, it is also apparent that  
45 people with multiple comorbidities may require additional supports to improve positive beliefs  
46 about exercise for their condition. For people living with the burden of multiple conditions,  
47 additional barriers to exercise may require more supportive self-management sessions and  
48 thorough training of exercise facilitators[43].

49  
50  
51  
52  
53  
54  
55  
56  
57  
58 This study has shown that the most used education sources for healthcare professionals on  
59 management of OA are: published guidelines or recommendations (85% of PTs, 61% of  
60

1  
2  
3 GPs), use of training networks, in-clinic protocols, discussion and in-services (70% of PTs,  
4 78% of GPs) and reading medical journals or research articles (75% of PTs, 47% of GPs).  
5  
6 Even where clinicians report using clinical guidelines and research to guide practice, this is  
7 no guarantee that the most up-to-date recommendations are being used with confidence, or  
8 that they are being interpreted, recalled or implemented appropriately[44]. In contrast to this  
9 study, previous international investigations have shown that only a small proportion of sport  
10 and musculoskeletal PTs use research articles to change their clinical practice (10.4%)[45].  
11 Over half of PTs instead cited “interactions with colleagues” and “attending private education  
12 short courses” as the source for change[45]. Given the high proportion of GPs that use CME  
13 small groups and training networks, peer-learning opportunities may be a viable source of  
14 intervention to ensure practice guidelines are being met[46]. The evidence to practice gap  
15 could be filled with clinical guideline supplements that address contextual barriers and time  
16 needed to treat[47], and courses/training that include opportunities to discuss real-world  
17 implementation of evidence with experienced colleagues and experts, with input from  
18 patients on delivery needs.  
19  
20  
21  
22  
23  
24  
25  
26

27 While efforts were made to recruit participants for this research from multiple diverse  
28 sources, this study was not a representative sample. The highest proportion (31%) of PwOA  
29 in this study were in the 50–59-year age category and 50% reported moderate joint pain.  
30 While prevalence of OA is higher in older age categories, the sample recruited is likely  
31 reflective of the online nature of participation, wide inclusion criteria (age 30+ years) and  
32 exclusion criteria for previous joint replacement surgery. Due to the timing of survey  
33 administration (during COVID-19 pandemic lockdown), traditional survey advertising  
34 methods such as GP and health clinic waiting rooms were not utilised. Completion of an  
35 anonymous survey has benefits as results cannot be influenced, however if there was any  
36 confusion related to phrasing of a certain question or statement, then this could not be  
37 clarified. The selection of other belief statements about exercise may have yielded different  
38 results. Future research should also investigate similar beliefs using qualitative approach to  
39 allow for more context to these answers.  
40  
41  
42  
43  
44  
45  
46  
47  
48

## 49 **Conclusion**

50  
51 Beliefs of GPs, PTs and PwOA regarding exercise as a treatment for hip and knee OA have  
52 likely become more positive in recent years. However, there is still much scope for service  
53 improvement, with less than 50% of PwOA having seen a PT for their joint pain and all  
54 stakeholders in disagreement with statements relating to effectiveness of exercise for severe  
55 joint pain. This sample included PwOA who did not have a previous joint replacement  
56 surgery and may therefore not be generalisable to an older sample with more severe  
57  
58  
59  
60

1  
2  
3 disease. Knowledge translation activities should be aimed at increasing knowledge and  
4 improving access to first-line evidence-based exercise therapies, using stakeholder co-  
5 design to provide context on barriers and facilitators.  
6  
7  
8  
9

10  
11 **Contributorship Statement** - Toomey CM: Conceptualization, Methodology, Formal  
12 Analysis, Supervision, Writing – Original Draft. Higgins N: Methodology, Formal Analysis,  
13 Writing – Reviewing & Editing; Wood-Thornsbury A: Methodology, Formal Analysis, Writing  
14 – Reviewing & Editing; Rector J: Methodology, Formal Analysis, Writing – Reviewing &  
15 Editing; Bhardwaj A: Methodology, Writing – Review & Editing; Hayes P: Methodology,  
16 Writing – Review & Editing; Browne J: Methodology, Writing – Review & Editing; Grealis S:  
17 Methodology, Writing – Review & Editing; Maguire D: Methodology, Writing – Review &  
18 Editing; O’Hora J: Methodology, Writing – Review & Editing; Dowling I: Methodology, Writing  
19 – Review & Editing; Kennedy N: Conceptualization, Supervision, Writing – Review & Editing.  
20  
21  
22  
23  
24

25  
26 **Competing Interests** – none to declare.  
27

28 **Funding** - Funding for this project (IMPACT), salary of the PI (CMT) and student fees and  
29 stipend (AB) from Health Research Board (Ireland) Emerging Investigator Award, awarded  
30 to CMT (EIA-2019-008).  
31  
32

33 **Data Sharing Statement** - All data pertaining to this study is anonymous and can be shared  
34 upon reasonable request for secondary data analysis by contacting the PI (corresponding  
35 author).  
36  
37

38 **Acknowledgements** – We acknowledge the contributions of other members of the IMPACT  
39 Steering Committee who were involved in the interpretation of these results (Adrian Cassar-  
40 Gheiti, Helen French, Brenda Monaghan, Bronwen Maher and James Young).  
41  
42  
43  
44  
45

46 **Figure 1.** Flow chart of referral patterns for people with osteoarthritis.  
47

48 **Figure 2.** Proportion of responses to guideline-based treatments people with osteoarthritis  
49 (n=97) have tried.  
50

51 **Figure 3.** 100% stacked bar chart showing Likert scale results with count for each  
52 stakeholder on belief statements (a-d) related to exercise effectiveness. GP, general  
53 practitioner; PT, physiotherapist; PwOA, people with osteoarthritis.  
54  
55

56 **Figure 4.** 100% stacked bar chart showing Likert scale results with count for each  
57 stakeholder on belief statements (e-i) related to exercise safety and delivery. \*Questions for  
58 PwOA phrased slightly differently: “The best way to learn about exercise is in a supervised  
59  
60

1  
2  
3 group setting with people who have similar pain” and “The best way to learn about exercise  
4 is in a one-on-one setting with a health professional”. GP, general practitioner; PT,  
5 physiotherapist; PwOA, people with osteoarthritis.  
6  
7  
8  
9

## 10 REFERENCES

- 11  
12  
13 1 McAlindon TE, Bannuru RR, Sullivan MC, *et al.* OARSI guidelines for the non-surgical  
14 management of knee osteoarthritis. *Osteoarthr Cartil* 2014;**22**:363–88.  
15 doi:10.1016/j.joca.2014.01.003  
16
- 17  
18 2 National Institute for Health & Clinical Excellence. Osteoarthritis: care and  
19 management. London: 2014.  
20
- 21  
22 3 Hunter DJ. Osteoarthritis: time for us all to shift the needle. *Rheumatology*  
23 2018;**57**:iv1–2. doi:10.1093/rheumatology/key065  
24
- 25  
26 4 Hagen REB, Smedslund G, Østeras N, *et al.* Quality of Community-Based  
27 Osteoarthritis Care : A Systematic Review and Meta-Analysis. *Arthritis Care Res*  
28 2016;**68**:1443–52. doi:10.1002/acr.22891  
29
- 30  
31 5 Healey EL, Afolabi EK, Lewis M, *et al.* Uptake of the NICE osteoarthritis guidelines in  
32 primary care: a survey of older adults with joint pain. *BMC Musculoskelet Disord*  
33 2018;**19**:295. doi:10.1186/s12891-018-2196-2  
34
- 35  
36 6 Briggs AM, Jordan JE, Kopansky-Giles D, *et al.* The need for adaptable global  
37 guidance in health systems strengthening for musculoskeletal health: a qualitative  
38 study of international key informants. *Glob Heal Res policy* 2021;**6**:24.  
39 doi:10.1186/s41256-021-00201-7  
40
- 41  
42 7 Geenen R, Overman CL, Christensen R, *et al.* EULAR recommendations for the  
43 health professional’s approach to pain management in inflammatory arthritis and  
44 osteoarthritis. *Ann Rheum Dis* 2018;**77**:797–807. doi:10.1136/annrheumdis-2017-  
45 212662  
46
- 47  
48 8 Darlow B, Brown M, Thompson B, *et al.* Living with osteoarthritis is a balancing act :  
49 an exploration of patients ’ beliefs about knee pain. *BMC Rheumatol* 2018;**2**.  
50 doi:10.1186/s41927-018-0023-x BMC  
51
- 52  
53 9 Holden MA, Nicholls EE, Young J, *et al.* Role of Exercise for Knee Pain : What Do  
54 Older Adults in the Community Think ? *Arthritis Care Res* 2012;**64**:1554–64.  
55 doi:10.1002/acr.21700  
56  
57  
58  
59  
60

- 1  
2  
3 10 Bunzli S, Brien PO, Ayton D, *et al*. Misconceptions and the Acceptance of Evidence-based Nonsurgical Interventions for Knee Osteoarthritis . A Qualitative Study. *Clin Orthop Relat Res* 2019;**477**:1975–83. doi:10.1097/CORR.0000000000000784
- 4  
5  
6  
7  
8  
9 11 Armitage CJ, Conner M. Social cognition models and health behaviour: A structured review. *Psychol Health* 2000;**15**:173–89. doi:10.1080/08870440008400299
- 10  
11  
12 12 Hurley M V, Walsh N, Bhavnani V, *et al*. Health beliefs before and after participation on an exercised-based rehabilitation programme for chronic knee pain: Doing is believing. *BMC Musculoskelet Disord* 2010;**11**:31. doi:10.1186/1471-2474-11-31
- 13  
14  
15  
16  
17 13 Holden MA, Nicholls EE, Young J, *et al*. UK-Based Physical Therapists ' Attitudes and Beliefs Regarding Exercise and Knee Osteoarthritis : Findings From a Mixed-Methods Study. *Arthritis Care Res* 2009;**61**:1511–21. doi:10.1002/art.24829
- 18  
19  
20  
21  
22 14 Hunter DJ. Osteoarthritis Management: Time to Change the Deck. *J Orthop Sports Phys Ther* 2017;**47**:370–2. doi:10.2519/jospt.2017.0605
- 23  
24  
25  
26  
27 15 Briggs AM, Hinman RS, Darlow B, *et al*. Confidence and Attitudes Toward Osteoarthritis Care Among the Current and Emerging Health Workforce: A Multinational Interprofessional Study. *ACR open Rheumatol* 2019;**1**:219–35. doi:10.1002/acr2.1032
- 28  
29  
30  
31  
32  
33 16 Cottrell E, Foster NE, Porcheret M, *et al*. GPs ' attitudes , beliefs and behaviours regarding exercise for chronic knee pain : a questionnaire survey. *BMJ Open* 2017;**7**. doi:10.1136/bmjopen-2016-014999
- 34  
35  
36  
37  
38  
39 17 MacKay C, Hawker GA, Jaglal SB. Qualitative study exploring the factors influencing physical therapy management of early knee osteoarthritis in Canada. *BMJ Open* 2018;**8**. doi:10.1136/bmjopen-2018-023457
- 40  
41  
42  
43  
44 18 Barker KL, Reid M, Minns Lowe CJ. What does the language we use about arthritis mean to people who have osteoarthritis? A qualitative study. *Disabil Rehabil* 2014;**36**:367–72. doi:10.3109/09638288.2013.793409
- 45  
46  
47  
48  
49 19 Cottrell E, Roddy E, Foster N. The attitudes, beliefs and behaviours of GPs regarding exercise for chronic knee pain: a systematic review. *BMC Fam Pract* 2010;**11**.<http://www.doaj.org/doaj?func=abstract&id=516161>
- 50  
51  
52  
53  
54  
55 20 Nissen N, Holm PM, Bricca A, *et al*. Clinicians' beliefs and attitudes to physical activity and exercise therapy as treatment for knee and/or hip osteoarthritis: a scoping review. *Osteoarthr Cartil* 2022;**30**:260–9. doi:10.1016/j.joca.2021.11.008
- 56  
57  
58  
59  
60



- 1  
2  
3 21 Barton CJ, Ezzat AM, Bell EC, *et al.* Knowledge , confidence and learning needs of  
4 physiotherapists treating persistent knee pain in Australia and Canada : a mixed-  
5 methods study. *Physiother Theory Pract* 2021;;1–13.  
6  
7 doi:10.1080/09593985.2021.1906805  
8  
9
- 10 22 Toomey CM, Kennedy N, Macfarlane A, *et al.* Implementation of clinical guidelines for  
11 osteoarthritis together (IMPACT): protocol for a participatory health research  
12 approach to implementing high value care. *BMC Musculoskelet Disord* 2022;**23**.  
13  
14 doi:10.1186/s12891-022-05599-w  
15  
16
- 17 23 Regan AO, Hayes P, Connor RO, *et al.* The University of Limerick Education and  
18 Research Network for General Practice ( ULEARN-GP ): practice characteristics and  
19 general practitioner perspectives. *BMC Fam Pract* 2020;**21**.  
20  
21 doi:https://doi.org/10.1186/s12875-020-1100-y  
22  
23
- 24 24 Diamond IR, Grant RC, Feldman BM, *et al.* Defining consensus: a systematic review  
25 recommends methodologic criteria for reporting of Delphi studies. *J Clin Epidemiol*  
26 2014;**67**:401–9. doi:10.1016/j.jclinepi.2013.12.002  
27  
28
- 29 25 Stubbs B, Hurley M, Smith T. What are the factors that influence physical activity  
30 participation in adults with knee and hip osteoarthritis? A systematic review of  
31 physical activity correlates. *Clin Rehabil* 2015;**29**:80–94.  
32  
33 doi:10.1177/0269215514538069  
34  
35
- 36 26 Rosemann T, Kuehlein T, Laux G, *et al.* Osteoarthritis of the knee and hip: a  
37 comparison of factors associated with physical activity. *Clin Rheumatol*  
38 2007;**26**:1811–7. doi:10.1007/s10067-007-0579-0  
39  
40
- 41 27 Juhl C, Christensen R, Roos EM, *et al.* Impact of Exercise Type and Dose on Pain  
42 and Disability in Knee Osteoarthritis A Systematic Review and Meta-Regression  
43 Analysis of Randomized Controlled Trials. *Arthritis Rheumatol* 2014;**66**:622–36.  
44  
45 doi:10.1002/art.38290  
46  
47
- 48 28 Susko AM, Fitzgerald GK. The pain-relieving qualities of exercise in knee  
49 osteoarthritis. *Open access Rheumatol Res Rev* 2013;**5**:81–91.  
50  
51 doi:10.2147/OARRR.S53974  
52  
53
- 54 29 Skou ST, Roos EM, Laursen MB, *et al.* A Randomized, Controlled Trial of Total Knee  
55 Replacement. *N Engl J Med* 2015;**373**:1597–606. doi:10.1056/NEJMoa1505467  
56  
57
- 58 30 Holden MA, Hattle M, Runhaar J, *et al.* Moderators of the effect of therapeutic  
59 exercise for knee and hip osteoarthritis : a systematic review and individual participant  
60

- 1  
2  
3 data meta-analysis. *Lancet Rheumatol* 2023;**5**:e386–400. doi:10.1016/S2665-  
4 9913(23)00122-4  
5  
6  
7 31 Hurley M, Dickson K, Hallett R, *et al.* Exercise interventions and patient beliefs for  
8 people with hip, knee or hip and knee osteoarthritis: a mixed methods review  
9 (Review). *Coch* 2018;:CD010842.  
10 doi:10.1002/14651858.CD010842.pub2.www.cochranelibrary.com  
11  
12  
13  
14 32 Goh S-L, Persson MSM, Stocks J, *et al.* Relative Efficacy of Different Exercises for  
15 Pain, Function, Performance and Quality of Life in Knee and Hip Osteoarthritis:  
16 Systematic Review and Network Meta-Analysis. *Sports Med* 2019;**49**:743–61.  
17 doi:10.1007/s40279-019-01082-0  
18  
19  
20  
21 33 Seguin R, Nelson ME. The benefits of strength training for older adults. *Am J Prev*  
22 *Med* 2003;**25**:141–9. doi:10.1016/s0749-3797(03)00177-6  
23  
24  
25 34 Komatsu H, Yagasaki K, Saito Y, *et al.* Regular group exercise contributes to  
26 balanced health in older adults in Japan: a qualitative study. *BMC Geriatr*  
27 2017;**17**:190. doi:10.1186/s12877-017-0584-3  
28  
29  
30 35 Grønne DT, Roos EM, Ibsen R, *et al.* Cost-effectiveness of an 8- - week supervised  
31 education and exercise therapy programme for knee and hip osteoarthritis : a pre –  
32 post analysis of 16 255 patients participating in Good Life with osteoArthritis in  
33 Denmark (GLA:D). *BMJ Open* 2021;**11**. doi:10.1136/bmjopen-2021-049541  
34  
35  
36  
37 36 Mays AM, Kim S, Rosales K, *et al.* The Leveraging Exercise to Age in Place (LEAP)  
38 Study: Engaging Older Adults in Community-Based Exercise Classes to Impact  
39 Loneliness and Social Isolation. *Am J Geriatr psychiatry Off J Am Assoc Geriatr*  
40 *Psychiatry* 2021;**29**:777–88. doi:10.1016/j.jagp.2020.10.006  
41  
42  
43  
44 37 Gay C, Chabaud A, Guilley E, *et al.* Educating patients about the benefits of physical  
45 activity and exercise for their hip and knee osteoarthritis. Systematic literature review.  
46 *Ann Phys Rehabil Med* 2016;**59**:174–83.  
47 doi:https://doi.org/10.1016/j.rehab.2016.02.005  
48  
49  
50  
51 38 Goff AJ, Oliveira D De, Merolli M, *et al.* Patient education improves pain and function  
52 in people with knee osteoarthritis with better effects when combined with exercise  
53 therapy : a systematic review. *J Physiother* 2021;**67**:177–89.  
54 doi:10.1016/j.jphys.2021.06.011  
55  
56  
57  
58 39 Arthritis Ireland. Living Well with Arthritis (and Related Conditions) Self-Management  
59 Programme. Courses. 2023.https://www.arthritisireland.ie/living-well-with-arthritis-and-  
60

- 1  
2  
3 related-conditions-self-management-programme (accessed 22 Aug 2023).  
4  
5  
6 40 Vos T, Lim SS, Abbafati C, *et al.* Global burden of 369 diseases and injuries in 204  
7 countries and territories, 1990-2019: a systematic analysis for the Global Burden of  
8 Disease Study 2019. *Lancet* 2020;**396**:1204–22. doi:10.1016/S0140-6736(20)30925-9  
9  
10  
11 41 Prasanna SS, Korner-bitensky N, Ahmed S. Why Do People Delay Accessing Health  
12 Care for Knee Osteoarthritis ? Exploring Beliefs of Health Professionals and Lay  
13 People. *Physiother Canada* 2013;**65**:56–64. doi:10.3138/ptc.2011-50  
14  
15  
16 42 Vennik J, Hughes S, Smith KA, *et al.* Patient and practitioner priorities and concerns  
17 about primary healthcare interactions for osteoarthritis: A meta-ethnography. *Patient*  
18 *Educ Couns* 2022;**105**:1865–77. doi:https://doi.org/10.1016/j.pec.2022.01.009  
19  
20  
21 43 Skou ST, Brødsgaard RH, Nyberg M, *et al.* Personalised exercise therapy and self-  
22 management support for people with multimorbidity: feasibility of the MOBILIZE  
23 intervention. *Pilot Feasibility Stud* 2023;**9**:12. doi:10.1186/s40814-023-01242-0  
24  
25  
26  
27 44 Swaithe L, Paskins Z, Finney A. Factors influencing the implementation of evidence-  
28 based guidelines for osteoarthritis in primary care : A systematic review and thematic  
29 synthesis. *Musculoskeletal Care* 2020;**18**:101–10. doi:10.1002/msc.1452  
30  
31  
32  
33 45 Whiteley R, Napier C, van Dyk N, *et al.* Clinicians use courses and conversations to  
34 change practice, not journal articles: is it time for journals to peer-review courses to  
35 stay relevant? *Br J Sports Med* 2021;**55**:651 LP – 652. doi:10.1136/bjsports-2020-  
36 102736  
37  
38  
39  
40 46 Lineker SC, Bell MJ, Boyle J, *et al.* Implementing arthritis clinical practice guidelines in  
41 primary care. *Med Teach* 2009;**31**:230–7. doi:10.1080/01421590802158377  
42  
43  
44 47 Johansson M, Guyatt G, Montori V, *et al.* Guidelines should consider clinicians ' time  
45 needed to treat. *Br Med J* 2023;**380**. doi:10.1136/bmj-2022-072953  
46  
47  
48  
49  
50  
51  
52  
53  
54  
55  
56  
57  
58  
59  
60

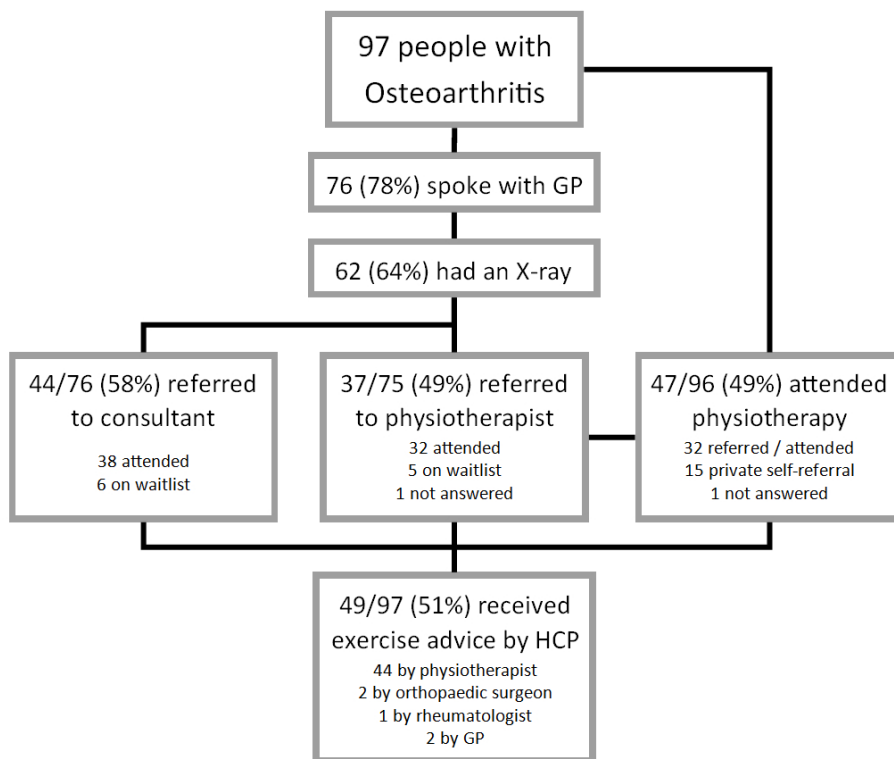

Figure 1. Flow chart of referral patterns for people with osteoarthritis.

605x459mm (47 x 47 DPI)

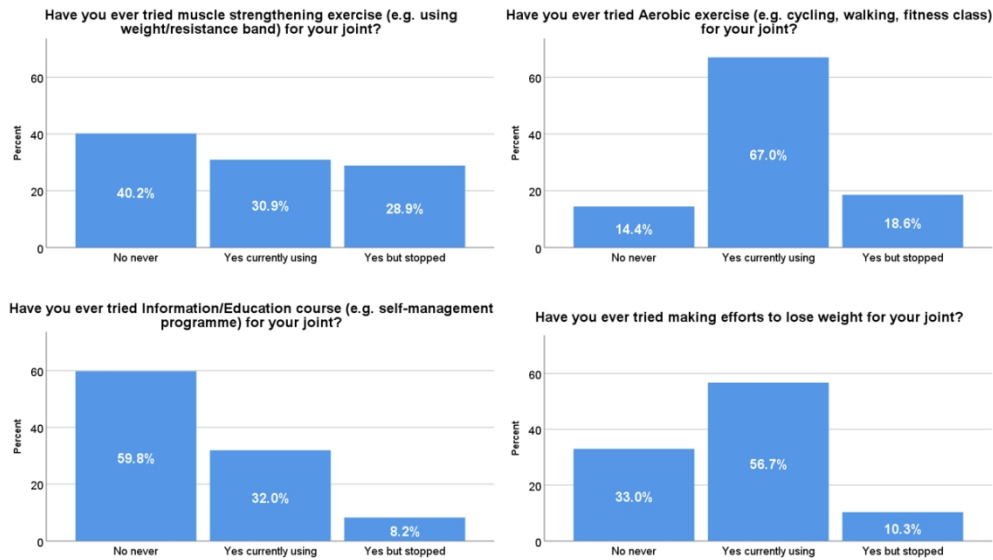

Figure 2. Proportion of responses to guideline-based treatments people with osteoarthritis (n=97) have tried.

680x385mm (47 x 47 DPI)

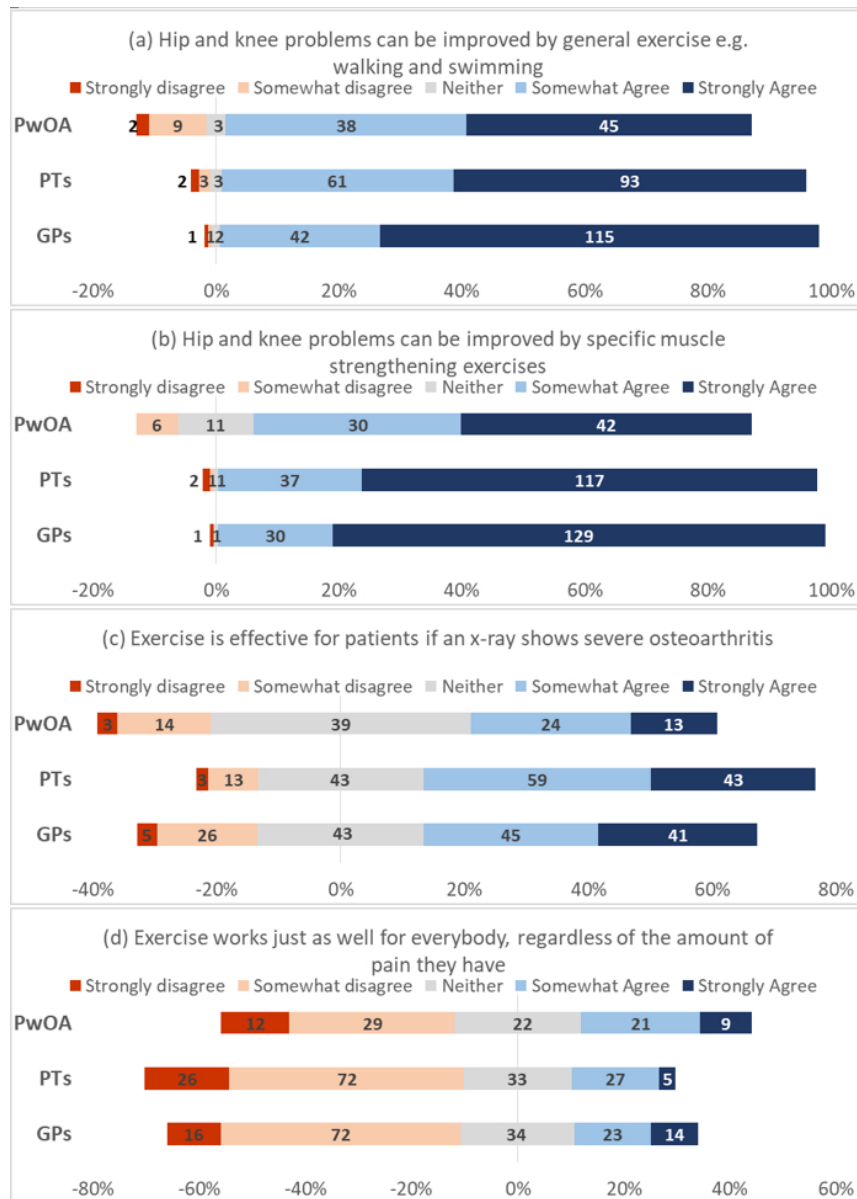

Figure 3. 100% stacked bar chart showing Likert scale results with count for each stakeholder on belief statements (a-d) related to exercise effectiveness. GP, general practitioner; PT, physiotherapist; PwOA, people with osteoarthritis.

377x526mm (47 x 47 DPI)

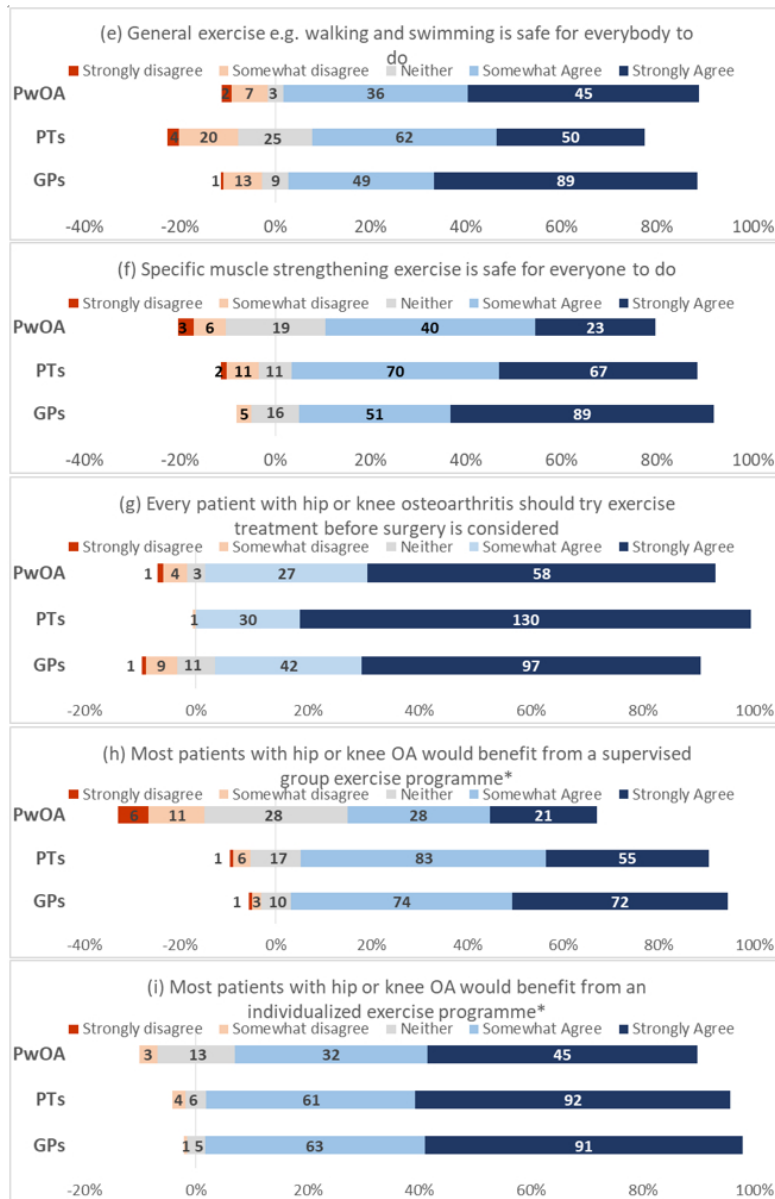

Figure 4. 100% stacked bar chart showing Likert scale results with count for each stakeholder on belief statements (e-i) related to exercise safety and delivery. \*Questions for PwOA phrased slightly differently: "The best way to learn about exercise is in a supervised group setting with people who have similar pain" and "The best way to learn about exercise is in a one-on-one setting with a health professional". GP, general practitioner; PT, physiotherapist; PwOA, people with osteoarthritis

354x545mm (47 x 47 DPI)

**Supplemental File 1**

Guideline-based exercise management for hip and knee osteoarthritis: differences in healthcare professional and patient beliefs

## **Survey 1: Beliefs, Barriers and Enablers to Exercise Prescription for Hip and Knee Osteoarthritis in General Practice in Ireland**

Instructions for completing this questionnaire

- When completing the questionnaire, please try and provide answers that most accurately reflect your usual clinical practice. There are no 'correct' or 'incorrect' answers.
- Please do not consult any literature while completing this questionnaire.

### **Section 1. Information about you**

1. How long have you been qualified as a General Practitioner?
  - Less than 5 years experience
  - 5-10 years experience
  - Greater than 10 years experience
2. How many GP's work in your practice (including yourself)
3. Are you:  Female  Male  Other  Prefer not to disclose
4. Is your primary practice:  urban  rural  mixed
5. Is your practice:
  - Primary care reimbursement scheme only
  - Private practice only
  - Mixed
6. Since graduating from University, do you remember receiving any specific postgraduate training in musculoskeletal (MSK) which contained education about hip or knee osteoarthritis or chronic pain? (By this we do not mean clinical placements or jobs in rheumatology or orthopaedics)
  - Yes  No
  - If yes, what type of training?
    - CME small groups (or guest speaker)
    - Diploma in MSK
    - M.Sc. in Sports & Exercise Medicine
    - Sports Medicine Faculty conferences
    - Private Hospital Day Course
    - Therapeutic Intra Articular and Soft Tissue Injection and Assessment Course
    - Specific Modules on MSK on your GP training Scheme
    - Other \_\_\_\_\_
7. How would you rate your confidence in treating hip and knee osteoarthritis?
  - Not confident
  - Slightly confident
  - Confident
  - Very confident
  - Extremely confident
8. Do you have, or have you ever suffered from chronic knee or hip pain yourself?
  - Yes  No
9. What percentage of your typical caseload is made up of patients with hip and/or knee pain?
  - 1-5%  6-25%  26-50%  51-75%  >75%

### **Section 2. Exercise beliefs for hip and knee osteoarthritis**

2.1 Where do you get your knowledge of care advancements for persons with knee or hip osteoarthritis? (Tick all that apply)

- Published guidelines or recommendations (e.g. NICE, EULAR, OARSI)
- Reading medical journals
- Twitter or other social media
- Podcasts
- CME networks or other GP networks
- Conference attendance
- Course attendance



**Supplemental File 1**

Guideline-based exercise management for hip and knee osteoarthritis: differences in healthcare professional and patient beliefs

Other \_\_\_\_\_

**We are interested in your views about the role of exercise in the treatment of hip and knee osteoarthritis. Please indicate the extent to which you agree or disagree with the statements given by ticking or placing an 'X' in one box per row.**

| Question                                                                                                                         | Strongly Disagree | Disagree | Neutral | Agree | Strongly Agree |
|----------------------------------------------------------------------------------------------------------------------------------|-------------------|----------|---------|-------|----------------|
| 2.2 Hip and knee problems are improved by general exercise e.g. walking and swimming                                             |                   |          |         |       |                |
| 2.3 Hip and knee problems are improved by specific muscle strengthening exercises                                                |                   |          |         |       |                |
| 2.4 General exercise e.g. walking and swimming is safe for everybody to do                                                       |                   |          |         |       |                |
| 2.5 Specific muscle strengthening exercise is safe for everyone to do                                                            |                   |          |         |       |                |
| 2.6 Every patient with hip or knee OA should try conservative exercise treatment before more invasive procedures are recommended |                   |          |         |       |                |
| 2.7 Exercise for hip or knee OA is most beneficial when it is tailored to meet individual patient needs                          |                   |          |         |       |                |
| 2.8 A standard set of exercises is sufficient for every patient with hip or knee OA                                              |                   |          |         |       |                |
| 2.9 Education on lifestyle change is important for patients with OA                                                              |                   |          |         |       |                |
| 2.10 Education on strategies for self-management of pain are important for patients with OA                                      |                   |          |         |       |                |
| 2.11 It is important that people with OA increase their overall activity levels                                                  |                   |          |         |       |                |
| 2.12 Exercise is effective for patients if an x-ray shows severe knee osteoarthritis                                             |                   |          |         |       |                |
| 2.13 Exercise for OA is more effectively provided by physiotherapists than GPs                                                   |                   |          |         |       |                |
| 2.14 Time constraints prevent the provision of advice on individual exercises for OA                                             |                   |          |         |       |                |
| 2.15 Exercise for OA should preferably be used after drug treatment has been tried                                               |                   |          |         |       |                |
| 2.16 Exercise for chronic knee pain would be used more frequently if access to physiotherapy was easier                          |                   |          |         |       |                |

**Section 3. Clinical scenario of a patient with osteoarthritis**

Presented below is a clinical scenario of a patient with suspected knee osteoarthritis who presents to you with this problem for the first time. All questions in this section relate to the care you would give this particular

**Patient:** Mrs. Murphy, 60-year old shop owner, no health insurance  
**Complaint:** Right sided knee pain  
**History:** Gradually worsening over 3 years  
 No history of trauma  
 Pain when walking and at rest, worst when climbing stairs.  
 No night pain.  
 Activities of daily living are manageable. Difficulty gardening.  
 Finding work increasingly difficult due to the stairs  
 Tried going to gym but stopped – thinks was making pain worse.  
 Otherwise well – mild hypertension  
 Has tried ibuprofen with no effect  
**Medication:** Amlodipine  
**Examination:** Mild Obesity with Body Mass Index of 33  
 Knees – bilaterally no effusions.  
 Joint line tenderness on palpation.  
 No pain or reduced mobility around knee cap  
 Slightly reduced flexion of the right knee.  
 Hips – no abnormality detected

patient.

**Supplemental File 1**

Guideline-based exercise management for hip and knee osteoarthritis: differences in healthcare professional and patient beliefs

3.1 Select some **key words** you would use to describe their diagnosis **to the patient**. (Select all that apply)

- |                                        |                                             |                                           |
|----------------------------------------|---------------------------------------------|-------------------------------------------|
| <input type="checkbox"/> Mild          | <input type="checkbox"/> Cartilage thinning | <input type="checkbox"/> Fear avoidance   |
| <input type="checkbox"/> Moderate      | <input type="checkbox"/> Overloading        | <input type="checkbox"/> Pain sensitivity |
| <input type="checkbox"/> Severe        | <input type="checkbox"/> Overweight         | <input type="checkbox"/> Bone on bone     |
| <input type="checkbox"/> Degeneration  | <input type="checkbox"/> Deterioration      | <input type="checkbox"/> Weakness         |
| <input type="checkbox"/> Wear and tear | <input type="checkbox"/> Normal ageing      | <input type="checkbox"/> Joint swelling   |
| <input type="checkbox"/> Arthritis     | <input type="checkbox"/> Joint damage       | Other _____                               |

3.2 What investigation(s)/assessment(s), if any, would you do/order for this patient at this point

- None    Knee x-ray    Blood tests    Other \_\_\_\_\_

3.3 At this consultation, what approaches would you use, or suggest, to manage this patient? (please tick all that apply)

- |                                                    |                                                   |                                                  |
|----------------------------------------------------|---------------------------------------------------|--------------------------------------------------|
| <input type="checkbox"/> None                      | <input type="checkbox"/> Advice on footwear       | <input type="checkbox"/> Exercise                |
| <input type="checkbox"/> Ice                       | <input type="checkbox"/> General activity         | <input type="checkbox"/> Injection of steroids   |
| <input type="checkbox"/> Heat                      | <input type="checkbox"/> Provision of walking aid | <input type="checkbox"/> Oral NSAID              |
| <input type="checkbox"/> Rest                      | <input type="checkbox"/> Weight Loss              | <input type="checkbox"/> Topical NSAID           |
| <input type="checkbox"/> Weak opioids              | <input type="checkbox"/> Paracetamol              | <input type="checkbox"/> Glucosamine/Chondroitin |
| <input type="checkbox"/> Other, please state _____ |                                                   |                                                  |

3.4 If you selected exercise above, what form would this take? (Select all that apply)

- Suggest general exercise and activity  
 Suggest specific exercises  
 Give a leaflet or online resource  
 Refer to physiotherapy or other exercise specialist  
 Other (please state) \_\_\_\_\_

3.5 In an ideal world without barriers, would you refer the patient to physiotherapy or orthopaedic consultant or neither, at this stage?

- Physiotherapy  
 Orthopaedic consultant  
 Neither

3.6 In your current practice, would you refer this patient to physiotherapy at this stage?

- Yes  
 No

If yes, why? (Select all that apply)

- Deemed an appropriate candidate for supervised conservative treatment  
 Ease of access to physiotherapy  
 Lack of time to appropriately address exercise needs in practice  
 Lack of response to NSAIDS  
 Other \_\_\_\_\_

If no, why not? (Select all that apply)

- Not an appropriate candidate for conservative treatment  
 Long waiting lists and poor access to physiotherapy  
 Other interventions are a priority  
 Exercise will make the pain worse  
 Patient has tried exercise  
 I would prefer to examine further therapeutic options first (e.g., develop a pain management plan or give an intra articular steroid injection)  
 Other \_\_\_\_\_

3.7 In your current practice, would you refer this patient to an orthopaedic consultant at this stage?

- Yes  
 No

If yes, why? (Select all that apply)

- Deemed an appropriate candidate for surgery right now

**Supplemental File 1**

Guideline-based exercise management for hip and knee osteoarthritis: differences in healthcare professional and patient beliefs

- Will likely need a joint replacement in a few years so put on waiting list now  
 Need a specialist opinion  
 Other \_\_\_\_\_

If no, why not? (Select all that apply)

- More conservative treatments have not been exhausted  
 Symptoms not severe enough to warrant joint replacement  
 Waiting list too long  
 Other \_\_\_\_\_

3.8 Would you refer the patient to see someone else, either in the primary or community team or into secondary care, at this point?

- Yes  
 No  
 If yes, who? \_\_\_\_\_

**Section 4. Barriers and enablers to exercise prescription and referral in general practice**

In your practice and experience of treating patients with osteoarthritis, what are the main barriers to exercise prescription or referral? (Please select all that apply)

- Insufficient time in consultation  
 Insufficient expertise  
 Uncertainty about the effects of exercise  
 Uncertainty about the most appropriate exercise type  
 Uncertainty about the safety of exercise  
 Cost and accessibility of physiotherapy for patient  
 Physiotherapy waiting lists are too long  
 Lack of a standardized physiotherapy programme for OA in the region  
 Patients prefer other management options  
 Patients want an orthopaedic consultant referral  
 English language barrier for patients  
 Severity of disease (symptoms too mild)  
 Severity of disease (symptoms too severe)  
 Older age of patient  
 Presence of many comorbidities  
 Other \_\_\_\_\_

What enablers would help you to prescribe or refer a patient with osteoarthritis to exercise in your practice?

- Increased formal post-qualification education e.g. diploma or masters  
 Increased post-qualification training e.g. workshops, videos  
 Increased exercise education during GP training  
 More consultation time to provide exercise prescription  
 Shorter waiting lists and improved access to physiotherapy  
 Presence of an evidence-based physiotherapy-supervised group exercise programme for osteoarthritis in the locality  
 Patients who recognize the importance of strategies for self-management of pain using appropriate exercise recommendations  
 Low cost community-based exercise programmes  
 Remuneration for exercise prescription and follow up consultations  
 Other \_\_\_\_\_

**Thank you for taking the time to complete this questionnaire. Your time and participation is greatly appreciated.**

**Supplemental File 1**

Guideline-based exercise management for hip and knee osteoarthritis: differences in healthcare professional and patient beliefs

## **Survey 2: Beliefs, Barriers and Enablers to Group Exercise Programme Delivery for Hip and Knee Osteoarthritis in Physiotherapy Practice in Ireland**

The questionnaire is divided into 3 sections and should take approximately **7 minutes** to complete.

Instructions for completing this questionnaire

- When completing the questionnaire, please try and provide answers that most accurately reflect your usual clinical practice. There are no 'correct' or 'incorrect' answers.
- Please do not consult any literature while completing this questionnaire.

**Section 1. Information about you**

- How long have you been qualified as a Physiotherapist?
  - Less than 5 years experience
  - 5-10 years experience
  - Greater than 10 years experience
- How many Physiotherapists work in your clinic (including yourself) \_\_\_\_\_
- Are you:  Female  Male  Other  Prefer not to disclose
- Is your primary work setting:
  - Public hospital
  - Private hospital
  - Primary, community and continuing care
  - Private practice clinic
  - Education
  - Other (please state) \_\_\_\_\_
- Have you undertaken any specific post-qualification training, which involved education about hip or knee osteoarthritis or chronic pain? (By this we do not mean clinical placements or jobs in rheumatology or orthopaedics)  Yes  No
 

If yes, what type of training? (Provide additional details if you wish to expand)

  - In-service training Additional details \_\_\_\_\_
  - M.Sc. (taught) in this/similar field Additional details \_\_\_\_\_
  - M.Sc. (research) in this/similar field Additional details \_\_\_\_\_
  - PhD in this/similar field Additional details \_\_\_\_\_
  - Day, weekend or online course (please name most relevant) \_\_\_\_\_
  - Other \_\_\_\_\_
- How would you rate your confidence in treating hip and knee osteoarthritis?
  - Not confident
  - Slightly confident
  - Confident
  - Very confident
  - Extremely confident
- Do you have, or have you ever suffered from chronic knee or hip pain yourself?  Yes  No
- What percentage of your typical caseload is made up of patients with hip and/or knee osteoarthritis?
  - 1-5%  6-25%  26-50%  51-75%  >75%

**Section 2. Exercise beliefs for hip and knee osteoarthritis**

2.1 Where do you access your knowledge of management for persons with knee or hip osteoarthritis? (Tick all that apply)

- Published guidelines or recommendations (e.g. NICE, EULAR, OARSI)
- Clinic protocols, discussion with peers or in-services
- Reading published research articles
- Twitter or other social media
- Podcasts
- Blogs
- Infographics
- Videos
- ISCP specialist groups and other network events
- Conference attendance
- Course attendance

**Supplemental File 1**

Guideline-based exercise management for hip and knee osteoarthritis: differences in healthcare professional and patient beliefs

Other \_\_\_\_\_

Please now rank in order your preferred resources to learn from

**We are interested in your views about the role of exercise in the treatment of hip and knee osteoarthritis. Please indicate the extent to which you agree or disagree with the statements given by ticking one box per row.**

| Question                                                                                                           | Strongly Disagree | Disagree | Neutral | Agree | Strongly Agree |
|--------------------------------------------------------------------------------------------------------------------|-------------------|----------|---------|-------|----------------|
| 2.2 Hip and knee problems are improved by general exercise e.g. walking and swimming                               |                   |          |         |       |                |
| 2.3 Hip and knee problems are improved by specific muscle strengthening exercises                                  |                   |          |         |       |                |
| 2.4 Hip and knee problems are improved by focusing on motor or neuromuscular control of the joints during exercise |                   |          |         |       |                |
| 2.5 General exercise e.g. walking and swimming is safe for most patients to do                                     |                   |          |         |       |                |
| 2.6 Specific muscle strengthening exercise is safe for most patients to do                                         |                   |          |         |       |                |
| 2.7 Neuromuscular control exercises are safe for most patients to do                                               |                   |          |         |       |                |
| 2.8 Every patient with hip or knee OA should try conservative exercise treatment before surgery is considered      |                   |          |         |       |                |
| 2.9 Exercise for hip or knee OA is most beneficial when it is tailored to meet individual patient needs            |                   |          |         |       |                |
| 2.10 A standard set of exercises with individual progression is sufficient for every patient with hip or knee OA   |                   |          |         |       |                |
| 2.11 Education on lifestyle change is important for patients with OA                                               |                   |          |         |       |                |
| 2.12 Education on strategies for self-management of pain are important for patients with OA                        |                   |          |         |       |                |
| 2.13 It is important that people with OA increase their overall activity levels                                    |                   |          |         |       |                |
| 2.14 Exercise is effective for patients if an x-ray shows severe knee osteoarthritis                               |                   |          |         |       |                |
| 2.15 Most patients with hip or knee OA would benefit from a supervised group exercise programme                    |                   |          |         |       |                |
| 2.16 Most patients with hip or knee OA would benefit from an individualized exercise programme                     |                   |          |         |       |                |

**Section 3. Barriers and enablers to exercise programme delivery in physiotherapy practice**

3.1 Please select the current level of government COVID19 restrictions in place as you are completing this survey

Level 1     Level 2     Level 3     Level 4     Level 5

3.2 **Pre-COVID19** restrictions in March 2020, were you or your clinic providing **group exercise classes** for patients with hip or knee osteoarthritis?  Yes  No

If Yes, what was the average number of classes per week? \_\_\_\_\_

If No, were you interested in offering group exercise classes for osteoarthritis in an ideal world and **if no barriers** existed?

Yes

No

**Supplemental File 1**

Guideline-based exercise management for hip and knee osteoarthritis: differences in healthcare professional and patient beliefs

3.3 **Pre-COVID19** restrictions in March 2020, **what** were the main **barriers** to providing group exercise programmes for patients with osteoarthritis in your practice? (Please select all that apply)

- None
- Insufficient space and equipment resources
- Insufficient personnel (staff) resources
- Insufficient referrals or low OA caseload
- Patients want individualized programmes
- Patients prefer other management options e.g. manual therapy
- Insufficient expertise
- Uncertainty about the effects of exercise
- Uncertainty about the most appropriate exercise type
- Uncertainty about the safety of exercise
- Cost for patient
- Access for patient (e.g. travel, parking, time)
- Scheduling conflict related to patient working hours and clinic hours
- Lack of a standardised programme or protocol for exercise for OA
- English language barrier for patients
- Lack of support from colleagues or managers
- Other \_\_\_\_\_

3.4 Are you currently offering **group exercise classes** for patients with hip or knee osteoarthritis and **to what capacity**?

- Yes, face to face at full capacity
- Yes, face to face at reduced capacity compared to Pre-COVID19 restrictions
- Yes, online classes only
- Yes, combination of face-to-face and online
- No

3.5 **Under current restrictions**, are there any **additional barriers** to providing **face-to-face** group exercise programmes for patients with osteoarthritis in your practice? (Please select all that apply)

- None
- Government restrictions currently do not allow for group classes
- Hospital or clinic protocols currently do not allow for group classes
- Patients do not want to attend clinic
- Not enough resources for adequate distancing for class members
- Sanitization procedures are too time consuming
- Own COVID-related safety concerns
- Other \_\_\_\_\_

3.6 **Under current restrictions**, are there any **additional barriers** to providing **online** group exercise programmes for patients with osteoarthritis in your practice? (Please select all that apply)

- None
- Lack of IT resources in clinic (e.g. online platform, webcams, high speed Wi-Fi)
- Lack of personnel (staff) with IT knowledge
- Patients lack IT resources or knowledge
- Patients prefer to wait until they can access face-to-face treatment
- Uncertainty about the effectiveness of online group exercise
- Own personal preference
- Other \_\_\_\_\_

3.7 What **enablers** would help you to provide **face to face group exercise** classes to patients with osteoarthritis in your practice if COVID restrictions were not a factor? (Please select all that apply)

- None
- More university post-qualification education e.g. diploma or masters
- More other post-qualification training e.g. short courses, workshops, videos
- More education on group exercise delivery during physiotherapy training
- Appropriate referrals from GP or other sources
- GPs who impart knowledge regarding benefits of exercise to patients upon referral

**Supplemental File 1**

1 Guideline-based exercise management for hip and knee osteoarthritis: differences in healthcare  
2 professional and patient beliefs

- 3  Resources to deliver quality educational material regarding self-management alongside exercise  
4  More support from colleagues or managers  
5  Other \_\_\_\_\_  
6

7 3.8 What **enablers** would help you to provide an option of **online** group exercise classes to patients with  
8 osteoarthritis in your practice? (Please select all that apply)

- 9  None  
10  Improved IT infrastructure in clinic (e.g. laptops, webcams)  
11  IT skills resources for delivering online programmes (e.g. tutorials, do's and don'ts)  
12  Access to IT resources (e.g. tutorials) to provide patients with  
13  Improved Wi-Fi and bandwidth nationwide  
14  Strong evidence for effectiveness of existing online programmes  
15  An online registry allowing collection of patient outcomes pre- and post- programme  
16  Other \_\_\_\_\_  
17

18 3.9 Would you be interested in receiving **training** (1.5 day workshop) to effectively implement and deliver a  
19 standardized, international, evidence-based group exercise and education programme with online and face-  
20 to-face options for patients with osteoarthritis in your clinic?

- 21  Extremely interested  
22  Very interested  
23  Moderately interested  
24  Slightly interested  
25  Not at all interested

26 If not interested, why? \_\_\_\_\_  
27

28 3.10 If interested, how much would you be willing to pay for this continuous professional development training?

- 29  €100-150  
30  €151-200  
31  €201-250  
32  €251-300  
33  €301-350  
34  More than €350  
35  N/A  
36  
37

38 **Thank you for taking the time to complete this questionnaire. Your time and participation is greatly**  
39 **appreciated.**  
40  
41  
42  
43  
44  
45  
46  
47  
48  
49  
50  
51  
52  
53  
54  
55  
56  
57  
58  
59  
60

**Supplemental File 1**

Guideline-based exercise management for hip and knee osteoarthritis: differences in healthcare professional and patient beliefs

**Survey 3: Survey on the Role of Exercise for Hip and Knee Osteoarthritis in Adults in Ireland**

The questions below are divided into 3 sections. Please complete the questions to the best of your ability.

**Section 1. Information about you**

1. Are you:  Female  Male  Other  Prefer not to disclose
2. Which age category do you fall into?
  - 30 to 39 years
  - 40 to 49 years
  - 50 to 59 years
  - 60 to 69 years
  - 70 to 79 years
  - 80 to 89 years
  - 90 years or older
3. Which province in Ireland do you reside in?  Munster  Ulster  Connacht  Leinster  
**\*\*If "Ulster" is selected, question 3(b) will appear.**  
 3(b) Do you access your healthcare in:
  - Northern Ireland (NHS)
  - Republic of Ireland (HSE)
  - A combination of both
4. Which of the following best describes where you live?
  - Inner city
  - Suburb of a city
  - Town
  - Village
  - Open country
  - Island off Ireland
5. Have you ever been told by a health professional that you have a diagnosis of the following?(Select all that apply)
 

|                                                                   |                                                                     |
|-------------------------------------------------------------------|---------------------------------------------------------------------|
| <input type="checkbox"/> Arthritis                                | <input type="checkbox"/> Diabetes Mellitus (type 1 or 2)            |
| <input type="checkbox"/> Osteoarthritis                           | <input type="checkbox"/> Kidney or liver disease                    |
| <input type="checkbox"/> Wear and tear                            | <input type="checkbox"/> Anemia (reduced number of red blood cells) |
| <input type="checkbox"/> Degenerative changes                     | <input type="checkbox"/> Other blood disease                        |
| <input type="checkbox"/> Rheumatoid arthritis                     | <input type="checkbox"/> Cancer                                     |
| <input type="checkbox"/> Hypertension                             | <input type="checkbox"/> Depression                                 |
| <input type="checkbox"/> Heart Disease                            | <input type="checkbox"/> Anxiety                                    |
| <input type="checkbox"/> Ulcer or other bowel diseases            | <input type="checkbox"/> Other mental health disorder               |
| <input type="checkbox"/> Neurological disease e.g. Parkinson's/MS |                                                                     |
| <input type="checkbox"/> Respiratory diseases e.g. COPD           | <input type="checkbox"/> Thyroid Disease                            |
| <input type="checkbox"/> Hemochromatosis                          | <input type="checkbox"/> Fibromyalgia                               |
| <input type="checkbox"/> Other health condition _____             |                                                                     |
6. Have you had pain and joint symptoms in any of the following joints for **6 months or more** (select all that apply)
 

|                                             |                                                       |
|---------------------------------------------|-------------------------------------------------------|
| <input type="checkbox"/> Right Knee         | <input type="checkbox"/> Left Knee                    |
| <input type="checkbox"/> Right Hip          | <input type="checkbox"/> Left Hip                     |
| <input type="checkbox"/> Right Ankle        | <input type="checkbox"/> Left Ankle                   |
| <input type="checkbox"/> Right Shoulder     | <input type="checkbox"/> Left Shoulder                |
| <input type="checkbox"/> Right Elbow        | <input type="checkbox"/> Left Elbow                   |
| <input type="checkbox"/> Right Wrist        | <input type="checkbox"/> Left Wrist                   |
| <input type="checkbox"/> Right Hand/Fingers | <input type="checkbox"/> Left Hand/Fingers            |
| <input type="checkbox"/> Lower Back         | <input type="checkbox"/> Other, please describe _____ |
| <input type="checkbox"/> Mid Back           |                                                       |
| <input type="checkbox"/> Neck               |                                                       |
7. Have you ever had joint replacement surgery for any of your painful joints? Please select below the joints that have been replaced.
 

|                                         |                                        |
|-----------------------------------------|----------------------------------------|
| <input type="checkbox"/> Right Knee     | <input type="checkbox"/> Left Knee     |
| <input type="checkbox"/> Right Hip      | <input type="checkbox"/> Left Hip      |
| <input type="checkbox"/> Right Ankle    | <input type="checkbox"/> Left Ankle    |
| <input type="checkbox"/> Right Shoulder | <input type="checkbox"/> Left Shoulder |



**Supplemental File 1**

Guideline-based exercise management for hip and knee osteoarthritis: differences in healthcare professional and patient beliefs

- Right Elbow                       Left Elbow  
 Right Wrist                       Left Wrist  
 Right Hand/Fingers               Left Hand/Fingers  
 Other, please describe \_\_\_\_\_

8. Of your hip and/or knee joints that have **NOT** been replaced, which joint are you most bothered by? (select one)

- Right Knee                       Left Knee  
 Right Hip                       Left Hip

**All remaining questions will now be related to the joint that you have chosen.**

9. How long have you been experiencing pain in your [insert chosen joint]?

- 6 months – 1 year  
 1 – 2 years  
 2 – 3 years  
 3 – 4 years  
 4 – 5 years  
 More than 5 years

10. Have you seen or spoken to your GP about your painful [insert chosen joint]?  Yes  No

11. Have you ever had an x-ray of your [insert chosen joint]?  Yes  No

12. Has your GP ever referred you to an **orthopaedic consultant** for your [insert chosen joint]?

- Yes  
 No  
 Currently on a waiting list (private consultant referral)  
 Currently on a waiting list (public consultant referral)

\*\* If on a waiting list, how long have you been waiting?

- Less than 6 months  
 6 months – 1 year  
 1 year – 1.5 years  
 1.5 years – 2 years  
 More than 2 years

13. Has your GP ever referred you to a **physiotherapist** for your [insert chosen joint]?

- Yes  
 No  
 Currently on a waiting list (private consultant referral)  
 Currently on a waiting list (public consultant referral)

\* If on a waiting list, how long have you been waiting?

- Less than 6 months  
 6 months – 1 year  
 1 year – 1.5 years  
 1.5 years – 2 years  
 More than 2 years

14. How would you rate the pain and symptoms you are experiencing in your hip and/or knee on an average day?

- No pain or symptoms  
 Mild pain and symptoms  
 Moderate pain and symptoms  
 Severe pain and symptoms

15. Have you EVER tried any of the following specifically for your [insert chosen joint]?

Muscle strengthening exercise

(e.g. using weight/resistance band)  No, never               Yes, currently using               Yes, stopped using

Aerobic exercise

(e.g. cycling, walking, fitness class)  No, never               Yes, currently using               Yes, stopped using

Information/Education course

(e.g. self-management programme)  No, never               Yes, currently using               Yes, stopped using

Making efforts to lose weight

No, never               Yes, currently using               Yes, stopped using

**Supplemental File 1**

Guideline-based exercise management for hip and knee osteoarthritis: differences in healthcare professional and patient beliefs

**Section 2. Exercise beliefs for hip and knee osteoarthritis**

We are interested in your views about the role of exercise in the treatment of hip and knee osteoarthritis.

Please indicate how much you agree or disagree with the statements given by selecting one option per question.

| Question                                                                                                                                | Strongly Disagree | Disagree | Neutral | Agree | Strongly Agree |
|-----------------------------------------------------------------------------------------------------------------------------------------|-------------------|----------|---------|-------|----------------|
| 2.1 Hip and knee problems can be improved by general exercise e.g. walking and swimming                                                 |                   |          |         |       |                |
| 2.2 Hip and knee problems can be improved by specific muscle strengthening exercises                                                    |                   |          |         |       |                |
| 2.3 General exercise e.g. walking and swimming is safe for everybody to do                                                              |                   |          |         |       |                |
| 2.4 Specific muscle strengthening exercise is safe for everyone to do                                                                   |                   |          |         |       |                |
| 2.5 Every patient with hip or knee osteoarthritis should try exercise treatment before surgery is considered                            |                   |          |         |       |                |
| 2.6 Patients should learn more about how to self-manage their pain and symptoms using exercise and physical activity                    |                   |          |         |       |                |
| 2.7 The best way to learn about exercise is in a supervised group setting with people who have similar pain (Pre-COVID-19 restrictions) |                   |          |         |       |                |
| 2.8 The best way to learn about exercise is in a one-on-one setting with a health professional (Pre-COVID-19 restrictions)              |                   |          |         |       |                |
| 2.9 Exercise is effective for patients if an x-ray shows severe knee osteoarthritis                                                     |                   |          |         |       |                |
| 2.10 Exercise works just as well for everybody, regardless of the amount of pain they have                                              |                   |          |         |       |                |

**Section 3. Barriers and enablers to exercise for hip and knee osteoarthritis**

In this section we want to know more about your exercise experience and what kinds of things would prevent you or help you do more exercise

3.1 How many times a week do you exercise (e.g. 30 minute walk)?

- 3 or more days per week
- Less than 3 days per week
- I don't exercise

3.2 Has a health professional ever given you specific exercises for your [insert chosen joint]?

- Yes
- No
- Not sure
- \*If Yes, what type of health professional? (select all that apply)
- Physiotherapist
- GP
- Orthopaedic surgeon
- Nurse
- Personal trainer
- Other, please name \_\_\_\_\_

\*If Yes, what type of exercise?

- Home-based individual exercises
- Group exercise class for osteoarthritis
- Other, please state \_\_\_\_\_

\*If Yes, did you find the exercise beneficial?

- Yes
- No
- Not sure

3.3 Please select the current level of government COVID19 restrictions in place as you are completing this survey

**Supplemental File 1**

Guideline-based exercise management for hip and knee osteoarthritis: differences in healthcare professional and patient beliefs

Level 1       Level 2       Level 3       Level 4       Level 5 (strictest restrictions)

3.4 Thinking about life **without COVID19** restrictions, **what** are the main **barriers** that would prevent you from exercising? (Please select all that apply)

- Pain or other joint symptoms
- I need assistance for mobility e.g. walking stick, wheelchair
- Finding time to exercise
- Lack of enjoyment from exercise
- Lack of exercise buddy or support network
- Wet or cold weather
- Other health problems
- Other disability e.g. visual impairment
- Cost of a gym membership or physiotherapy visit
- Cost of active wear or equipment
- I don't know the best types of exercise to do
- I don't know who to contact to learn more or do more exercise
- Uncertainty about the safety of exercise for joint pain
- Uncertainty about the benefit of exercise for joint pain
- Negative body image
- Access to facilities (e.g. availability, travel, parking)
- Work commitments
- Family commitments or other responsibilities
- Age
- Fear of injury
- Tiredness and fatigue
- Depression
- Other \_\_\_\_\_

3.5 Thinking about life **without COVID19** restrictions, what types of things would **help you to exercise more?** (Please select all that apply)

- Better knowledge of the best type of exercise to do
- Access to exercise that is supervised by a health professional
- Social aspect e.g. group exercise with other people with hip or knee pain
- More confidence in your joint
- Exercise recommendations from a GP
- Exercise recommendations from a physiotherapist
- More support from family or friends
- Warm and dry weather for outdoor exercise
- Low cost community exercise programmes
- Safe exercise environment (e.g. well-lit pathways)
- Other \_\_\_\_\_

3.6 Thinking about life **without COVID-19**, how interested would you be in attending a 6-week, twice per week, physiotherapy-supervised group exercise and education class for your hip or knee pain **at a clinic or community centre?**

- Extremely interested
  - Very interested
  - Moderately interested
  - Slightly interested
  - Not at all interested
- If not interested, why? \_\_\_\_\_

3.7 Thinking about **current restrictions**, how interested would you be in taking part in a 6-week, twice per week, **ONLINE** physiotherapy-supervised group exercise and education class for you hip or knee pain?

- Extremely interested
- Very interested
- Moderately interested
- Slightly interested

**Supplemental File 1**

Guideline-based exercise management for hip and knee osteoarthritis: differences in healthcare professional and patient beliefs

Not at all interested

If not interested, why? \_\_\_\_\_

3.8 Do you have any experience with online-delivered healthcare or telerehabilitation from a GP or other health professional?

Yes

No

3.9 What are the **barriers** that would prevent you taking part in an **online exercise** class? (Please select all that apply)

Lack of technology equipment (e.g. laptop, smartphone or tablet, webcams)

Lack of confidence in using computers, laptops etc.

Wi-Fi / Broadband connection is not good enough

Preference to wait until I can access face-to-face treatment

Uncertain about how online group exercise would work

Lack of space in home environment to perform exercises

English language barriers

Lack of time to take part

Other \_\_\_\_\_

3.10 What would **help you** to take part in an **online** group exercise class with other people with osteoarthritis? (Please select all that apply)

An initial one-to-one session with a physiotherapist to get familiar with the process

Resources (e.g. videos) with explanations of how to get started

Improved Wi-Fi and bandwidth

Examples and testimonials from patients who have finished the classes

Opportunities to chat online with other patients before and after the class

Support from family members to get set up in your home

A laptop or tablet

Other \_\_\_\_\_

3.11 If interested, how much would you be willing to pay to take part in these exercise classes (price in euros for entire 14-15 session programme)?

€0-25

€26-50

€51-100

€101-150

€151-200

> €200

**Thank you for taking the time to complete this questionnaire. Your time and participation is greatly appreciated.**

**Supplemental File 2**

Guideline-based exercise management for hip and knee osteoarthritis: differences in healthcare professional and patient beliefs

**Supplemental Table:** Multivariable linear regression models to determine if positive beliefs about exercise in PwOA are associated with (1) referral to physiotherapist by a GP and (2) if they have seen a physiotherapist for their joint pain.

| <i>Dependent Variable: Number of exercise belief statements agreed with</i>       |          |             |                            |            |             |               |                          |              |
|-----------------------------------------------------------------------------------|----------|-------------|----------------------------|------------|-------------|---------------|--------------------------|--------------|
| <b>Variables Model 1<sup>a</sup></b>                                              | <b>B</b> | <b>S.E.</b> | <b>Partial Correlation</b> | <b>VIF</b> | <b>Sig.</b> | <b>Exp(B)</b> | <b>95% CI for EXP(B)</b> |              |
|                                                                                   |          |             |                            |            |             |               | <b>Lower</b>             | <b>Upper</b> |
| <i>Has your GP ever referred you to a physiotherapist for your painful joint?</i> | 0.700    | 0.400       | 0.187                      | 1.124      | 0.084       | 0.185         | -0.095                   | 1.496        |
| <i>Sex</i>                                                                        | -0.620   | 0.374       | -0.177                     | 1.015      | 0.101       | -0.166        | -1.363                   | 0.124        |
| <i>How long have you been experiencing pain in your joint?</i>                    | -0.163   | 0.100       | -0.174                     | 1.130      | 0.106       | -0.173        | -0.361                   | 0.035        |
| <i>Number of comorbidities</i>                                                    | -0.314   | 0.123       | 0.268                      | 1.027      | 0.012       | -0.259        | -0.557                   | -0.070       |
| <i>Constant</i>                                                                   | 7.687    | 0.604       | -                          | -          | 0.000       | -             | 6.485                    | 8.888        |
| <b>Model 2<sup>b</sup></b>                                                        |          |             |                            |            |             |               |                          |              |
| <i>Have you seen a physiotherapist for your painful joint?</i>                    | 1.060    | 0.383       | 0.288                      | 1.138      | 0.007       | 0.287         | 0.299                    | 1.821        |
| <i>Sex</i>                                                                        | -0.723   | 0.362       | -0.212                     | 1.003      | 0.049       | -0.194        | -1.444                   | -0.003       |
| <i>How long have you been experiencing pain in your joint?</i>                    | -0.204   | 0.099       | -0.219                     | 1.163      | 0.042       | -0.216        | -0.400                   | -0.008       |
| <i>Number of comorbidities</i>                                                    | -0.293   | 0.119       | -0.257                     | 1.026      | 0.016       | -0.241        | -0.530                   | -0.055       |
| <i>Constant</i>                                                                   | 7.680    | 0.585       | -                          | -          | 0.000       | -             | 6.034                    | 9.653        |

<sup>a</sup>Model variables removed due to non-significance (1): *How long have you been experiencing pain in your joint?*, *How would you rate the pain and symptoms you are experiencing in your hip and/or knee on an average day?*.

<sup>b</sup>Model variables removed due to non-significance (2): *How would you rate the pain and symptoms you are experiencing in your hip and/or knee on an average day?*. B, beta coefficient; GP, general practitioner; OA, osteoarthritis; PT, physiotherapist; PwOA, people with osteoarthritis; S.E., standard error; VIF, variance inflation factor.

STROBE Statement—Checklist of items that should be included in reports of *cross-sectional studies*

|                              | Item No | Recommendation                                                                                                                                                                                    | Page No |
|------------------------------|---------|---------------------------------------------------------------------------------------------------------------------------------------------------------------------------------------------------|---------|
| <b>Title and abstract</b>    | 1       | (a) Indicate the study's design with a commonly used term in the title or the abstract                                                                                                            | 1       |
|                              |         | (b) Provide in the abstract an informative and balanced summary of what was done and what was found                                                                                               | 1       |
| <b>Introduction</b>          |         |                                                                                                                                                                                                   |         |
| Background/rationale         | 2       | Explain the scientific background and rationale for the investigation being reported                                                                                                              | 3-4     |
| Objectives                   | 3       | State specific objectives, including any prespecified hypotheses                                                                                                                                  | 4       |
| <b>Methods</b>               |         |                                                                                                                                                                                                   |         |
| Study design                 | 4       | Present key elements of study design early in the paper                                                                                                                                           | 4-5     |
| Setting                      | 5       | Describe the setting, locations, and relevant dates, including periods of recruitment, exposure, follow-up, and data collection                                                                   | 4-5     |
| Participants                 | 6       | (a) Give the eligibility criteria, and the sources and methods of selection of participants                                                                                                       | 5       |
| Variables                    | 7       | Clearly define all outcomes, exposures, predictors, potential confounders, and effect modifiers. Give diagnostic criteria, if applicable                                                          | 5-6     |
| Data sources/<br>measurement | 8*      | For each variable of interest, give sources of data and details of methods of assessment (measurement). Describe comparability of assessment methods if there is more than one group              | 5-7     |
| Bias                         | 9       | Describe any efforts to address potential sources of bias                                                                                                                                         | n/a     |
| Study size                   | 10      | Explain how the study size was arrived at                                                                                                                                                         | n/a     |
| Quantitative variables       | 11      | Explain how quantitative variables were handled in the analyses. If applicable, describe which groupings were chosen and why                                                                      | 5-6     |
| Statistical methods          | 12      | (a) Describe all statistical methods, including those used to control for confounding                                                                                                             | 6-7     |
|                              |         | (b) Describe any methods used to examine subgroups and interactions                                                                                                                               | 6-7     |
|                              |         | (c) Explain how missing data were addressed                                                                                                                                                       | 7       |
|                              |         | (d) If applicable, describe analytical methods taking account of sampling strategy                                                                                                                | 6-7     |
|                              |         | (e) Describe any sensitivity analyses                                                                                                                                                             | n/a     |
| <b>Results</b>               |         |                                                                                                                                                                                                   |         |
| Participants                 | 13*     | (a) Report numbers of individuals at each stage of study—eg numbers potentially eligible, examined for eligibility, confirmed eligible, included in the study, completing follow-up, and analysed | 7       |
|                              |         | (b) Give reasons for non-participation at each stage                                                                                                                                              | 7       |
|                              |         | (c) Consider use of a flow diagram                                                                                                                                                                | n/a     |
| Descriptive data             | 14*     | (a) Give characteristics of study participants (eg demographic, clinical, social) and information on exposures and potential confounders                                                          | Table 1 |
|                              |         | (b) Indicate number of participants with missing data for each variable of interest                                                                                                               | Table 1 |

|                          |     |                                                                                                                                                                                                              |                       |
|--------------------------|-----|--------------------------------------------------------------------------------------------------------------------------------------------------------------------------------------------------------------|-----------------------|
| Outcome data             | 15* | Report numbers of outcome events or summary measures                                                                                                                                                         | Page 7,<br>Figure 1-3 |
| Main results             | 16  | (a) Give unadjusted estimates and, if applicable, confounder-adjusted estimates and their precision (eg, 95% confidence interval). Make clear which confounders were adjusted for and why they were included | Table 3               |
|                          |     | (b) Report category boundaries when continuous variables were categorized                                                                                                                                    | n/a                   |
|                          |     | (c) If relevant, consider translating estimates of relative risk into absolute risk for a meaningful time period                                                                                             | n/a                   |
| Other analyses           | 17  | Report other analyses done—eg analyses of subgroups and interactions, and sensitivity analyses                                                                                                               | n/a                   |
| <b>Discussion</b>        |     |                                                                                                                                                                                                              |                       |
| Key results              | 18  | Summarise key results with reference to study objectives                                                                                                                                                     | 14-15                 |
| Limitations              | 19  | Discuss limitations of the study, taking into account sources of potential bias or imprecision. Discuss both direction and magnitude of any potential bias                                                   | 18                    |
| Interpretation           | 20  | Give a cautious overall interpretation of results considering objectives, limitations, multiplicity of analyses, results from similar studies, and other relevant evidence                                   | 16,17                 |
| Generalisability         | 21  | Discuss the generalisability (external validity) of the study results                                                                                                                                        | 18                    |
| <b>Other information</b> |     |                                                                                                                                                                                                              |                       |
| Funding                  | 22  | Give the source of funding and the role of the funders for the present study and, if applicable, for the original study on which the present article is based                                                | 18                    |

\*Give information separately for exposed and unexposed groups.

**Note:** An Explanation and Elaboration article discusses each checklist item and gives methodological background and published examples of transparent reporting. The STROBE checklist is best used in conjunction with this article (freely available on the Web sites of PLoS Medicine at <http://www.plosmedicine.org/>, Annals of Internal Medicine at <http://www.annals.org/>, and Epidemiology at <http://www.epidem.com/>). Information on the STROBE Initiative is available at [www.strobe-statement.org](http://www.strobe-statement.org).

# BMJ Open

## Guideline-based exercise management for hip and knee osteoarthritis: a cross-sectional comparison of healthcare professional and patient beliefs in Ireland.

|                                 |                                                                                                                                                                                                                                                                                                                                                                                                                                                                                                                                                                                                                                                                                                                                                                                                                                                                                                                                                                                                                                                                                                                     |
|---------------------------------|---------------------------------------------------------------------------------------------------------------------------------------------------------------------------------------------------------------------------------------------------------------------------------------------------------------------------------------------------------------------------------------------------------------------------------------------------------------------------------------------------------------------------------------------------------------------------------------------------------------------------------------------------------------------------------------------------------------------------------------------------------------------------------------------------------------------------------------------------------------------------------------------------------------------------------------------------------------------------------------------------------------------------------------------------------------------------------------------------------------------|
| Journal:                        | <i>BMJ Open</i>                                                                                                                                                                                                                                                                                                                                                                                                                                                                                                                                                                                                                                                                                                                                                                                                                                                                                                                                                                                                                                                                                                     |
| Manuscript ID                   | bmjopen-2023-080646.R3                                                                                                                                                                                                                                                                                                                                                                                                                                                                                                                                                                                                                                                                                                                                                                                                                                                                                                                                                                                                                                                                                              |
| Article Type:                   | Original research                                                                                                                                                                                                                                                                                                                                                                                                                                                                                                                                                                                                                                                                                                                                                                                                                                                                                                                                                                                                                                                                                                   |
| Date Submitted by the Author:   | 05-Jun-2024                                                                                                                                                                                                                                                                                                                                                                                                                                                                                                                                                                                                                                                                                                                                                                                                                                                                                                                                                                                                                                                                                                         |
| Complete List of Authors:       | Toomey, Clodagh; University of Limerick, School of Allied Health; University of Limerick Health Research Institute<br>Bhardwaj, Avantika; University of Limerick, School of Allied Health; University of Limerick Health Research Institute<br>Browne, Jacqui; IMPACT Steering Committee, Patient Representative<br>Dowling, Ian; Ian Dowling Physiotherapy Clinic<br>Grealis, Stacey; IMPACT Steering Committee, Patient Representative; University College Dublin, Centre of Arthritis Research<br>Hayes, Peter; University of Limerick, School of Medicine; University of Limerick Health Research Institute<br>Higgins, Niall; University of Limerick, School of Allied Health<br>Maguire, Darragh; National Orthopaedic Hospital Cappagh, Physiotherapy Department<br>O’Hora, John; Health Service Executive, Community Healthcare West<br>Rector, Joseph; University of Limerick, School of Allied Health<br>Wood-Thornsbury, Arianna; University of Limerick, School of Allied Health<br>Kennedy, Norelee; University of Limerick, School of Allied Health; University of Limerick Health Research Institute |
| <b>Primary Subject Heading</b>: | Evidence based practice                                                                                                                                                                                                                                                                                                                                                                                                                                                                                                                                                                                                                                                                                                                                                                                                                                                                                                                                                                                                                                                                                             |
| Secondary Subject Heading:      | Rheumatology, Rehabilitation medicine, Patient-centred medicine                                                                                                                                                                                                                                                                                                                                                                                                                                                                                                                                                                                                                                                                                                                                                                                                                                                                                                                                                                                                                                                     |
| Keywords:                       | Physical Therapy Modalities, RHEUMATOLOGY, Protocols & guidelines < HEALTH SERVICES ADMINISTRATION & MANAGEMENT, Hip < ORTHOPAEDIC & TRAUMA SURGERY, Knee < ORTHOPAEDIC & TRAUMA SURGERY                                                                                                                                                                                                                                                                                                                                                                                                                                                                                                                                                                                                                                                                                                                                                                                                                                                                                                                            |
|                                 |                                                                                                                                                                                                                                                                                                                                                                                                                                                                                                                                                                                                                                                                                                                                                                                                                                                                                                                                                                                                                                                                                                                     |

SCHOLARONE™  
Manuscripts





I, the Submitting Author has the right to grant and does grant on behalf of all authors of the Work (as defined in the below author licence), an exclusive licence and/or a non-exclusive licence for contributions from authors who are: i) UK Crown employees; ii) where BMJ has agreed a CC-BY licence shall apply, and/or iii) in accordance with the terms applicable for US Federal Government officers or employees acting as part of their official duties; on a worldwide, perpetual, irrevocable, royalty-free basis to BMJ Publishing Group Ltd ("BMJ") its licensees and where the relevant Journal is co-owned by BMJ to the co-owners of the Journal, to publish the Work in this journal and any other BMJ products and to exploit all rights, as set out in our [licence](#).

The Submitting Author accepts and understands that any supply made under these terms is made by BMJ to the Submitting Author unless you are acting as an employee on behalf of your employer or a postgraduate student of an affiliated institution which is paying any applicable article publishing charge ("APC") for Open Access articles. Where the Submitting Author wishes to make the Work available on an Open Access basis (and intends to pay the relevant APC), the terms of reuse of such Open Access shall be governed by a Creative Commons licence – details of these licences and which [Creative Commons](#) licence will apply to this Work are set out in our licence referred to above.

Other than as permitted in any relevant BMJ Author's Self Archiving Policies, I confirm this Work has not been accepted for publication elsewhere, is not being considered for publication elsewhere and does not duplicate material already published. I confirm all authors consent to publication of this Work and authorise the granting of this licence.

1  
2  
3 **Guideline-based exercise management for hip and knee osteoarthritis: a cross-**  
4 **sectional comparison of healthcare professional and patient beliefs in Ireland.**  
5  
6  
7  
8

9 **ABSTRACT**

10  
11 **Objectives:** To identify within-stakeholder agreement and between-stakeholder differences  
12 in beliefs regarding exercise for osteoarthritis among general practitioners (GPs),  
13 physiotherapists (PTs) and people with hip and knee osteoarthritis (PwOA). A secondary  
14 objective was to explore the association between referral patterns and beliefs of PwOA.  
15  
16

17  
18 **Design:** Cross-sectional

19  
20  
21 **Setting:** Online surveys administered to GPs, PTs and PwOA in Ireland via social media  
22 and healthcare networks.  
23

24  
25 **Participants:** 421 valid responses (n=161 GPs, n=163 PTs, n=97 PwOA).

26  
27 **Primary and secondary outcome measures:** Nine beliefs statements related to exercise  
28 effectiveness, safety and delivery were rated on a 5-point Likert scale and analysed for  
29 within-stakeholder consensus. Chi-square tests assessed differences in agreement between  
30 groups. Multivariable linear regression models tested associations between beliefs in PwOA  
31 and referral to/attendance at physiotherapy.  
32  
33

34  
35 **Results:** Positive within-stakeholder consensus (>75% agreement) was reached for most  
36 statements (7/9 GPs, 6/9 PTs, 5/9 PwOA). However, beliefs of PwOA were significantly less  
37 positive compared to healthcare professionals for six statements. All stakeholders disagreed  
38 that exercise is effective regardless of the level of pain. Attendance at physiotherapy (49% of  
39 PwOA), rather than referral to physiotherapy from a GP only, was associated with positive  
40 exercise beliefs for PwOA [ $\beta=0.287$  (95% CI 0.299, 1.821)].  
41  
42  
43  
44

45  
46 **Conclusions:** Beliefs about exercise therapy for osteoarthritis are predominantly positive  
47 across all stakeholders, albeit less positive in PwOA. PwOA are more likely to have positive  
48 beliefs if they have seen a physiotherapist for their osteoarthritis. Knowledge translation  
49 should highlight the effectiveness of exercise for all levels of pain and osteoarthritis disease.  
50  
51

52  
53  
54 **Strengths and Limitations**

- 55  
56  
57
  - Differences in beliefs about exercise between healthcare professionals and patients  
58 with osteoarthritis has not previously been examined.  
59  
60

- This study also explored how healthcare professional visits may influence beliefs about effectiveness of evidence-based care.
- This was a cross-sectional study so no inferences can be made.
- Different results with respect to beliefs and influences may have been found if non-online recruitment methods were available (e.g. paper surveys in healthcare settings).

For peer review only

## INTRODUCTION

The management of hip and knee osteoarthritis (OA), as for other chronic conditions, should be determined by best available evidence. Although there is no cure for this burdensome disease, healthcare professionals in this field have for a long time had a wealth of high-quality evidence to draw from, all pointing to optimal core clinical management that consists of land-based exercise, education and weight loss if appropriate[1,2]. Despite this, implementation of these guidelines in practice is not optimal, often resulting in care that is fragmented in nature or considered low-value [3]. A global meta-analysis involving 16,103 people with OA (PwOA) in community care, revealed that only 39% received a referral or recommendation to exercise,[4] while a UK-based survey in 2018 revealed that only 3.9% of the 502 respondents with an OA diagnosis, were using exercise as part of their management[5]. Some similarities in shortcomings to implementation of guidelines for musculoskeletal health have been identified globally[6].

Alongside use of best evidence, the provision of patient-centred care is a pillar of high-quality care that should help guide treatment for PwOA[7]. Literature and expert opinion recommendations state that it is important to assess patient ideas and concerns regarding the cause and management of their pain, and to take into account their expectations and preferences for treatment[7]. Regarding exercise, researchers have identified a considerable amount of uncertainty among PwOA regarding the benefits of exercise for their pain. Results from cross-sectional surveys and semi-structured interviews have indicated that a lack of knowledge on the condition may result in patients believing that surgery is their only option[8,9]. Furthermore, a view of OA as a “wear and tear” condition was associated with the perspective that exercise was a counterintuitive treatment[8–10]. Since it is widely understood that beliefs influence health-related behaviours [11,12], and because stronger recommendations for exercise have been made since previous publications[2,5,9], an updated understanding of how PwOA view exercise is required.

Healthcare professionals’ perceptions and beliefs will affect the advice and management they offer patients, and researchers have suggested that those with biomedical or biomechanical beliefs about OA may transfer these beliefs to their patients, thus affecting their treatment choices[13,14]. Currently, general practitioners (GPs) and physiotherapists (PTs) are considered among the core care providers for PwOA[15]. While PT’s have the knowledge and skills to adopt a key role in the management of hip and knee OA, GPs remain the most frequently accessed source of formal medical advice and treatment[15,16]. The language used by healthcare professionals, especially GPs, can have a profound influence on patients’ beliefs[17,18]. A systematic review from Cottrell et al [19] in 2010,

1  
2  
3 found that the attitudes and beliefs of GPs concerning exercise and chronic knee pain varied  
4 widely. An updated UK-based survey of GPs in 2017 found that perspectives were positive,  
5 with 87% reporting the use of exercise in their practice [16]. However, only 11% reported  
6 using exercise in ways that aligned with evidence-based guidelines [16]. This demonstrates  
7 the need for a better understanding of how GPs interact with up-to-date resources for care  
8 advancements for OA, in a time-demanding profession.  
9  
10  
11  
12

13 A scoping review of qualitative research exploring attitudes and beliefs, shows that PTs  
14 generally have a positive attitude to activity and exercise in OA management, despite  
15 indications that some PTs may also be lacking up-to-date knowledge about best practice or  
16 may not be adhering to evidence-based treatments[20]. In contrast, a recent mixed-methods  
17 evaluation by Barton et al [21] in 2021 reported that awareness regarding evidence  
18 supporting exercise for knee OA was good (89–96%) amongst PTs in Australia and Canada.  
19  
20  
21  
22

23 Greater knowledge around beliefs and belief influencers are needed in order to address  
24 negative beliefs or myths associated with exercise and joint pain. The objective of this study  
25 was to identify within-stakeholder agreement and between-stakeholder differences in beliefs  
26 in relation to statements on exercise for management of hip and knee OA in PwOA, GPs and  
27 PTs. Secondary objectives were to explore any associations between beliefs of PwOA and  
28 whether they had ever received a GP referral to physiotherapy or had seen a PT for their  
29 painful joint. Based on previous work [9,13,16], it was hypothesised that exercise beliefs of  
30 PTs would be more positive, and in line with clinical guidelines and latest evidence,  
31 compared to GPs and PwOA. It was also hypothesised that PwOA who had received a  
32 physiotherapy referral from their GP, or who had seen a PT for their condition would have  
33 more positive beliefs about exercise compared to those who had not. Finally, an exploration  
34 of common sources of education for GPs and PTs was included to understand how beliefs  
35 regarding evidence are influenced.  
36  
37  
38  
39  
40  
41  
42  
43  
44

## 45 **METHODS**

### 46 **Design and Recruitment**

47  
48  
49 This study incorporates an analysis of three cross-sectional online surveys administered to  
50 three stakeholder groups - GPs, PTs and PwOA – in Ireland between March and September  
51 2021. This cross-sectional study is embedded in a larger study (IMPACT – Implementation  
52 of osteoarthritis clinical guidelines together)[22], that aims to co-design and evaluate  
53 implementation strategies for an exercise and education programme for PwOA in Ireland.  
54 Surveys were adapted from previous studies in this field [9,13,16] and reviewed by co-  
55 researchers of a public and patient involvement (PPI) steering committee of representative  
56 stakeholders prior to distribution. Validation consisted of a round of pre-testing with a  
57  
58  
59  
60

1  
2  
3 convenience sample of three of each GPs, PTs and PwOA with feedback provided on  
4 readability, acceptability and appropriateness that was incorporated before distribution.  
5  
6 Qualtrics© software (Qualtrics, Provo, UT) was used to administer the online surveys and all  
7  
8 procedures were approved by the University of Limerick Faculty of Education & Health  
9  
10 Sciences Research Ethics Committee (REC) (2020\_12\_13\_EHS) and the Irish College of  
11  
12 General Practitioners REC (ICGP\_REC\_21\_0006). Surveys were completed anonymously  
13  
14 after participants were provided with a participant information sheet and consent was implied  
15  
16 by completion of the survey. Reporting is consistent with the Strengthening the Reporting of  
17  
18 Observational Studies in Epidemiology (STROBE) guidelines for cross-sectional studies.

18  
19 The PT survey was distributed via email invite to all members of the Irish Society of  
20  
21 Chartered Physiotherapists (n=2022), working across all fields. The survey was also  
22  
23 advertised via social media (Twitter, LinkedIn) and amongst networks of researchers and  
24  
25 PPI steering committee members. Physiotherapists were eligible for inclusion if they: (1)  
26  
27 were practicing in Ireland, and (2) treated a patient with hip or knee OA in the past six  
28  
29 months. The GP survey was distributed to the Irish College of General Practitioners network  
30  
31 (n=3152), the University of Limerick Education and Research Network for General Practice  
32  
33 (ULEARN-GP) network[23] (n=140) and via social media (Twitter, LinkedIn). GPs were  
34  
35 eligible to take part if they were currently treating patients with hip and/or knee pain in  
36  
37 Ireland. The survey for PwOA was advertised via social media (Twitter, LinkedIn), Arthritis  
38  
39 Ireland social media, News Rheum patient newsletter and colleagues and networks of  
40  
41 project steering committee and research team members. PwOA were eligible to take part if  
42  
43 they (1) were living on the island of Ireland, (2) at least 30 years of age, (3) had chronic hip  
44  
45 or knee pain for at least 6 months or more, and (4) did not have joint replacement surgery on  
46  
47 at least one of the painful hips or knees. Strategies to increase recruitment via social media  
48  
49 across all three surveys were adopted including tagging specific advocacy groups, patient or  
50  
51 professional organisations and influencers, providing visual infographics alongside social  
52  
53 media posts and aligning posts with events e.g. National Arthritis Day.

## 47 **Outcomes**

49  
50 Each survey (Supplementary file 1) included an initial set of questions related to participant  
51  
52 demographics. For healthcare professionals, these included questions on sex [are you: (1)  
53  
54 Male, (2) Female, (3) Prefer not to say], length of time qualified, work setting, details of  
55  
56 specific post-qualification training related to OA/chronic pain, confidence in treating hip and  
57  
58 knee OA, percentage of typical caseload with hip or knee OA and where they prefer to  
59  
60 access knowledge of management for persons with hip or knee OA. For PwOA,  
demographic information related to sex [are you: (1) Male, (2) Female, (3) Prefer not to say],

1  
2  
3 age category, geographical area and health conditions were asked. In relation to joint pain,  
4 questions regarding location, duration, severity, referrals to exercise, and use of clinical  
5 guideline specific treatments (muscle strengthening, aerobic exercise, education, weight  
6 loss) were asked. Additional questions were provided for PwOA to understand healthcare  
7 utilisation and previous experiences with exercise.  
8  
9  
10

11 In each survey, a list of statements on exercise beliefs for hip and knee OA were provided  
12 and were rated on a 5-point Likert scale from strongly agree to strongly disagree. The belief  
13 statements were intended to align with current evidence-based guidelines[1,2] and best  
14 practice for exercise and OA. Healthcare professionals were given a more extensive list of  
15 statements that were related to exercise type or referral decisions. A final section related to  
16 barriers and enablers to exercise delivery, referral or uptake was included in each survey.  
17  
18 Results of that analysis are presented elsewhere.  
19  
20  
21  
22

### 23 **Statistical Analysis**

24  
25 Demographic outcomes were summarised as counts/proportions as appropriate. Belief  
26 statements were grouped and summarised descriptively by theme i.e., exercise type and  
27 effectiveness, exercise safety and exercise delivery. Although some statements had slightly  
28 different wording to facilitate understanding and relevance to each group, there were nine  
29 statements that were deemed to be comparable across groups and used to analyse  
30 differences in beliefs. Responses for the 5-point Likert scale statements were collapsed to a  
31 binary scale to label positive beliefs (“strongly agree” or “somewhat agree”) vs. negative  
32 beliefs (“strongly disagree”, “somewhat disagree” or “neither”). “Neither” was included with  
33 negative beliefs since statements were deemed to align somewhat with best practice and  
34 anything short of agreement may be considered unsatisfactory knowledge translation or  
35 personal experience. A commonly defined cut-off for consensus (>75%)[24] between  
36 stakeholders was used. Chi-square (2 x 3) tests of independence were used to assess  
37 differences in agreement with statements between three groups, and Bonferroni adjustment  
38 for between-group differences (p<0.05). Multivariable linear regression was used to explore  
39 associations between exercise beliefs (number of statements agreed with (range 0-9)) in  
40 PwOA and (1) physiotherapy referral from their GP (*Has your GP ever referred you to a*  
41 *physiotherapist for your painful joint? Yes/No*), and (2) physiotherapy attendance (*Have you*  
42 *seen a physiotherapist for your painful joint? Yes/No*). Histograms, Kolmogorov-Smirnov  
43 tests and scatter plots of residuals vs. fitted values were used to test assumptions of Poisson  
44 and linear regression and linear regression was deemed more appropriate. Pearson  
45 correlation coefficients (r>0.5) and variance inflation factor (>5) were used to determine  
46 presence of collinearity between variables. Based on correlates of physical activity for hip  
47  
48  
49  
50  
51  
52  
53  
54  
55  
56  
57  
58  
59  
60

1  
2  
3 and knee OA from previous literature, the following covariates were included using an enter  
4 method in each model: sex[25], average pain rating (none/mild/moderate/severe)[25], pain  
5 duration (6 months-1 year /1-2 years /2-3 years /3-4 years /4+ years)[26] and number of  
6 comorbidities[25]. The most parsimonious models were reported checking for a 10%  
7 difference in beta coefficients upon removal of covariates ( $p>0.05$ ). Data were analysed  
8 using IBM-SPSS version 26.0.0 and Microsoft Excel365.  
9  
10  
11  
12

### 13 **Patient and public involvement**

14  
15 This research was conducted as part of a larger project (IMPACT) that uses a participatory  
16 health research approach. A steering committee of key stakeholders with relevant research,  
17 clinical/system expertise or lived experience (academics, people with arthritis, patient  
18 advocacy group members, physiotherapists, GPs, orthopaedic surgeon) have oversight of  
19 the project from inception to dissemination. Members of the committee were involved in  
20 designing the research question and outcome measures for these surveys, recruitment of  
21 participants, interpretation of analyses and dissemination as co-authors of the publication.  
22  
23  
24  
25  
26

### 27 **RESULTS**

28  
29 There was a total of 421 valid responses from the three distributed surveys, comprising 161  
30 GPs, 163 PTs and 97 PwOA. An additional 26 GP, 33 PT and 15 PwOA surveys were  
31 collected but were not fully completed or did not contain sufficient data for analysis so were  
32 excluded. Demographic data for each stakeholder are presented in **Table 1**.  
33  
34  
35

### 36 **Experiences with Exercise for People with Osteoarthritis**

37  
38 Of the 97 PwOA, 78.4% ( $n=76$ ) had spoken to their GP regarding their joint pain, 63.9%  
39 ( $n=62$ ) had an X-ray of their joint. 38.5% ( $n=37$ ) had been referred to physiotherapy by their  
40 GP and 48.5% ( $n=47$ ) had seen a physiotherapist for their joint (either through GP- or self-  
41 referral). Additionally, 50.5% ( $n=49$ ) reported having been given specific exercises for their  
42 joint by any healthcare professional. A flow diagram with breakdown of these referral  
43 patterns is displayed in **Figure 1**. **Figure 2** shows answers to questions regarding the types  
44 of treatments tried by PwOA, as per clinical guideline recommendations (aerobic exercise,  
45 strengthening exercise, education and weight management).  
46  
47  
48  
49  
50  
51

### 52 **Within-Stakeholder Agreement in Beliefs about Exercise Type and Effectiveness,** 53 **Exercise Safety and Delivery**

54  
55 **Figure 3** shows the Likert scale results in each stakeholder group for statements (a-d),  
56 related to the effectiveness of different types of exercise and for different levels of pain or  
57 perceived severity. **Figure 4** shows the Likert scale results in each stakeholder group for  
58  
59  
60



statements (e-i), related to the safety and delivery of different types of exercise for people with OA. Beliefs were predominantly positive amongst GP's [positive consensus (>75% agreement) on 7/9 statements], PTs (6/9 statements) and PwOA (5/9 statements).

### Between-Stakeholder Differences in Beliefs about Exercise Type and Effectiveness, Exercise Safety and Delivery

Results of chi-square tests for differences in agreement between stakeholders across beliefs statements are presented in **Table 2**. There were differences in stakeholder responses across all statements, except for statement (d): "Exercise works just as well for everybody, regardless of the amount of pain they have" ( $X^2 = 5.14$ ,  $p=0.076$ ). All three stakeholder groups reached a negative consensus regarding this statement. In six of the eight statements where differences were observed, patient beliefs were significantly different to healthcare professional beliefs. There were two statements with a medium effect size for differences between PwOA and service providers: statements (b) "Hip and knee problems can be improved by specific muscle strengthening exercises" ( $V=0.309$ ) and (h) "Most patients with hip or knee OA would benefit from a supervised group exercise programme" ( $V=0.384$ ). All other differences had a small effect size.

**Table 1.** Descriptive statistics using count (proportions) for healthcare professionals and people with osteoarthritis demographics

| Healthcare Professionals Demographics                   | GP (n=161) | PT (n=163) | People with Hip or Knee Osteoarthritis Demographics | PwOA N=97 |
|---------------------------------------------------------|------------|------------|-----------------------------------------------------|-----------|
|                                                         | Count (%)  | Count (%)  |                                                     | Count (%) |
| <b>Sex:</b>                                             |            |            | <b>Sex:</b>                                         |           |
| Female                                                  | 88 (54.7)  | 128 (78.5) | Female                                              | 76 (78.4) |
| Male                                                    | 72 (44.7)  | 34 (20.9)  | Male                                                | 20 (20.6) |
| Prefer not to say                                       | 1 (0.6)    | 1 (0.6)    | Prefer not to say                                   | 1 (1.0)   |
| <b>How long have you been qualified?</b>                |            |            | <b>Most bothersome joint:</b>                       |           |
| Less than 5 years                                       | 33 (20.5)  | 19 (11.7)  | Knee                                                | 52 (53.8) |
| 5-10 years                                              | 25 (15.5)  | 21 (12.9)  | Hip                                                 | 45 (46.4) |
| More than 10 years                                      | 103 (64.0) | 123 (75.5) | <b>Age Category:</b>                                |           |
| <b>Work practice setting (GPs)</b>                      |            |            | 30-39 years                                         | 12 (12.4) |
| Urban                                                   | 60 (37.3)  | -          | 40-49 years                                         | 24 (24.7) |
| Rural                                                   | 34 (21.1)  | -          | 50-59 years                                         | 30 (30.9) |
| Mixed                                                   | 67 (41.6)  | -          | 60-69 years                                         | 25 (25.8) |
| <b>Work practice setting (PTs)</b>                      |            |            | 70-79 years                                         | 6 (6.2)   |
| Public hospital                                         | -          | 38 (23.3)  | <b>Living Location:</b>                             |           |
| Private hospital                                        | -          | 7 (4.3)    | Inner city or suburb                                | 46 (47.4) |
| Primary care                                            | -          | 41 (25.2)  | Town                                                | 16 (16.5) |
| Private practice clinic                                 | -          | 70 (42.9)  | Village                                             | 15 (15.5) |
| Other                                                   | -          | 7 (4.3)    | Open country                                        | 20 (20.6) |
| <b>Post-qualification training on OA / chronic pain</b> |            |            | <b>No. of other comorbidities:</b>                  |           |
| No                                                      | 72 (44.7)  | 37 (22.7)  | 0                                                   | 31 (32.0) |

|                                               |            |           |                                                   |           |
|-----------------------------------------------|------------|-----------|---------------------------------------------------|-----------|
| Inservice/webinars/reading                    | 32 (19.9)  | 17 (10.4) | 1-2                                               | 45 (47.9) |
| Course or conference                          | 28 (17.4)  | 72 (44.2) | 3+                                                | 18 (19.1) |
| Diploma/APP or certification                  | 15 (9.3)   | 3 (1.8)   | <b>Multi-joint pain(&gt;1):</b>                   |           |
| MSc in related field                          | 14 (8.7)   | 32 (19.6) | No                                                | 6 (6.2)   |
| PhD in related field                          | 0          | 2 (1.2)   | Yes                                               | 91 (93.8) |
| <b>Confidence in treating hip and knee OA</b> |            |           | <b>Rating of pain /symptoms on an average day</b> |           |
| Not confident                                 | 2 (1.2)    | 0         | No pain/symptoms                                  | 1 (1.0)   |
| Slightly confident                            | 33 (20.5)  | 5 (3.1)   | Mild                                              | 30 (30.9) |
| Confident                                     | 80 (49.7)  | 41 (25.2) | Moderate                                          | 49 (50.5) |
| Very confident                                | 36 (22.4)  | 86 (52.8) | Severe                                            | 17 (17.5) |
| Extremely confident                           | 10 (6.2)   | 31 (19.0) | <b>Duration of pain</b>                           |           |
| <b>% of typical caseload with hip/knee OA</b> |            |           | 6 mon – 1 year                                    | 24 (24.7) |
| 1-5%                                          | 19 (11.8)  | 19 (11.7) | 1-2 years                                         | 13 (13.4) |
| 6-25%                                         | 117 (72.7) | 83 (50.9) | 2-3 years                                         | 15 (15.5) |
| 26-50%                                        | 24 (14.9)  | 36 (22.1) | 3-4 years                                         | 11 (11.3) |
| 51-75%                                        | 1 (0.6)    | 18 (11.0) | More than 4 years                                 | 34 (35.1) |
| >75%                                          | 0          | 5 (3.1)   |                                                   |           |

APP, Advanced Practice Physiotherapist; GP, General Practitioner; OA, Osteoarthritis; PT, Physiotherapist; PwOA, People with Osteoarthritis.

**Table 2.** Differences in agreement with statements between general practitioner (GP; n=161), physiotherapist (PT; n=163) and people with hip and knee osteoarthritis (PwOA; n=97). Agreement was defined as those who selected “strongly agree” or “somewhat agree” on Likert scales. Proportions that reached within-stakeholder “consensus”, defined as >75% majority, are in bold.

| Statement                                                                                               | Proportion in agreement |                           |                           | Chi-Square | Significance | Cramer's V |
|---------------------------------------------------------------------------------------------------------|-------------------------|---------------------------|---------------------------|------------|--------------|------------|
|                                                                                                         | GP                      | PT                        | PwOA                      |            |              |            |
| <i>(a) Hip and knee problems can be improved by general exercise e.g. walking and swimming</i>          | <b>97.5%</b>            | <b>95.1%</b>              | <b>85.6%</b> <sup>a</sup> | 15.59      | <0.0001      | 0.193      |
| <i>(b) Hip and knee problems can be improved by specific muscle strengthening exercises</i>             | <b>98.8%</b>            | <b>97.5%</b>              | <b>80.9%</b> <sup>a</sup> | 39.04      | <0.0001      | 0.309      |
| <i>(c) Exercise is effective for patients if an x-ray shows severe osteoarthritis</i>                   | 53.8%                   | 63.4%                     | 39.8% <sup>c</sup>        | 13.24      | 0.001        | 0.179      |
| <i>(d) Exercise works just as well for everybody, regardless of the amount of pain they have</i>        | <b>24.2%</b>            | <b>19.6%</b>              | 32.3%                     | 5.14       | 0.076        | n/a        |
| <i>(e) General exercise e.g., walking and swimming is safe for everybody to do</i>                      | <b>85.7%</b>            | 68.9% <sup>b</sup>        | <b>87.1%</b>              | 18.13      | <0.0001      | 0.209      |
| <i>(f) Specific muscle strengthening exercise is safe for everyone to do</i>                            | <b>85.6%</b>            | <b>84.5%</b>              | 69.2% <sup>a</sup>        | 11.86      | 0.003        | 0.170      |
| <i>(g) Every patient with hip or knee OA should try exercise treatment before surgery is considered</i> | <b>86.9%</b>            | <b>99.4%</b> <sup>b</sup> | <b>91.4%</b>              | 19.0       | <0.0001      | 0.214      |
| <i>(h) Most patients with hip or knee OA would benefit from a supervised group exercise programme*</i>  | <b>91.3%</b>            | <b>85.3%</b>              | 52.1% <sup>a</sup>        | 61.35      | <0.0001      | 0.384      |
| <i>(i) Most patients with hip or knee OA would benefit from an individualized exercise programme*</i>   | <b>96.3%</b>            | <b>93.9%</b>              | <b>82.8%</b> <sup>a</sup> | 15.91      | <0.0001      | 0.196      |

<sup>a</sup>Significantly different compared to GP and PT, <sup>b</sup>significantly different to GP and PwOA, <sup>c</sup>significantly different to PT, using Bonferroni at .05 level. \*Questions for PwOA phrased as: “The best way to learn about exercise is in a supervised group setting with people who have similar pain” and “The best way to learn about exercise is in a one-on-one setting with a health professional”. Cramer’s V =0.1 small, 0.3 medium, 0.5 large effect size. GP, general practitioner; OA, osteoarthritis; PT, physiotherapist; PwOA, people with osteoarthritis.

## Predictors of Patient Beliefs

There was no association between beliefs of PwOA about exercise and the question: “has your GP ever referred you to a physiotherapist for your painful joint?” (**Supplemental File 2**) [B=0.19 (95% CI -0.10, 1.50)]. In this model, a higher number of comorbidities [B=-0.26 (95% CI -0.56, -0.07)] was negatively associated with beliefs about exercise. In model 2, there was a positive association between beliefs of PwOA about exercise and the question: “Have you seen a physiotherapist for your painful joint?” [B=1.06 (95% CI 0.30, 1.82)]. Sex (male) [B=-0.72 (95% CI -1.44, -0.00)], a longer duration of pain and symptoms [B=-0.20 (95% CI -0.40, -0.01)] and a higher number of comorbidities [B=-0.29 (95% CI -0.53, -0.06)] were negatively associated with beliefs about exercise in this model.

## Healthcare Professional Sources of Education

For the question, “Where do you get your knowledge of care advancements for persons with knee or hip osteoarthritis?”; the top five selected responses for GPs were continuous medical education (CME) or GP training networks (78%), published guidelines or recommendations (61%), reading medical journals (47%), conference attendance (47%) and course attendance (31%). For the question, “Where do you access your knowledge of management for persons with knee or hip osteoarthritis?”; the top five selected responses for PTs were published guidelines or recommendations (85%), reading research articles (75%), clinic protocols and discussion with peers or in-services (70%), course attendance (61%) and conference attendance (47%).

## DISCUSSION

This research identified differences in beliefs about exercise effectiveness, safety and delivery between healthcare professionals and PwOA. While predominantly positive beliefs were observed across stakeholders, there was less consensus regarding the effectiveness of exercise when an X-ray shows “severe” OA. With regards to exercise referral, 48.5% of PwOA had either been referred to or self-referred to a physiotherapist for their joint pain. Referral to a physiotherapist by their GP was not associated with positive exercise beliefs.

1  
2  
3 However, attendance at a physiotherapist for joint pain was associated with positive exercise  
4 beliefs in PwOA.  
5

6  
7 If OA management guidelines do not align with the personal beliefs of service providers or  
8 users, PwOA may not receive high quality care. This study has found that GPs (7/9  
9 statements), PTs (6/9 statements) and PwOA (5/9 statements) have largely positive beliefs  
10 regarding exercise for OA. However, there is less certainty about exercise when an X-ray  
11 shows “severe osteoarthritis” across all stakeholders, and service providers do not agree  
12 that “*exercise works just as well for everybody, regardless of the level of pain they have*”.  
13 These results highlight that beliefs are generally in line with best evidence and clinical  
14 guidelines. However, there may still be some misconceptions about the effectiveness of  
15 exercise for higher levels of pain and disease. Evidence suggests that the pain-relieving  
16 qualities of exercise are effective for even moderate to severe OA disease[27–29], and a  
17 more recent meta-analysis for hip and knee OA has shown that individuals with higher pain  
18 severity at baseline benefit more from therapeutic exercise than those with lower pain[30].  
19 This evidence should be a focus of future efforts of knowledge translation to clinicians and  
20 PwOA.  
21  
22  
23  
24  
25  
26  
27  
28  
29

30 Some of the beliefs identified in this study are reflective of the traditional view of OA as a  
31 “wear and tear” disease, synonymous with a desire to protect a “damaged” joint on X-ray  
32 from further damage, as found previously[8,20]. However, an encouraging finding from this  
33 research are the overwhelmingly more positive views towards exercise observed compared  
34 to similar studies published on a cohort of UK-based PTs in 2009[13], older adults with knee  
35 pain in 2012[9] and GPs in 2017[16]. Using the comparator of statements with at least  
36 majority view (>50% agreement), in the 2009 study[13], PTs agreed on the benefit of  
37 exercise for knee pain on 4/12 statements (33%), compared to 8/9 similar statements (89%)  
38 in the current study. For older adults with knee pain, there was no agreement for any  
39 statement in the 2012 study[9], compared to 7/9 statements (78%) in the current study. This  
40 may be reflective of the younger age and inclusion of hip and knee pain in the current study.  
41 In the 2017 study[16], GPs agreed on 9/12 statements (75%), compared to 8/9 statements  
42 (89%) in the current study. While some statements varied slightly, stronger exercise  
43 recommendations in clinical guidelines and greater efforts in implementation and translation  
44 to practice in the last 10 years are likely the rationale for these changes, particularly since  
45 clinical guideline updates in 2014[1,2]. However, there is still much space to enact  
46 recommendations from a 2018 Cochrane review to provide better information and advice  
47 about the safety and value of exercise for patients[31]. In particular, providing reassurance  
48 on the role of exercise in managing symptoms, and discussion of opportunities to participate  
49  
50  
51  
52  
53  
54  
55  
56  
57  
58  
59  
60

1  
2  
3 in activities regarded as enjoyable and relevant, may encourage greater exercise  
4 participation[31].  
5

6  
7 Beliefs of PwOA about exercise were significantly less positive compared to healthcare  
8 professional beliefs for 6/9 statements, even though significantly more PwOA believed that  
9 general exercises are safe for everybody to do, compared to PTs. The greatest differences  
10 were observed for statements in relation to the benefits of strengthening exercises and  
11 group-based exercise but effect sizes were small to medium overall. Given 40% had never  
12 tried weight or strength-based training for their joint, and an additional 28% tried, but since  
13 stopped this type of exercise, healthcare professionals should be cognisant of ensuring  
14 patients understand the benefit of muscle strengthening and support patients to find  
15 enjoyable and sustainable ways to build these exercises into weekly routines. While  
16 strength-based training is not deemed superior to aerobic type exercise for pain relief in  
17 OA[27,32], knock-on benefits for improvements in physical function, longevity, bone health,  
18 and frailty[33] during ageing are important to highlight. Results for aerobic type exercise,  
19 however, were much more promising as only 14% had not tried this type of exercise for their  
20 joint and 67% were actively using. Further exploration on reasons for stopping exercise  
21 would be of benefit to determine if low adherence is related to barriers to exercise  
22 participation or a lack of perceived improvement in symptoms. While there is no strong  
23 evidence to indicate a difference in effectiveness regarding exercise setting, PwOA were  
24 less likely to agree with the benefits of a supervised group setting compared to service  
25 providers. Additional benefits of group exercise for older adults, such as social support, peer-  
26 learning, improvements in mental health and loneliness, and cost-effectiveness should,  
27 however, be considered and encouraged[34–36].  
28  
29  
30  
31  
32  
33  
34  
35  
36  
37  
38  
39  
40

41 Physiotherapists are primary care providers of therapeutic exercise for people with OA and  
42 other chronic conditions. It was therefore hypothesised that PTs would have more positive  
43 beliefs regarding exercise compared to GPs. However, this was not shown to be the case  
44 based on findings in this study. PTs were significantly more positive regarding statement (g):  
45 *Every patient with hip or knee OA should try exercise treatment before surgery is*  
46 *considered.* However, more GPs responded positively to statement (e): *General exercise*  
47 *e.g., walking and swimming is safe for everybody to do,* and overall, there was a positive  
48 consensus on more statements amongst GPs (7/9) compared to PTs (6/9). These findings  
49 are somewhat at odds to the review by Nissen et al (including studies published from 2006-  
50 2019), which identified a certain lack of knowledge about the role of physical activity,  
51 exercise and physiotherapy in OA management amongst some GPs and PTs[20]. It  
52 suggests that the main barriers to implementation of exercise may not be entirely related to  
53 lack of updated knowledge or beliefs of the healthcare professionals.  
54  
55  
56  
57  
58  
59  
60

1  
2  
3 In this study, referral to physiotherapy by a GP was not associated with more positive  
4 exercise beliefs in PwOA, in contrast to what was hypothesised. Although GPs had the most  
5 positive beliefs in comparison with other stakeholders, this finding may reflect the lack of  
6 time in a GP consultation to educate about exercise therapy and influence patient beliefs. A  
7 referral to exercise therapy alone may not be enough. However, seeing a PT for  
8 osteoarthritis was associated with more positive exercise beliefs. This may suggest that PTs  
9 impart important knowledge and education regarding the benefits of exercise to their  
10 patients, that, in turn, changes patient beliefs. Equally, this finding may suggest that PwOA  
11 with more positive exercise beliefs are more likely to attend a PT appointment. Tracking of  
12 changes in beliefs over time is recommended to further explore this association. Compared  
13 to GPs, PTs have more time in a consultation to discuss the effectiveness, mechanism, and  
14 safety of exercise for joint pain, which may help to influence beliefs and maximise the  
15 potential effect of exercise programs by improving adherence[37]. It is known that the  
16 provision of education for OA is superior for patient outcomes when combined with exercise  
17 therapy[38]. Almost 60% of PwOA reported having not tried self-management/education,  
18 despite some programme availability in Ireland[39]. PwOA were not asked specifically if their  
19 GP referred them to a self-management programme, which is a required area of further  
20 exploration. Additional efforts are required to support clinicians with resources to deliver  
21 trustworthy educational content for PwOA, or increase knowledge of available self-  
22 management programmes, to ensure clinical recommendations are fully implemented.

23  
24  
25  
26  
27  
28  
29  
30  
31  
32  
33  
34  
35 In the current study, 78% of PwOA had spoken to their GP about their joint pain, while under  
36 50% of these people had been referred to a PT. Despite OA being amongst the leading  
37 causes of years lived with disability[40], the decision to seek care can be deterred by  
38 negative or dismissive attitudes from healthcare professionals about their non-urgent  
39 condition, or the perception that pain is part of ageing[41]. Healthcare professionals should  
40 take care regarding attitudes and language use during consultations[42] to help promote the  
41 effectiveness of first-line treatment strategies. Additionally, decisions regarding treatment  
42 timing may require additional educational strategies given clinical guidelines support surgical  
43 intervention as the last resort[1,2]. In this study more PwOA were referred to an orthopaedic  
44 consultant (58%) rather than PT (49%). From the regression analysis, it is also apparent that  
45 people with multiple comorbidities may require additional supports to improve positive beliefs  
46 about exercise for their condition. For people living with the burden of multiple conditions,  
47 additional barriers to exercise may require more supportive self-management sessions and  
48 thorough training of exercise facilitators[43].

49  
50  
51  
52  
53  
54  
55  
56  
57  
58 This study has shown that the most used education sources for healthcare professionals on  
59 management of OA are: published guidelines or recommendations (85% of PTs, 61% of  
60

1  
2  
3 GPs), use of training networks, in-clinic protocols, discussion and in-services (70% of PTs,  
4 78% of GPs) and reading medical journals or research articles (75% of PTs, 47% of GPs).  
5  
6 Even where clinicians report using clinical guidelines and research to guide practice, this is  
7  
8 no guarantee that the most up-to-date recommendations are being used with confidence, or  
9  
10 that they are being interpreted, recalled or implemented appropriately[44]. In contrast to this  
11  
12 study, previous international investigations have shown that only a small proportion of sport  
13  
14 and musculoskeletal PTs use research articles to change their clinical practice (10.4%)[45].  
15  
16 Over half of PTs instead cited “interactions with colleagues” and “attending private education  
17  
18 short courses” as the source for change[45]. Given the high proportion of GPs that use CME  
19  
20 small groups and training networks, peer-learning opportunities may be a viable source of  
21  
22 intervention to ensure practice guidelines are being met[46]. The evidence to practice gap  
23  
24 could be filled with clinical guideline supplements that address contextual barriers and time  
25  
26 needed to treat[47], and courses/training that include opportunities to discuss real-world  
27  
28 implementation of evidence with experienced colleagues and experts, with input from  
29  
30 patients on delivery needs.

31  
32 While efforts were made to recruit participants for this research from multiple diverse  
33  
34 sources, this study was not a representative sample. The highest proportion (31%) of PwOA  
35  
36 in this study were in the 50–59-year age category and 50% reported moderate joint pain.  
37  
38 While prevalence of OA is higher in older age categories, the sample recruited is likely  
39  
40 reflective of the online nature of participation, wide inclusion criteria (age 30+ years) and  
41  
42 exclusion criteria for previous joint replacement surgery. Due to the timing of survey  
43  
44 administration (during COVID-19 pandemic lockdown), traditional survey advertising  
45  
46 methods such as GP and health clinic waiting rooms were not utilised. Completion of an  
47  
48 anonymous survey has benefits as results cannot be influenced, however if there was any  
49  
50 confusion related to phrasing of a certain question or statement, then this could not be  
51  
52 clarified. The selection of other belief statements about exercise may have yielded different  
53  
54 results. Future research should also investigate similar beliefs using qualitative approach to  
55  
56 allow for more context to these answers.

## 57 58 59 60 **Conclusion**

61  
62 Beliefs of GPs, PTs and PwOA regarding exercise as a treatment for hip and knee OA have  
63  
64 likely become more positive in recent years. However, there is still much scope for service  
65  
66 improvement, with less than 50% of PwOA having seen a PT for their joint pain and all  
67  
68 stakeholders in disagreement with statements relating to effectiveness of exercise for severe  
69  
70 joint pain. This sample included PwOA who did not have a previous joint replacement  
71  
72 surgery and may therefore not be generalisable to an older sample with more severe

disease. Knowledge translation activities should be aimed at increasing knowledge and improving access to first-line evidence-based exercise therapies, using stakeholder co-design to provide context on barriers and facilitators.

**Contributorship Statement** - Toomey CM: Conceptualization, Methodology, Formal Analysis, Supervision, Writing – Original Draft. Higgins N: Methodology, Formal Analysis, Writing – Reviewing & Editing; Wood-Thornsbury A: Methodology, Formal Analysis, Writing – Reviewing & Editing; Rector J: Methodology, Formal Analysis, Writing – Reviewing & Editing; Bhardwaj A: Methodology, Writing – Review & Editing; Hayes P: Methodology, Writing – Review & Editing; Browne J: Methodology, Writing – Review & Editing; Grealis S: Methodology, Writing – Review & Editing; Maguire D: Methodology, Writing – Review & Editing; O’Hora J: Methodology, Writing – Review & Editing; Dowling I: Methodology, Writing – Review & Editing; Kennedy N: Conceptualization, Supervision, Writing – Review & Editing.

**Competing Interests** – none to declare.

**Funding** - Funding for this project (IMPACT), salary of the PI (CMT) and student fees and stipend (AB) from Health Research Board (Ireland) Emerging Investigator Award, awarded to CMT (EIA-2019-008).

**Data Sharing Statement** - All data pertaining to this study is anonymous and can be shared upon reasonable request for secondary data analysis by contacting the PI (corresponding author).

**Ethics Approval** - All procedures were approved by the University of Limerick Faculty of Education & Health Sciences Research Ethics Committee (REC) (2020\_12\_13\_EHS) and the Irish College of General Practitioners REC (ICGP\_REC\_21\_0006).

**Acknowledgements** – We acknowledge the contributions of other members of the IMPACT Steering Committee who were involved in the interpretation of these results (Adrian Cassar-Gheiti, Helen French, Brenda Monaghan, Bronwen Maher and James Young).

**Figure 1.** Flow chart of referral patterns for people with osteoarthritis.

**Figure 2.** Proportion of responses to guideline-based treatments people with osteoarthritis (n=97) have tried.

**Figure 3.** 100% stacked bar chart showing Likert scale results with count for each stakeholder on belief statements (a-d) related to exercise effectiveness. GP, general practitioner; PT, physiotherapist; PwOA, people with osteoarthritis.



**Figure 4.** 100% stacked bar chart showing Likert scale results with count for each stakeholder on belief statements (e-i) related to exercise safety and delivery. \*Questions for PwOA phrased slightly differently: “The best way to learn about exercise is in a supervised group setting with people who have similar pain” and “The best way to learn about exercise is in a one-on-one setting with a health professional”. GP, general practitioner; PT, physiotherapist; PwOA, people with osteoarthritis.

## REFERENCES

- 1 McAlindon TE, Bannuru RR, Sullivan MC, *et al.* OARSI guidelines for the non-surgical management of knee osteoarthritis. *Osteoarthr Cartil* 2014;**22**:363–88. doi:10.1016/j.joca.2014.01.003
- 2 National Institute for Health & Clinical Excellence. Osteoarthritis: care and management. London: 2014.
- 3 Hunter DJ. Osteoarthritis: time for us all to shift the needle. *Rheumatology* 2018;**57**:iv1–2. doi:10.1093/rheumatology/key065
- 4 Hagen REB, Smedslund G, Østeras N, *et al.* Quality of Community-Based Osteoarthritis Care : A Systematic Review and Meta-Analysis. *Arthritis Care Res* 2016;**68**:1443–52. doi:10.1002/acr.22891
- 5 Healey EL, Afolabi EK, Lewis M, *et al.* Uptake of the NICE osteoarthritis guidelines in primary care: a survey of older adults with joint pain. *BMC Musculoskelet Disord* 2018;**19**:295. doi:10.1186/s12891-018-2196-2
- 6 Briggs AM, Jordan JE, Kopansky-Giles D, *et al.* The need for adaptable global guidance in health systems strengthening for musculoskeletal health: a qualitative study of international key informants. *Glob Heal Res policy* 2021;**6**:24. doi:10.1186/s41256-021-00201-7
- 7 Geenen R, Overman CL, Christensen R, *et al.* EULAR recommendations for the health professional’s approach to pain management in inflammatory arthritis and osteoarthritis. *Ann Rheum Dis* 2018;**77**:797–807. doi:10.1136/annrheumdis-2017-212662
- 8 Darlow B, Brown M, Thompson B, *et al.* Living with osteoarthritis is a balancing act : an exploration of patients ’ beliefs about knee pain. *BMC Rheumatol* 2018;**2**. doi:10.1186/s41927-018-0023-x BMC

- 1  
2  
3 9 Holden MA, Nicholls EE, Young J, *et al.* Role of Exercise for Knee Pain : What Do  
4 Older Adults in the Community Think ? *Arthritis Care Res* 2012;**64**:1554–64.  
5 doi:10.1002/acr.21700  
6  
7  
8  
9 10 Bunzli S, Brien PO, Ayton D, *et al.* Misconceptions and the Acceptance of Evidence-  
10 based Nonsurgical Interventions for Knee Osteoarthritis . A Qualitative Study. *Clin*  
11 *Orthop Relat Res* 2019;**477**:1975–83. doi:10.1097/CORR.0000000000000784  
12  
13  
14 11 Armitage CJ, Conner M. Social cognition models and health behaviour: A structured  
15 review. *Psychol Health* 2000;**15**:173–89. doi:10.1080/08870440008400299  
16  
17  
18 12 Hurley M V, Walsh N, Bhavnani V, *et al.* Health beliefs before and after participation  
19 on an exercised-based rehabilitation programme for chronic knee pain: Doing is  
20 believing. *BMC Musculoskelet Disord* 2010;**11**:31. doi:10.1186/1471-2474-11-31  
21  
22  
23 13 Holden MA, Nicholls EE, Young J, *et al.* UK-Based Physical Therapists ' Attitudes and  
24 Beliefs Regarding Exercise and Knee Osteoarthritis : Findings From a Mixed-Methods  
25 Study. *Arthritis Care Res* 2009;**61**:1511–21. doi:10.1002/art.24829  
26  
27  
28 14 Hunter DJ. Osteoarthritis Management: Time to Change the Deck. *J Orthop Sports*  
29 *Phys Ther* 2017;**47**:370–2. doi:10.2519/jospt.2017.0605  
30  
31  
32 15 Briggs AM, Hinman RS, Darlow B, *et al.* Confidence and Attitudes Toward  
33 Osteoarthritis Care Among the Current and Emerging Health Workforce: A  
34 Multinational Interprofessional Study. *ACR open Rheumatol* 2019;**1**:219–35.  
35 doi:10.1002/acr2.1032  
36  
37  
38  
39 16 Cottrell E, Foster NE, Porcheret M, *et al.* GPs ' attitudes , beliefs and behaviours  
40 regarding exercise for chronic knee pain : a questionnaire survey. *BMJ Open* 2017;**7**.  
41 doi:10.1136/bmjopen-2016-014999  
42  
43  
44  
45 17 MacKay C, Hawker GA, Jaglal SB. Qualitative study exploring the factors influencing  
46 physical therapy management of early knee osteoarthritis in Canada. *BMJ Open*  
47 2018;**8**. doi:10.1136/bmjopen-2018-023457  
48  
49  
50 18 Barker KL, Reid M, Minns Lowe CJ. What does the language we use about arthritis  
51 mean to people who have osteoarthritis? A qualitative study. *Disabil Rehabil*  
52 2014;**36**:367–72. doi:10.3109/09638288.2013.793409  
53  
54  
55  
56 19 Cottrell E, Roddy E, Foster N. The attitudes, beliefs and behaviours of GPs regarding  
57 exercise for chronic knee pain: a systematic review. *BMC Fam Pract*  
58 2010;**11**.<http://www.doaj.org/doaj?func=abstract&id=516161>  
59  
60

- 1  
2  
3 20 Nissen N, Holm PM, Bricca A, *et al.* Clinicians' beliefs and attitudes to physical activity  
4 and exercise therapy as treatment for knee and/or hip osteoarthritis: a scoping  
5 review. *Osteoarthr Cartil* 2022;**30**:260–9. doi:10.1016/j.joca.2021.11.008  
6  
7  
8  
9 21 Barton CJ, Ezzat AM, Bell EC, *et al.* Knowledge , confidence and learning needs of  
10 physiotherapists treating persistent knee pain in Australia and Canada : a mixed-  
11 methods study. *Physiother Theory Pract* 2021;:1–13.  
12 doi:10.1080/09593985.2021.1906805  
13  
14  
15 22 Toomey CM, Kennedy N, Macfarlane A, *et al.* Implementation of clinical guidelines for  
16 osteoarthritis together (IMPACT): protocol for a participatory health research  
17 approach to implementing high value care. *BMC Musculoskelet Disord* 2022;**23**.  
18 doi:10.1186/s12891-022-05599-w  
19  
20  
21  
22 23 Regan AO, Hayes P, Connor RO, *et al.* The University of Limerick Education and  
24 Research Network for General Practice ( ULEARN-GP ): practice characteristics and  
25 general practitioner perspectives. *BMC Fam Pract* 2020;**21**.  
26 doi:https://doi.org/10.1186/s12875-020-1100-y  
27  
28  
29  
30 24 Diamond IR, Grant RC, Feldman BM, *et al.* Defining consensus: a systematic review  
31 recommends methodologic criteria for reporting of Delphi studies. *J Clin Epidemiol*  
32 2014;**67**:401–9. doi:10.1016/j.jclinepi.2013.12.002  
33  
34  
35 25 Stubbs B, Hurley M, Smith T. What are the factors that influence physical activity  
36 participation in adults with knee and hip osteoarthritis? A systematic review of  
37 physical activity correlates. *Clin Rehabil* 2015;**29**:80–94.  
38 doi:10.1177/0269215514538069  
39  
40  
41  
42 26 Rosemann T, Kuehlein T, Laux G, *et al.* Osteoarthritis of the knee and hip: a  
43 comparison of factors associated with physical activity. *Clin Rheumatol*  
44 2007;**26**:1811–7. doi:10.1007/s10067-007-0579-0  
45  
46  
47 27 Juhl C, Christensen R, Roos EM, *et al.* Impact of Exercise Type and Dose on Pain  
48 and Disability in Knee Osteoarthritis A Systematic Review and Meta-Regression  
49 Analysis of Randomized Controlled Trials. *Arthritis Rheumatol* 2014;**66**:622–36.  
50 doi:10.1002/art.38290  
51  
52  
53  
54 28 Susko AM, Fitzgerald GK. The pain-relieving qualities of exercise in knee  
55 osteoarthritis. *Open access Rheumatol Res Rev* 2013;**5**:81–91.  
56 doi:10.2147/OARRR.S53974  
57  
58  
59 29 Skou ST, Roos EM, Laursen MB, *et al.* A Randomized, Controlled Trial of Total Knee  
60

- 1  
2  
3 Replacement. *N Engl J Med* 2015;**373**:1597–606. doi:10.1056/NEJMoa1505467  
4  
5  
6 30 Holden MA, Hattle M, Runhaar J, *et al.* Moderators of the effect of therapeutic  
7 exercise for knee and hip osteoarthritis : a systematic review and individual participant  
8 data meta-analysis. *Lancet Rheumatol* 2023;**5**:e386–400. doi:10.1016/S2665-  
9 9913(23)00122-4  
10  
11  
12 31 Hurley M, Dickson K, Hallett R, *et al.* Exercise interventions and patient beliefs for  
13 people with hip, knee or hip and knee osteoarthritis: a mixed methods review  
14 (Review). *Coch* 2018;:CD010842.  
15 doi:10.1002/14651858.CD010842.pub2.www.cochranelibrary.com  
16  
17  
18  
19 32 Goh S-L, Persson MSM, Stocks J, *et al.* Relative Efficacy of Different Exercises for  
20 Pain, Function, Performance and Quality of Life in Knee and Hip Osteoarthritis:  
21 Systematic Review and Network Meta-Analysis. *Sports Med* 2019;**49**:743–61.  
22 doi:10.1007/s40279-019-01082-0  
23  
24  
25  
26 33 Seguin R, Nelson ME. The benefits of strength training for older adults. *Am J Prev*  
27 *Med* 2003;**25**:141–9. doi:10.1016/s0749-3797(03)00177-6  
28  
29  
30 34 Komatsu H, Yagasaki K, Saito Y, *et al.* Regular group exercise contributes to  
31 balanced health in older adults in Japan: a qualitative study. *BMC Geriatr*  
32 2017;**17**:190. doi:10.1186/s12877-017-0584-3  
33  
34  
35 35 Grønne DT, Roos EM, Ibsen R, *et al.* Cost-effectiveness of an 8- - week supervised  
36 education and exercise therapy programme for knee and hip osteoarthritis : a pre –  
37 post analysis of 16 255 patients participating in Good Life with osteoArthritis in  
38 Denmark (GLA:D). *BMJ Open* 2021;**11**. doi:10.1136/bmjopen-2021-049541  
39  
40  
41  
42 36 Mays AM, Kim S, Rosales K, *et al.* The Leveraging Exercise to Age in Place (LEAP)  
43 Study: Engaging Older Adults in Community-Based Exercise Classes to Impact  
44 Loneliness and Social Isolation. *Am J Geriatr psychiatry Off J Am Assoc Geriatr*  
45 *Psychiatry* 2021;**29**:777–88. doi:10.1016/j.jagp.2020.10.006  
46  
47  
48  
49 37 Gay C, Chabaud A, Guilley E, *et al.* Educating patients about the benefits of physical  
50 activity and exercise for their hip and knee osteoarthritis. Systematic literature review.  
51 *Ann Phys Rehabil Med* 2016;**59**:174–83.  
52 doi:https://doi.org/10.1016/j.rehab.2016.02.005  
53  
54  
55  
56 38 Goff AJ, Oliveira D De, Merolli M, *et al.* Patient education improves pain and function  
57 in people with knee osteoarthritis with better effects when combined with exercise  
58 therapy : a systematic review. *J Physiother* 2021;**67**:177–89.  
59  
60

- 1  
2  
3 doi:10.1016/j.jphys.2021.06.011  
4  
5  
6 39 Arthritis Ireland. Living Well with Arthritis (and Related Conditions) Self-Management  
7 Programme. Courses. 2023. [https://www.arthritisireland.ie/living-well-with-arthritis-and-](https://www.arthritisireland.ie/living-well-with-arthritis-and-related-conditions-self-management-programme)  
8 related-conditions-self-management-programme (accessed 22 Aug 2023).  
9  
10  
11 40 Vos T, Lim SS, Abbafati C, *et al*. Global burden of 369 diseases and injuries in 204  
12 countries and territories, 1990-2019: a systematic analysis for the Global Burden of  
13 Disease Study 2019. *Lancet* 2020;**396**:1204–22. doi:10.1016/S0140-6736(20)30925-9  
14  
15  
16 41 Prasanna SS, Korner-bitensky N, Ahmed S. Why Do People Delay Accessing Health  
17 Care for Knee Osteoarthritis ? Exploring Beliefs of Health Professionals and Lay  
18 People. *Physiother Canada* 2013;**65**:56–64. doi:10.3138/ptc.2011-50  
19  
20  
21 42 Vennik J, Hughes S, Smith KA, *et al*. Patient and practitioner priorities and concerns  
22 about primary healthcare interactions for osteoarthritis: A meta-ethnography. *Patient*  
23 *Educ Couns* 2022;**105**:1865–77. doi:<https://doi.org/10.1016/j.pec.2022.01.009>  
24  
25  
26 43 Skou ST, Brødsgaard RH, Nyberg M, *et al*. Personalised exercise therapy and self-  
27 management support for people with multimorbidity: feasibility of the MOBILIZE  
28 intervention. *Pilot Feasibility Stud* 2023;**9**:12. doi:10.1186/s40814-023-01242-0  
29  
30  
31 44 Swaites L, Paskins Z, Finney A. Factors influencing the implementation of evidence-  
32 based guidelines for osteoarthritis in primary care : A systematic review and thematic  
33 synthesis. *Musculoskeletal Care* 2020;**18**:101–10. doi:10.1002/msc.1452  
34  
35  
36 45 Whiteley R, Napier C, van Dyk N, *et al*. Clinicians use courses and conversations to  
37 change practice, not journal articles: is it time for journals to peer-review courses to  
38 stay relevant? *Br J Sports Med* 2021;**55**:651 LP – 652. doi:10.1136/bjsports-2020-  
39 102736  
40  
41  
42 46 Lineker SC, Bell MJ, Boyle J, *et al*. Implementing arthritis clinical practice guidelines in  
43 primary care. *Med Teach* 2009;**31**:230–7. doi:10.1080/01421590802158377  
44  
45  
46 47 Johansson M, Guyatt G, Montori V, *et al*. Guidelines should consider clinicians ' time  
47 needed to treat. *Br Med J* 2023;**380**. doi:10.1136/bmj-2022-072953  
48  
49  
50  
51  
52  
53  
54  
55  
56  
57  
58  
59  
60



Figure 1. Flow chart of referral patterns for people with osteoarthritis.

605x459mm (47 x 47 DPI)



Figure 2. Proportion of responses to guideline-based treatments people with osteoarthritis (n=97) have tried.

680x385mm (47 x 47 DPI)



Figure 3. 100% stacked bar chart showing Likert scale results with count for each stakeholder on belief statements (a-d) related to exercise effectiveness. GP, general practitioner; PT, physiotherapist; PwOA, people with osteoarthritis.

377x526mm (47 x 47 DPI)





Figure 4. 100% stacked bar chart showing Likert scale results with count for each stakeholder on belief statements (e-i) related to exercise safety and delivery. \*Questions for PwOA phrased slightly differently: "The best way to learn about exercise is in a supervised group setting with people who have similar pain" and "The best way to learn about exercise is in a one-on-one setting with a health professional". GP, general practitioner; PT, physiotherapist; PwOA, people with osteoarthritis

354x545mm (47 x 47 DPI)

**Supplemental File 1**

Guideline-based exercise management for hip and knee osteoarthritis: differences in healthcare professional and patient beliefs

## **Survey 1: Beliefs, Barriers and Enablers to Exercise Prescription for Hip and Knee Osteoarthritis in General Practice in Ireland**

Instructions for completing this questionnaire

- When completing the questionnaire, please try and provide answers that most accurately reflect your usual clinical practice. There are no 'correct' or 'incorrect' answers.
- Please do not consult any literature while completing this questionnaire.

### **Section 1. Information about you**

1. How long have you been qualified as a General Practitioner?
  - Less than 5 years experience
  - 5-10 years experience
  - Greater than 10 years experience
2. How many GP's work in your practice (including yourself)
3. Are you:  Female  Male  Other  Prefer not to disclose
4. Is your primary practice:  urban  rural  mixed
5. Is your practice:
  - Primary care reimbursement scheme only
  - Private practice only
  - Mixed
6. Since graduating from University, do you remember receiving any specific postgraduate training in musculoskeletal (MSK) which contained education about hip or knee osteoarthritis or chronic pain? (By this we do not mean clinical placements or jobs in rheumatology or orthopaedics)
  - Yes  No
  - If yes, what type of training?
    - CME small groups (or guest speaker)
    - Diploma in MSK
    - M.Sc. in Sports & Exercise Medicine
    - Sports Medicine Faculty conferences
    - Private Hospital Day Course
    - Therapeutic Intra Articular and Soft Tissue Injection and Assessment Course
    - Specific Modules on MSK on your GP training Scheme
    - Other \_\_\_\_\_
7. How would you rate your confidence in treating hip and knee osteoarthritis?
  - Not confident
  - Slightly confident
  - Confident
  - Very confident
  - Extremely confident
8. Do you have, or have you ever suffered from chronic knee or hip pain yourself?
  - Yes  No
9. What percentage of your typical caseload is made up of patients with hip and/or knee pain?
  - 1-5%  6-25%  26-50%  51-75%  >75%

### **Section 2. Exercise beliefs for hip and knee osteoarthritis**

2.1 Where do you get your knowledge of care advancements for persons with knee or hip osteoarthritis? (Tick all that apply)

- Published guidelines or recommendations (e.g. NICE, EULAR, OARSI)
- Reading medical journals
- Twitter or other social media
- Podcasts
- CME networks or other GP networks
- Conference attendance
- Course attendance

**Supplemental File 1**

Guideline-based exercise management for hip and knee osteoarthritis: differences in healthcare professional and patient beliefs

Other \_\_\_\_\_

**We are interested in your views about the role of exercise in the treatment of hip and knee osteoarthritis. Please indicate the extent to which you agree or disagree with the statements given by ticking or placing an 'X' in one box per row.**

| Question                                                                                                                         | Strongly Disagree | Disagree | Neutral | Agree | Strongly Agree |
|----------------------------------------------------------------------------------------------------------------------------------|-------------------|----------|---------|-------|----------------|
| 2.2 Hip and knee problems are improved by general exercise e.g. walking and swimming                                             |                   |          |         |       |                |
| 2.3 Hip and knee problems are improved by specific muscle strengthening exercises                                                |                   |          |         |       |                |
| 2.4 General exercise e.g. walking and swimming is safe for everybody to do                                                       |                   |          |         |       |                |
| 2.5 Specific muscle strengthening exercise is safe for everyone to do                                                            |                   |          |         |       |                |
| 2.6 Every patient with hip or knee OA should try conservative exercise treatment before more invasive procedures are recommended |                   |          |         |       |                |
| 2.7 Exercise for hip or knee OA is most beneficial when it is tailored to meet individual patient needs                          |                   |          |         |       |                |
| 2.8 A standard set of exercises is sufficient for every patient with hip or knee OA                                              |                   |          |         |       |                |
| 2.9 Education on lifestyle change is important for patients with OA                                                              |                   |          |         |       |                |
| 2.10 Education on strategies for self-management of pain are important for patients with OA                                      |                   |          |         |       |                |
| 2.11 It is important that people with OA increase their overall activity levels                                                  |                   |          |         |       |                |
| 2.12 Exercise is effective for patients if an x-ray shows severe knee osteoarthritis                                             |                   |          |         |       |                |
| 2.13 Exercise for OA is more effectively provided by physiotherapists than GPs                                                   |                   |          |         |       |                |
| 2.14 Time constraints prevent the provision of advice on individual exercises for OA                                             |                   |          |         |       |                |
| 2.15 Exercise for OA should preferably be used after drug treatment has been tried                                               |                   |          |         |       |                |
| 2.16 Exercise for chronic knee pain would be used more frequently if access to physiotherapy was easier                          |                   |          |         |       |                |

**Section 3. Clinical scenario of a patient with osteoarthritis**

Presented below is a clinical scenario of a patient with suspected knee osteoarthritis who presents to you with this problem for the first time. All questions in this section relate to the care you would give this particular

**Patient:** Mrs. Murphy, 60-year old shop owner, no health insurance  
**Complaint:** Right sided knee pain  
**History:** Gradually worsening over 3 years  
 No history of trauma  
 Pain when walking and at rest, worst when climbing stairs.  
 No night pain.  
 Activities of daily living are manageable. Difficulty gardening.  
 Finding work increasingly difficult due to the stairs  
 Tried going to gym but stopped – thinks was making pain worse.  
 Otherwise well – mild hypertension  
 Has tried ibuprofen with no effect  
**Medication:** Amlodipine  
**Examination:** Mild Obesity with Body Mass Index of 33  
 Knees – bilaterally no effusions.  
 Joint line tenderness on palpation.  
 No pain or reduced mobility around knee cap  
 Slightly reduced flexion of the right knee.  
 Hips – no abnormality detected

patient.

**Supplemental File 1**

Guideline-based exercise management for hip and knee osteoarthritis: differences in healthcare professional and patient beliefs

3.1 Select some **key words** you would use to describe their diagnosis **to the patient**. (Select all that apply)

- |                                        |                                             |                                           |
|----------------------------------------|---------------------------------------------|-------------------------------------------|
| <input type="checkbox"/> Mild          | <input type="checkbox"/> Cartilage thinning | <input type="checkbox"/> Fear avoidance   |
| <input type="checkbox"/> Moderate      | <input type="checkbox"/> Overloading        | <input type="checkbox"/> Pain sensitivity |
| <input type="checkbox"/> Severe        | <input type="checkbox"/> Overweight         | <input type="checkbox"/> Bone on bone     |
| <input type="checkbox"/> Degeneration  | <input type="checkbox"/> Deterioration      | <input type="checkbox"/> Weakness         |
| <input type="checkbox"/> Wear and tear | <input type="checkbox"/> Normal ageing      | <input type="checkbox"/> Joint swelling   |
| <input type="checkbox"/> Arthritis     | <input type="checkbox"/> Joint damage       | Other _____                               |

3.2 What investigation(s)/assessment(s), if any, would you do/order for this patient at this point

- None    Knee x-ray    Blood tests    Other \_\_\_\_\_

3.3 At this consultation, what approaches would you use, or suggest, to manage this patient? (please tick all that apply)

- |                                                    |                                                   |                                                  |
|----------------------------------------------------|---------------------------------------------------|--------------------------------------------------|
| <input type="checkbox"/> None                      | <input type="checkbox"/> Advice on footwear       | <input type="checkbox"/> Exercise                |
| <input type="checkbox"/> Ice                       | <input type="checkbox"/> General activity         | <input type="checkbox"/> Injection of steroids   |
| <input type="checkbox"/> Heat                      | <input type="checkbox"/> Provision of walking aid | <input type="checkbox"/> Oral NSAID              |
| <input type="checkbox"/> Rest                      | <input type="checkbox"/> Weight Loss              | <input type="checkbox"/> Topical NSAID           |
| <input type="checkbox"/> Weak opioids              | <input type="checkbox"/> Paracetamol              | <input type="checkbox"/> Glucosamine/Chondroitin |
| <input type="checkbox"/> Other, please state _____ |                                                   |                                                  |

3.4 If you selected exercise above, what form would this take? (Select all that apply)

- Suggest general exercise and activity  
 Suggest specific exercises  
 Give a leaflet or online resource  
 Refer to physiotherapy or other exercise specialist  
 Other (please state) \_\_\_\_\_

3.5 In an ideal world without barriers, would you refer the patient to physiotherapy or orthopaedic consultant or neither, at this stage?

- Physiotherapy  
 Orthopaedic consultant  
 Neither

3.6 In your current practice, would you refer this patient to physiotherapy at this stage?

- Yes  
 No

If yes, why? (Select all that apply)

- Deemed an appropriate candidate for supervised conservative treatment  
 Ease of access to physiotherapy  
 Lack of time to appropriately address exercise needs in practice  
 Lack of response to NSAIDS  
 Other \_\_\_\_\_

If no, why not? (Select all that apply)

- Not an appropriate candidate for conservative treatment  
 Long waiting lists and poor access to physiotherapy  
 Other interventions are a priority  
 Exercise will make the pain worse  
 Patient has tried exercise  
 I would prefer to examine further therapeutic options first (e.g., develop a pain management plan or give an intra articular steroid injection)  
 Other \_\_\_\_\_

3.7 In your current practice, would you refer this patient to an orthopaedic consultant at this stage?

- Yes  
 No

If yes, why? (Select all that apply)

- Deemed an appropriate candidate for surgery right now

**Supplemental File 1**

Guideline-based exercise management for hip and knee osteoarthritis: differences in healthcare professional and patient beliefs

- Will likely need a joint replacement in a few years so put on waiting list now  
 Need a specialist opinion  
 Other \_\_\_\_\_

If no, why not? (Select all that apply)

- More conservative treatments have not been exhausted  
 Symptoms not severe enough to warrant joint replacement  
 Waiting list too long  
 Other \_\_\_\_\_

3.8 Would you refer the patient to see someone else, either in the primary or community team or into secondary care, at this point?

- Yes  
 No  
 If yes, who? \_\_\_\_\_

**Section 4. Barriers and enablers to exercise prescription and referral in general practice**

In your practice and experience of treating patients with osteoarthritis, what are the main barriers to exercise prescription or referral? (Please select all that apply)

- Insufficient time in consultation  
 Insufficient expertise  
 Uncertainty about the effects of exercise  
 Uncertainty about the most appropriate exercise type  
 Uncertainty about the safety of exercise  
 Cost and accessibility of physiotherapy for patient  
 Physiotherapy waiting lists are too long  
 Lack of a standardized physiotherapy programme for OA in the region  
 Patients prefer other management options  
 Patients want an orthopaedic consultant referral  
 English language barrier for patients  
 Severity of disease (symptoms too mild)  
 Severity of disease (symptoms too severe)  
 Older age of patient  
 Presence of many comorbidities  
 Other \_\_\_\_\_

What enablers would help you to prescribe or refer a patient with osteoarthritis to exercise in your practice?

- Increased formal post-qualification education e.g. diploma or masters  
 Increased post-qualification training e.g. workshops, videos  
 Increased exercise education during GP training  
 More consultation time to provide exercise prescription  
 Shorter waiting lists and improved access to physiotherapy  
 Presence of an evidence-based physiotherapy-supervised group exercise programme for osteoarthritis in the locality  
 Patients who recognize the importance of strategies for self-management of pain using appropriate exercise recommendations  
 Low cost community-based exercise programmes  
 Remuneration for exercise prescription and follow up consultations  
 Other \_\_\_\_\_

**Thank you for taking the time to complete this questionnaire. Your time and participation is greatly appreciated.**

**Supplemental File 1**

Guideline-based exercise management for hip and knee osteoarthritis: differences in healthcare professional and patient beliefs

## **Survey 2: Beliefs, Barriers and Enablers to Group Exercise Programme Delivery for Hip and Knee Osteoarthritis in Physiotherapy Practice in Ireland**

The questionnaire is divided into 3 sections and should take approximately **7 minutes** to complete.

Instructions for completing this questionnaire

- When completing the questionnaire, please try and provide answers that most accurately reflect your usual clinical practice. There are no 'correct' or 'incorrect' answers.
- Please do not consult any literature while completing this questionnaire.

**Section 1. Information about you**

- How long have you been qualified as a Physiotherapist?
  - Less than 5 years experience
  - 5-10 years experience
  - Greater than 10 years experience
- How many Physiotherapists work in your clinic (including yourself) \_\_\_\_\_
- Are you:  Female  Male  Other  Prefer not to disclose
- Is your primary work setting:
  - Public hospital
  - Private hospital
  - Primary, community and continuing care
  - Private practice clinic
  - Education
  - Other (please state) \_\_\_\_\_
- Have you undertaken any specific post-qualification training, which involved education about hip or knee osteoarthritis or chronic pain? (By this we do not mean clinical placements or jobs in rheumatology or orthopaedics)  Yes  No
 

If yes, what type of training? (Provide additional details if you wish to expand)

  - In-service training Additional details \_\_\_\_\_
  - M.Sc. (taught) in this/similar field Additional details \_\_\_\_\_
  - M.Sc. (research) in this/similar field Additional details \_\_\_\_\_
  - PhD in this/similar field Additional details \_\_\_\_\_
  - Day, weekend or online course (please name most relevant) \_\_\_\_\_
  - Other \_\_\_\_\_
- How would you rate your confidence in treating hip and knee osteoarthritis?
  - Not confident
  - Slightly confident
  - Confident
  - Very confident
  - Extremely confident
- Do you have, or have you ever suffered from chronic knee or hip pain yourself?  Yes  No
- What percentage of your typical caseload is made up of patients with hip and/or knee osteoarthritis?
  - 1-5%  6-25%  26-50%  51-75%  >75%

**Section 2. Exercise beliefs for hip and knee osteoarthritis**

2.1 Where do you access your knowledge of management for persons with knee or hip osteoarthritis? (Tick all that apply)

- Published guidelines or recommendations (e.g. NICE, EULAR, OARSI)
- Clinic protocols, discussion with peers or in-services
- Reading published research articles
- Twitter or other social media
- Podcasts
- Blogs
- Infographics
- Videos
- ISCP specialist groups and other network events
- Conference attendance
- Course attendance

**Supplemental File 1**

Guideline-based exercise management for hip and knee osteoarthritis: differences in healthcare professional and patient beliefs

Other \_\_\_\_\_

Please now rank in order your preferred resources to learn from

**We are interested in your views about the role of exercise in the treatment of hip and knee osteoarthritis. Please indicate the extent to which you agree or disagree with the statements given by ticking one box per row.**

| Question                                                                                                           | Strongly Disagree | Disagree | Neutral | Agree | Strongly Agree |
|--------------------------------------------------------------------------------------------------------------------|-------------------|----------|---------|-------|----------------|
| 2.2 Hip and knee problems are improved by general exercise e.g. walking and swimming                               |                   |          |         |       |                |
| 2.3 Hip and knee problems are improved by specific muscle strengthening exercises                                  |                   |          |         |       |                |
| 2.4 Hip and knee problems are improved by focusing on motor or neuromuscular control of the joints during exercise |                   |          |         |       |                |
| 2.5 General exercise e.g. walking and swimming is safe for most patients to do                                     |                   |          |         |       |                |
| 2.6 Specific muscle strengthening exercise is safe for most patients to do                                         |                   |          |         |       |                |
| 2.7 Neuromuscular control exercises are safe for most patients to do                                               |                   |          |         |       |                |
| 2.8 Every patient with hip or knee OA should try conservative exercise treatment before surgery is considered      |                   |          |         |       |                |
| 2.9 Exercise for hip or knee OA is most beneficial when it is tailored to meet individual patient needs            |                   |          |         |       |                |
| 2.10 A standard set of exercises with individual progression is sufficient for every patient with hip or knee OA   |                   |          |         |       |                |
| 2.11 Education on lifestyle change is important for patients with OA                                               |                   |          |         |       |                |
| 2.12 Education on strategies for self-management of pain are important for patients with OA                        |                   |          |         |       |                |
| 2.13 It is important that people with OA increase their overall activity levels                                    |                   |          |         |       |                |
| 2.14 Exercise is effective for patients if an x-ray shows severe knee osteoarthritis                               |                   |          |         |       |                |
| 2.15 Most patients with hip or knee OA would benefit from a supervised group exercise programme                    |                   |          |         |       |                |
| 2.16 Most patients with hip or knee OA would benefit from an individualized exercise programme                     |                   |          |         |       |                |

**Section 3. Barriers and enablers to exercise programme delivery in physiotherapy practice**

3.1 Please select the current level of government COVID19 restrictions in place as you are completing this survey

Level 1       Level 2       Level 3       Level 4       Level 5

3.2 **Pre-COVID19** restrictions in March 2020, were you or your clinic providing **group exercise classes** for patients with hip or knee osteoarthritis?  Yes  No

If Yes, what was the average number of classes per week? \_\_\_\_\_

If No, were you interested in offering group exercise classes for osteoarthritis in an ideal world and **if no barriers** existed?

Yes

No

**Supplemental File 1**

Guideline-based exercise management for hip and knee osteoarthritis: differences in healthcare professional and patient beliefs

3.3 **Pre-COVID19** restrictions in March 2020, **what** were the main **barriers** to providing group exercise programmes for patients with osteoarthritis in your practice? (Please select all that apply)

- None
- Insufficient space and equipment resources
- Insufficient personnel (staff) resources
- Insufficient referrals or low OA caseload
- Patients want individualized programmes
- Patients prefer other management options e.g. manual therapy
- Insufficient expertise
- Uncertainty about the effects of exercise
- Uncertainty about the most appropriate exercise type
- Uncertainty about the safety of exercise
- Cost for patient
- Access for patient (e.g. travel, parking, time)
- Scheduling conflict related to patient working hours and clinic hours
- Lack of a standardised programme or protocol for exercise for OA
- English language barrier for patients
- Lack of support from colleagues or managers
- Other \_\_\_\_\_

3.4 Are you currently offering **group exercise classes** for patients with hip or knee osteoarthritis and **to what capacity?**

- Yes, face to face at full capacity
- Yes, face to face at reduced capacity compared to Pre-COVID19 restrictions
- Yes, online classes only
- Yes, combination of face-to-face and online
- No

3.5 **Under current restrictions**, are there any **additional barriers** to providing **face-to-face** group exercise programmes for patients with osteoarthritis in your practice? (Please select all that apply)

- None
- Government restrictions currently do not allow for group classes
- Hospital or clinic protocols currently do not allow for group classes
- Patients do not want to attend clinic
- Not enough resources for adequate distancing for class members
- Sanitization procedures are too time consuming
- Own COVID-related safety concerns
- Other \_\_\_\_\_

3.6 **Under current restrictions**, are there any **additional barriers** to providing **online** group exercise programmes for patients with osteoarthritis in your practice? (Please select all that apply)

- None
- Lack of IT resources in clinic (e.g. online platform, webcams, high speed Wi-Fi)
- Lack of personnel (staff) with IT knowledge
- Patients lack IT resources or knowledge
- Patients prefer to wait until they can access face-to-face treatment
- Uncertainty about the effectiveness of online group exercise
- Own personal preference
- Other \_\_\_\_\_

3.7 What **enablers** would help you to provide **face to face group exercise** classes to patients with osteoarthritis in your practice if COVID restrictions were not a factor? (Please select all that apply)

- None
- More university post-qualification education e.g. diploma or masters
- More other post-qualification training e.g. short courses, workshops, videos
- More education on group exercise delivery during physiotherapy training
- Appropriate referrals from GP or other sources
- GPs who impart knowledge regarding benefits of exercise to patients upon referral



**Supplemental File 1**

1 Guideline-based exercise management for hip and knee osteoarthritis: differences in healthcare  
2 professional and patient beliefs

- 3  Resources to deliver quality educational material regarding self-management alongside exercise  
4  More support from colleagues or managers  
5  Other \_\_\_\_\_  
6

7 3.8 What **enablers** would help you to provide an option of **online** group exercise classes to patients with  
8 osteoarthritis in your practice? (Please select all that apply)

- 9  None  
10  Improved IT infrastructure in clinic (e.g. laptops, webcams)  
11  IT skills resources for delivering online programmes (e.g. tutorials, do's and don'ts)  
12  Access to IT resources (e.g. tutorials) to provide patients with  
13  Improved Wi-Fi and bandwidth nationwide  
14  Strong evidence for effectiveness of existing online programmes  
15  An online registry allowing collection of patient outcomes pre- and post- programme  
16  Other \_\_\_\_\_  
17

18 3.9 Would you be interested in receiving **training** (1.5 day workshop) to effectively implement and deliver a  
19 standardized, international, evidence-based group exercise and education programme with online and face-  
20 to-face options for patients with osteoarthritis in your clinic?

- 21  Extremely interested  
22  Very interested  
23  Moderately interested  
24  Slightly interested  
25  Not at all interested

26 If not interested, why? \_\_\_\_\_  
27

28 3.10 If interested, how much would you be willing to pay for this continuous professional development training?

- 29  €100-150  
30  €151-200  
31  €201-250  
32  €251-300  
33  €301-350  
34  More than €350  
35  N/A  
36  
37

38 **Thank you for taking the time to complete this questionnaire. Your time and participation is greatly**  
39 **appreciated.**  
40  
41  
42  
43  
44  
45  
46  
47  
48  
49  
50  
51  
52  
53  
54  
55  
56  
57  
58  
59  
60

**Supplemental File 1**

Guideline-based exercise management for hip and knee osteoarthritis: differences in healthcare professional and patient beliefs

**Survey 3: Survey on the Role of Exercise for Hip and Knee Osteoarthritis in Adults in Ireland**

The questions below are divided into 3 sections. Please complete the questions to the best of your ability.

**Section 1. Information about you**

1. Are you:  Female  Male  Other  Prefer not to disclose
2. Which age category do you fall into?
  - 30 to 39 years
  - 40 to 49 years
  - 50 to 59 years
  - 60 to 69 years
  - 70 to 79 years
  - 80 to 89 years
  - 90 years or older
3. Which province in Ireland do you reside in?  Munster  Ulster  Connacht  Leinster  
**\*\*If "Ulster" is selected, question 3(b) will appear.**  
 3(b) Do you access your healthcare in:
  - Northern Ireland (NHS)
  - Republic of Ireland (HSE)
  - A combination of both
4. Which of the following best describes where you live?
  - Inner city
  - Suburb of a city
  - Town
  - Village
  - Open country
  - Island off Ireland
5. Have you ever been told by a health professional that you have a diagnosis of the following?(Select all that apply)
 

|                                                                   |                                                                     |
|-------------------------------------------------------------------|---------------------------------------------------------------------|
| <input type="checkbox"/> Arthritis                                | <input type="checkbox"/> Diabetes Mellitus (type 1 or 2)            |
| <input type="checkbox"/> Osteoarthritis                           | <input type="checkbox"/> Kidney or liver disease                    |
| <input type="checkbox"/> Wear and tear                            | <input type="checkbox"/> Anemia (reduced number of red blood cells) |
| <input type="checkbox"/> Degenerative changes                     | <input type="checkbox"/> Other blood disease                        |
| <input type="checkbox"/> Rheumatoid arthritis                     | <input type="checkbox"/> Cancer                                     |
| <input type="checkbox"/> Hypertension                             | <input type="checkbox"/> Depression                                 |
| <input type="checkbox"/> Heart Disease                            | <input type="checkbox"/> Anxiety                                    |
| <input type="checkbox"/> Ulcer or other bowel diseases            | <input type="checkbox"/> Other mental health disorder               |
| <input type="checkbox"/> Neurological disease e.g. Parkinson's/MS |                                                                     |
| <input type="checkbox"/> Respiratory diseases e.g. COPD           | <input type="checkbox"/> Thyroid Disease                            |
| <input type="checkbox"/> Hemochromatosis                          | <input type="checkbox"/> Fibromyalgia                               |
| <input type="checkbox"/> Other health condition _____             |                                                                     |
6. Have you had pain and joint symptoms in any of the following joints for **6 months or more** (select all that apply)
 

|                                             |                                                       |
|---------------------------------------------|-------------------------------------------------------|
| <input type="checkbox"/> Right Knee         | <input type="checkbox"/> Left Knee                    |
| <input type="checkbox"/> Right Hip          | <input type="checkbox"/> Left Hip                     |
| <input type="checkbox"/> Right Ankle        | <input type="checkbox"/> Left Ankle                   |
| <input type="checkbox"/> Right Shoulder     | <input type="checkbox"/> Left Shoulder                |
| <input type="checkbox"/> Right Elbow        | <input type="checkbox"/> Left Elbow                   |
| <input type="checkbox"/> Right Wrist        | <input type="checkbox"/> Left Wrist                   |
| <input type="checkbox"/> Right Hand/Fingers | <input type="checkbox"/> Left Hand/Fingers            |
| <input type="checkbox"/> Lower Back         | <input type="checkbox"/> Other, please describe _____ |
| <input type="checkbox"/> Mid Back           |                                                       |
| <input type="checkbox"/> Neck               |                                                       |
7. Have you ever had joint replacement surgery for any of your painful joints? Please select below the joints that have been replaced.
 

|                                         |                                        |
|-----------------------------------------|----------------------------------------|
| <input type="checkbox"/> Right Knee     | <input type="checkbox"/> Left Knee     |
| <input type="checkbox"/> Right Hip      | <input type="checkbox"/> Left Hip      |
| <input type="checkbox"/> Right Ankle    | <input type="checkbox"/> Left Ankle    |
| <input type="checkbox"/> Right Shoulder | <input type="checkbox"/> Left Shoulder |

**Supplemental File 1**

Guideline-based exercise management for hip and knee osteoarthritis: differences in healthcare professional and patient beliefs

- Right Elbow                       Left Elbow  
 Right Wrist                       Left Wrist  
 Right Hand/Fingers               Left Hand/Fingers  
 Other, please describe \_\_\_\_\_

8. Of your hip and/or knee joints that have **NOT** been replaced, which joint are you most bothered by? (select one)

- Right Knee                       Left Knee  
 Right Hip                       Left Hip

**All remaining questions will now be related to the joint that you have chosen.**

9. How long have you been experiencing pain in your [insert chosen joint]?

- 6 months – 1 year  
 1 – 2 years  
 2 – 3 years  
 3 – 4 years  
 4 – 5 years  
 More than 5 years

10. Have you seen or spoken to your GP about your painful [insert chosen joint]?  Yes  No

11. Have you ever had an x-ray of your [insert chosen joint]?  Yes  No

12. Has your GP ever referred you to an **orthopaedic consultant** for your [insert chosen joint]?

- Yes  
 No  
 Currently on a waiting list (private consultant referral)  
 Currently on a waiting list (public consultant referral)

\*\* If on a waiting list, how long have you been waiting?

- Less than 6 months  
 6 months – 1 year  
 1 year – 1.5 years  
 1.5 years – 2 years  
 More than 2 years

13. Has your GP ever referred you to a **physiotherapist** for your [insert chosen joint]?

- Yes  
 No  
 Currently on a waiting list (private consultant referral)  
 Currently on a waiting list (public consultant referral)

\* If on a waiting list, how long have you been waiting?

- Less than 6 months  
 6 months – 1 year  
 1 year – 1.5 years  
 1.5 years – 2 years  
 More than 2 years

14. How would you rate the pain and symptoms you are experiencing in your hip and/or knee on an average day?

- No pain or symptoms  
 Mild pain and symptoms  
 Moderate pain and symptoms  
 Severe pain and symptoms

15. Have you EVER tried any of the following specifically for your [insert chosen joint]?

Muscle strengthening exercise

(e.g. using weight/resistance band)  No, never               Yes, currently using               Yes, stopped using

Aerobic exercise

(e.g. cycling, walking, fitness class)  No, never               Yes, currently using               Yes, stopped using

Information/Education course

(e.g. self-management programme)  No, never               Yes, currently using               Yes, stopped using

Making efforts to lose weight

No, never               Yes, currently using               Yes, stopped using

**Supplemental File 1**

Guideline-based exercise management for hip and knee osteoarthritis: differences in healthcare professional and patient beliefs

**Section 2. Exercise beliefs for hip and knee osteoarthritis**

We are interested in your views about the role of exercise in the treatment of hip and knee osteoarthritis.

Please indicate how much you agree or disagree with the statements given by selecting one option per question.

| Question                                                                                                                                | Strongly Disagree | Disagree | Neutral | Agree | Strongly Agree |
|-----------------------------------------------------------------------------------------------------------------------------------------|-------------------|----------|---------|-------|----------------|
| 2.1 Hip and knee problems can be improved by general exercise e.g. walking and swimming                                                 |                   |          |         |       |                |
| 2.2 Hip and knee problems can be improved by specific muscle strengthening exercises                                                    |                   |          |         |       |                |
| 2.3 General exercise e.g. walking and swimming is safe for everybody to do                                                              |                   |          |         |       |                |
| 2.4 Specific muscle strengthening exercise is safe for everyone to do                                                                   |                   |          |         |       |                |
| 2.5 Every patient with hip or knee osteoarthritis should try exercise treatment before surgery is considered                            |                   |          |         |       |                |
| 2.6 Patients should learn more about how to self-manage their pain and symptoms using exercise and physical activity                    |                   |          |         |       |                |
| 2.7 The best way to learn about exercise is in a supervised group setting with people who have similar pain (Pre-COVID-19 restrictions) |                   |          |         |       |                |
| 2.8 The best way to learn about exercise is in a one-on-one setting with a health professional (Pre-COVID-19 restrictions)              |                   |          |         |       |                |
| 2.9 Exercise is effective for patients if an x-ray shows severe knee osteoarthritis                                                     |                   |          |         |       |                |
| 2.10 Exercise works just as well for everybody, regardless of the amount of pain they have                                              |                   |          |         |       |                |

**Section 3. Barriers and enablers to exercise for hip and knee osteoarthritis**

In this section we want to know more about your exercise experience and what kinds of things would prevent you or help you do more exercise

3.1 How many times a week do you exercise (e.g. 30 minute walk)?

- 3 or more days per week
- Less than 3 days per week
- I don't exercise

3.2 Has a health professional ever given you specific exercises for your [insert chosen joint]?

- Yes
- No
- Not sure
- \*If Yes, what type of health professional? (select all that apply)
- Physiotherapist
- GP
- Orthopaedic surgeon
- Nurse
- Personal trainer
- Other, please name \_\_\_\_\_

\*If Yes, what type of exercise?

- Home-based individual exercises
- Group exercise class for osteoarthritis
- Other, please state \_\_\_\_\_

\*If Yes, did you find the exercise beneficial?

- Yes
- No
- Not sure

3.3 Please select the current level of government COVID19 restrictions in place as you are completing this survey

**Supplemental File 1**

Guideline-based exercise management for hip and knee osteoarthritis: differences in healthcare professional and patient beliefs

Level 1       Level 2       Level 3       Level 4       Level 5 (strictest restrictions)

3.4 Thinking about life **without COVID19** restrictions, **what** are the main **barriers** that would prevent you from exercising? (Please select all that apply)

- Pain or other joint symptoms
- I need assistance for mobility e.g. walking stick, wheelchair
- Finding time to exercise
- Lack of enjoyment from exercise
- Lack of exercise buddy or support network
- Wet or cold weather
- Other health problems
- Other disability e.g. visual impairment
- Cost of a gym membership or physiotherapy visit
- Cost of active wear or equipment
- I don't know the best types of exercise to do
- I don't know who to contact to learn more or do more exercise
- Uncertainty about the safety of exercise for joint pain
- Uncertainty about the benefit of exercise for joint pain
- Negative body image
- Access to facilities (e.g. availability, travel, parking)
- Work commitments
- Family commitments or other responsibilities
- Age
- Fear of injury
- Tiredness and fatigue
- Depression
- Other \_\_\_\_\_

3.5 Thinking about life **without COVID19** restrictions, what types of things would **help you to exercise more?** (Please select all that apply)

- Better knowledge of the best type of exercise to do
- Access to exercise that is supervised by a health professional
- Social aspect e.g. group exercise with other people with hip or knee pain
- More confidence in your joint
- Exercise recommendations from a GP
- Exercise recommendations from a physiotherapist
- More support from family or friends
- Warm and dry weather for outdoor exercise
- Low cost community exercise programmes
- Safe exercise environment (e.g. well-lit pathways)
- Other \_\_\_\_\_

3.6 Thinking about life **without COVID-19**, how interested would you be in attending a 6-week, twice per week, physiotherapy-supervised group exercise and education class for your hip or knee pain **at a clinic or community centre?**

- Extremely interested
  - Very interested
  - Moderately interested
  - Slightly interested
  - Not at all interested
- If not interested, why? \_\_\_\_\_

3.7 Thinking about **current restrictions**, how interested would you be in taking part in a 6-week, twice per week, **ONLINE** physiotherapy-supervised group exercise and education class for you hip or knee pain?

- Extremely interested
- Very interested
- Moderately interested
- Slightly interested

**Supplemental File 1**

Guideline-based exercise management for hip and knee osteoarthritis: differences in healthcare professional and patient beliefs

Not at all interested

If not interested, why? \_\_\_\_\_

3.8 Do you have any experience with online-delivered healthcare or telerehabilitation from a GP or other health professional?

Yes

No

3.9 What are the **barriers** that would prevent you taking part in an **online exercise** class? (Please select all that apply)

Lack of technology equipment (e.g. laptop, smartphone or tablet, webcams)

Lack of confidence in using computers, laptops etc.

Wi-Fi / Broadband connection is not good enough

Preference to wait until I can access face-to-face treatment

Uncertain about how online group exercise would work

Lack of space in home environment to perform exercises

English language barriers

Lack of time to take part

Other \_\_\_\_\_

3.10 What would **help you** to take part in an **online** group exercise class with other people with osteoarthritis? (Please select all that apply)

An initial one-to-one session with a physiotherapist to get familiar with the process

Resources (e.g. videos) with explanations of how to get started

Improved Wi-Fi and bandwidth

Examples and testimonials from patients who have finished the classes

Opportunities to chat online with other patients before and after the class

Support from family members to get set up in your home

A laptop or tablet

Other \_\_\_\_\_

3.11 If interested, how much would you be willing to pay to take part in these exercise classes (price in euros for entire 14-15 session programme)?

€0-25

€26-50

€51-100

€101-150

€151-200

> €200

**Thank you for taking the time to complete this questionnaire. Your time and participation is greatly appreciated.**

**Supplemental File 2**

Guideline-based exercise management for hip and knee osteoarthritis: differences in healthcare professional and patient beliefs

**Supplemental Table:** Multivariable linear regression models to determine if positive beliefs about exercise in PwOA are associated with (1) referral to physiotherapist by a GP and (2) if they have seen a physiotherapist for their joint pain.

| <i>Dependent Variable: Number of exercise belief statements agreed with</i>       |          |             |                                |            |             |               |                              |              |
|-----------------------------------------------------------------------------------|----------|-------------|--------------------------------|------------|-------------|---------------|------------------------------|--------------|
| <b>Variables<br/>Model 1<sup>a</sup></b>                                          | <b>B</b> | <b>S.E.</b> | <b>Partial<br/>Correlation</b> | <b>VIF</b> | <b>Sig.</b> | <b>Exp(B)</b> | <b>95% CI for<br/>EXP(B)</b> |              |
|                                                                                   |          |             |                                |            |             |               | <b>Lower</b>                 | <b>Upper</b> |
| <i>Has your GP ever referred you to a physiotherapist for your painful joint?</i> | 0.700    | 0.400       | 0.187                          | 1.124      | 0.084       | 0.185         | -0.095                       | 1.496        |
| <i>Sex</i>                                                                        | -0.620   | 0.374       | -0.177                         | 1.015      | 0.101       | -0.166        | -1.363                       | 0.124        |
| <i>How long have you been experiencing pain in your joint?</i>                    | -0.163   | 0.100       | -0.174                         | 1.130      | 0.106       | -0.173        | -0.361                       | 0.035        |
| <i>Number of comorbidities</i>                                                    | -0.314   | 0.123       | 0.268                          | 1.027      | 0.012       | -0.259        | -0.557                       | -0.070       |
| <i>Constant</i>                                                                   | 7.687    | 0.604       | -                              | -          | 0.000       | -             | 6.485                        | 8.888        |
| <b>Model 2<sup>b</sup></b>                                                        |          |             |                                |            |             |               |                              |              |
| <i>Have you seen a physiotherapist for your painful joint?</i>                    | 1.060    | 0.383       | 0.288                          | 1.138      | 0.007       | 0.287         | 0.299                        | 1.821        |
| <i>Sex</i>                                                                        | -0.723   | 0.362       | -0.212                         | 1.003      | 0.049       | -0.194        | -1.444                       | -0.003       |
| <i>How long have you been experiencing pain in your joint?</i>                    | -0.204   | 0.099       | -0.219                         | 1.163      | 0.042       | -0.216        | -0.400                       | -0.008       |
| <i>Number of comorbidities</i>                                                    | -0.293   | 0.119       | -0.257                         | 1.026      | 0.016       | -0.241        | -0.530                       | -0.055       |
| <i>Constant</i>                                                                   | 7.680    | 0.585       | -                              | -          | 0.000       | -             | 6.034                        | 9.653        |

<sup>a</sup>Model variables removed due to non-significance (1): *How long have you been experiencing pain in your joint?*, *How would you rate the pain and symptoms you are experiencing in your hip and/or knee on an average day?*.

<sup>b</sup>Model variables removed due to non-significance (2): *How would you rate the pain and symptoms you are experiencing in your hip and/or knee on an average day?*. B, beta coefficient; GP, general practitioner; OA, osteoarthritis; PT, physiotherapist; PwOA, people with osteoarthritis; S.E., standard error; VIF, variance inflation factor.

STROBE Statement—Checklist of items that should be included in reports of *cross-sectional studies*

|                              | Item No | Recommendation                                                                                                                                                                                    | Page No |
|------------------------------|---------|---------------------------------------------------------------------------------------------------------------------------------------------------------------------------------------------------|---------|
| <b>Title and abstract</b>    | 1       | (a) Indicate the study's design with a commonly used term in the title or the abstract                                                                                                            | 1       |
|                              |         | (b) Provide in the abstract an informative and balanced summary of what was done and what was found                                                                                               | 1       |
| <b>Introduction</b>          |         |                                                                                                                                                                                                   |         |
| Background/rationale         | 2       | Explain the scientific background and rationale for the investigation being reported                                                                                                              | 3-4     |
| Objectives                   | 3       | State specific objectives, including any prespecified hypotheses                                                                                                                                  | 4       |
| <b>Methods</b>               |         |                                                                                                                                                                                                   |         |
| Study design                 | 4       | Present key elements of study design early in the paper                                                                                                                                           | 4-5     |
| Setting                      | 5       | Describe the setting, locations, and relevant dates, including periods of recruitment, exposure, follow-up, and data collection                                                                   | 4-5     |
| Participants                 | 6       | (a) Give the eligibility criteria, and the sources and methods of selection of participants                                                                                                       | 5       |
| Variables                    | 7       | Clearly define all outcomes, exposures, predictors, potential confounders, and effect modifiers. Give diagnostic criteria, if applicable                                                          | 5-6     |
| Data sources/<br>measurement | 8*      | For each variable of interest, give sources of data and details of methods of assessment (measurement). Describe comparability of assessment methods if there is more than one group              | 5-7     |
| Bias                         | 9       | Describe any efforts to address potential sources of bias                                                                                                                                         | n/a     |
| Study size                   | 10      | Explain how the study size was arrived at                                                                                                                                                         | n/a     |
| Quantitative variables       | 11      | Explain how quantitative variables were handled in the analyses. If applicable, describe which groupings were chosen and why                                                                      | 5-6     |
| Statistical methods          | 12      | (a) Describe all statistical methods, including those used to control for confounding                                                                                                             | 6-7     |
|                              |         | (b) Describe any methods used to examine subgroups and interactions                                                                                                                               | 6-7     |
|                              |         | (c) Explain how missing data were addressed                                                                                                                                                       | 7       |
|                              |         | (d) If applicable, describe analytical methods taking account of sampling strategy                                                                                                                | 6-7     |
|                              |         | (e) Describe any sensitivity analyses                                                                                                                                                             | n/a     |
| <b>Results</b>               |         |                                                                                                                                                                                                   |         |
| Participants                 | 13*     | (a) Report numbers of individuals at each stage of study—eg numbers potentially eligible, examined for eligibility, confirmed eligible, included in the study, completing follow-up, and analysed | 7       |
|                              |         | (b) Give reasons for non-participation at each stage                                                                                                                                              | 7       |
|                              |         | (c) Consider use of a flow diagram                                                                                                                                                                | n/a     |
| Descriptive data             | 14*     | (a) Give characteristics of study participants (eg demographic, clinical, social) and information on exposures and potential confounders                                                          | Table 1 |
|                              |         | (b) Indicate number of participants with missing data for each variable of interest                                                                                                               | Table 1 |



|                          |     |                                                                                                                                                                                                              |                    |
|--------------------------|-----|--------------------------------------------------------------------------------------------------------------------------------------------------------------------------------------------------------------|--------------------|
| Outcome data             | 15* | Report numbers of outcome events or summary measures                                                                                                                                                         | Page 7, Figure 1-3 |
| Main results             | 16  | (a) Give unadjusted estimates and, if applicable, confounder-adjusted estimates and their precision (eg, 95% confidence interval). Make clear which confounders were adjusted for and why they were included | Table 3            |
|                          |     | (b) Report category boundaries when continuous variables were categorized                                                                                                                                    | n/a                |
|                          |     | (c) If relevant, consider translating estimates of relative risk into absolute risk for a meaningful time period                                                                                             | n/a                |
| Other analyses           | 17  | Report other analyses done—eg analyses of subgroups and interactions, and sensitivity analyses                                                                                                               | n/a                |
| <b>Discussion</b>        |     |                                                                                                                                                                                                              |                    |
| Key results              | 18  | Summarise key results with reference to study objectives                                                                                                                                                     | 14-15              |
| Limitations              | 19  | Discuss limitations of the study, taking into account sources of potential bias or imprecision. Discuss both direction and magnitude of any potential bias                                                   | 18                 |
| Interpretation           | 20  | Give a cautious overall interpretation of results considering objectives, limitations, multiplicity of analyses, results from similar studies, and other relevant evidence                                   | 16,17              |
| Generalisability         | 21  | Discuss the generalisability (external validity) of the study results                                                                                                                                        | 18                 |
| <b>Other information</b> |     |                                                                                                                                                                                                              |                    |
| Funding                  | 22  | Give the source of funding and the role of the funders for the present study and, if applicable, for the original study on which the present article is based                                                | 18                 |

\*Give information separately for exposed and unexposed groups.

**Note:** An Explanation and Elaboration article discusses each checklist item and gives methodological background and published examples of transparent reporting. The STROBE checklist is best used in conjunction with this article (freely available on the Web sites of PLoS Medicine at <http://www.plosmedicine.org/>, Annals of Internal Medicine at <http://www.annals.org/>, and Epidemiology at <http://www.epidem.com/>). Information on the STROBE Initiative is available at [www.strobe-statement.org](http://www.strobe-statement.org).
