# Supplementary material for: Guideline-based exercise management for hip and knee osteoarthritis: a cross-sectional comparison of healthcare professional and patient beliefs in Ireland
Source: PubMed Central journal article supplement — BMJ Open. 2024 Jul 5;14(7):e080646. doi: 10.1136/bmjopen-2023-080646 (PMC11227783; doi:10.1136/bmjopen-2023-080646), 2024-07-05
Supplement: bmjopen-2023-080646supp002.pdf [file bmjopen-2023-080646supp002.pdf]

**Supplemental File 2**  
Guideline-based exercise management for hip and knee osteoarthritis: differences in healthcare professional and patient beliefs

**Supplemental Table:** Multivariable linear regression models to determine if positive beliefs about exercise in PwOA are associated with (1) referral to physiotherapist by a GP and (2) if they have seen a physiotherapist for their joint pain.

| Dependent Variable: Number of exercise belief statements agreed with       |        |       |                        |       |       |        |                      |        |
|----------------------------------------------------------------------------|--------|-------|------------------------|-------|-------|--------|----------------------|--------|
| Variables<br>Model 1 <sup>a</sup>                                          | B      | S.E.  | Partial<br>Correlation | VIF   | Sig.  | Exp(B) | 95% CI for<br>EXP(B) |        |
|                                                                            |        |       |                        |       |       |        | Lower                | Upper  |
| Has your GP ever referred you to a physiotherapist for your painful joint? | 0.700  | 0.400 | 0.187                  | 1.124 | 0.084 | 0.185  | -0.095               | 1.496  |
| Sex                                                                        | -0.620 | 0.374 | -0.177                 | 1.015 | 0.101 | -0.166 | -1.363               | 0.124  |
| How long have you been experiencing pain in your joint?                    | -0.163 | 0.100 | -0.174                 | 1.130 | 0.106 | -0.173 | -0.361               | 0.035  |
| Number of comorbidities                                                    | -0.314 | 0.123 | 0.268                  | 1.027 | 0.012 | -0.259 | -0.557               | -0.070 |
| Constant                                                                   | 7.687  | 0.604 | -                      | -     | 0.000 | -      | 6.485                | 8.888  |
| Model 2 <sup>b</sup>                                                       |        |       |                        |       |       |        |                      |        |
| Have you seen a physiotherapist for your painful joint?                    | 1.060  | 0.383 | 0.288                  | 1.138 | 0.007 | 0.287  | 0.299                | 1.821  |
| Sex                                                                        | -0.723 | 0.362 | -0.212                 | 1.003 | 0.049 | -0.194 | -1.444               | -0.003 |
| How long have you been experiencing pain in your joint?                    | -0.204 | 0.099 | -0.219                 | 1.163 | 0.042 | -0.216 | -0.400               | -0.008 |
| Number of comorbidities                                                    | -0.293 | 0.119 | -0.257                 | 1.026 | 0.016 | -0.241 | -0.530               | -0.055 |
| Constant                                                                   | 7.680  | 0.585 | -                      | -     | 0.000 | -      | 6.034                | 9.653  |

<sup>a</sup>Model variables removed due to non-significance (1): *How long have you been experiencing pain in your joint?*, *How would you rate the pain and symptoms you are experiencing in your hip and/or knee on an average day?*.  
<sup>b</sup>Model variables removed due to non-significance (2): *How would you rate the pain and symptoms you are experiencing in your hip and/or knee on an average day?*. B, beta coefficient; GP, general practitioner; OA, osteoarthritis; PT, physiotherapist; PwOA, people with osteoarthritis; S.E., standard error; VIF, variance inflation factor.
